# Supplementary material for: Media framing of childhood obesity: a content analysis of UK newspapers from 1996 to 2014
Source: PubMed Central journal article supplement (PMC6500306; doi:10.1136/bmjopen-2018-025646), 2019-04-04
Supplement: bmjopen-2018-025646.draft_revisions.pdf [file bmjopen-2018-025646.draft_revisions.pdf]

# BMJ Open

BMJ Open is committed to open peer review. As part of this commitment we make the peer review history of every article we publish publicly available.

When an article is published we post the peer reviewers' comments and the authors' responses online. We also post the versions of the paper that were used during peer review. These are the versions that the peer review comments apply to.

The versions of the paper that follow are the versions that were submitted during the peer review process. They are not the versions of record or the final published versions. They should not be cited or distributed as the published version of this manuscript.

BMJ Open is an open access journal and the full, final, typeset and author-corrected version of record of the manuscript is available on our site with no access controls, subscription charges or pay-per-view fees (<http://bmjopen.bmj.com>).

If you have any questions on BMJ Open's open peer review process please email [info.bmjopen@bmj.com](mailto:info.bmjopen@bmj.com)

# BMJ Open

## Media framing of childhood obesity: a content analysis of UK newspapers from 1996-2014

|                               |                                                                                                                                                                                                                                                             |
|-------------------------------|-------------------------------------------------------------------------------------------------------------------------------------------------------------------------------------------------------------------------------------------------------------|
| Journal:                      | <i>BMJ Open</i>                                                                                                                                                                                                                                             |
| Manuscript ID                 | bmjopen-2018-025646                                                                                                                                                                                                                                         |
| Article Type:                 | Research                                                                                                                                                                                                                                                    |
| Date Submitted by the Author: | 27-Jul-2018                                                                                                                                                                                                                                                 |
| Complete List of Authors:     | Nimegeer, Amy; Glasgow University, MRC/CSO Social and Public Health Sciences<br>Patterson, Chris; University of Glasgow, MRC/CSO Social & Public Health Sciences Unit<br>Hilton, Shona; University of Glasgow, MRC/CSO Social & Public Health Sciences Unit |
| Keywords:                     | Health policy < HEALTH SERVICES ADMINISTRATION & MANAGEMENT, MEDICAL JOURNALISM, Community child health < PAEDIATRICS, PAEDIATRICS, PUBLIC HEALTH, STATISTICS & RESEARCH METHODS                                                                            |
|                               |                                                                                                                                                                                                                                                             |

SCHOLARONE™  
Manuscripts

Peer Review Only

1  
2  
3 **TITLE:** Media framing of childhood obesity: a content analysis of UK newspapers from 1996-2014  
4

5 **AUTHORS:** Amy Nimegeer<sup>1</sup>, Chris Patterson<sup>1</sup>, Shona Hilton<sup>1</sup>  
6  
7

8 **AFFILIATION:** <sup>1</sup>MRC/CSO Social and Public Health Sciences Unit, University of Glasgow, 200 Renfield  
9  
10 Street, Glasgow, G2 3QB, United Kingdom  
11  
12

13 **KEYWORDS:** Obesity, Children, Media, content analysis  
14  
15

16 **RUNNING TITLE:** UK Media framing of childhood obesity  
17

18 **CONTACT INFORMATION:**

19  
20 Dr Amy Nimegeer, MRC/CSO Social and Public Health Sciences Unit, University of Glasgow, 200  
21 Renfield Street, Glasgow, G2 3QB, United Kingdom  
22  
23 [amy.nimegeer@glasgow.ac.uk](mailto:amy.nimegeer@glasgow.ac.uk)  
24

25 Emails for additional authors: [chris.patterson@glasgow.ac.uk](mailto:chris.patterson@glasgow.ac.uk) ; [shona.hilton@glasgow.ac.uk](mailto:shona.hilton@glasgow.ac.uk)  
26  
27

28 **WORD COUNT (excluding cover page, abstract, references, tables, and figures):** 4166  
29  
30  
31  
32  
33  
34  
35  
36  
37  
38  
39  
40  
41  
42  
43  
44  
45  
46  
47  
48  
49  
50  
51  
52  
53  
54  
55  
56  
57  
58  
59  
60

## Abstract

*Objective and Setting:* Media can influence public and policymakers' perceptions of causes and solutions of public health issues through selective presentation and framing. To understand the salience and framing of childhood obesity across 19 years of UK national newspaper content.

*Design and Outcome Measures:* Quantitative content analysis of 757 articles about childhood obesity obtained from six daily and five Sunday newspapers. Articles were coded manually for definitions, drivers and potential solutions. Data were analysed statistically, including analysis of time trends and variations.

*Results:* The frequency of articles grew from a low of two in 1996 to a peak of 82 in 2008, then declined to 40 in 2010. Alarmist headlines (21.8%) greatly outnumbered reassuring headlines (2.9%). Individual-level drivers (59.8%) and solutions (36.5%) were mentioned more frequently than societal-level drivers (28.3%) and solutions (28.3%) across the sample, but societal solutions were mentioned more frequently during the final eight years, coinciding with a marked decline in overall frequency of articles.

*Conclusions:* Increased focus on societal solutions aligns with public health goals, but coincides with a reduction in media salience. Those advocating public policy solutions to childhood obesity may benefit from seeking to raise the issue's media profile while continuing to promote structural ways of conceptualising obesity.

## Article Summary

### *Strengths and Limitations of this Study*

#### **Strengths**

- Methodology includes systematic analysis of a large sample of nineteen years of UK national newspaper coverage, facilitating statistical understandings of media frames of childhood obesity, including definitions, drivers and solutions
- Features robust manual coding and links to pre-existing dataset to strengthen analysis

#### **Weaknesses**

- Quantitative media content analysis is inherently less nuanced than qualitative analysis and our analysis excluded images which may influence readers' interpretations of the media texts
- Content analysis makes clear which messages are produced by media but cannot tell us how these messages are received by audiences

#### **Funding Statement**

AN, CP and SH's time for this research was funded by the Informing Healthy Public Policy programme (MC\_UU\_12017-15 and SPHSU15) of the MRC/CSO Social and Public Health Sciences Unit, University of Glasgow. The funding bodies had no role in the design, collection, analysis or interpretation of this study.

#### **Competing Interests**

SH, CP and AN declare no conflicts of interest. All three authors work at the MRC/CSO Social and Public Health Sciences Unit, University of Glasgow, which receives joint funding from the Medical

1  
2  
3 Research Council and Chief Scientist Office. Their time on this research was paid for by that core  
4  
5 funding.

### 6 7 **Acknowledgements**

8  
9  
10 The authors would like to thank Dr Jonathan Olsen of the MRC/CSO Social and Public Health Sciences  
11  
12 Unit, University of Glasgow, for his advice regarding the conduct of multiple logistic regression  
13  
14 analysis. We would also like to acknowledge the contribution of Dr Marie L f and Dr Mark Daku to  
15  
16 the design of this study.  
17  
18  
19  
20  
21  
22  
23  
24  
25  
26  
27  
28  
29  
30  
31  
32  
33  
34  
35  
36  
37  
38  
39  
40  
41  
42  
43  
44  
45  
46  
47  
48  
49  
50  
51  
52  
53  
54  
55  
56  
57  
58  
59  
60

## Introduction

Childhood obesity has been described as an international epidemic due to its high prevalence and rapid growth in numerous countries(1). Globally, 13.4% of girls and 12.9% of boys in Low Income Countries, and 22.6% of girls, and 23.8% of boys in High Income Countries (classified by the World Bank) were overweight or obese in 2013(2). In England, one fifth of children in Reception year (age 4-5), and one third in Year 6 (age 10-11), were overweight or obese in 2015/2016 (3).In Scotland, 28% of children aged 2-15 were classified as ‘at risk of’ overweight or obesity in 2015 (4).Childhood obesity has a broad range of short- and long-term health consequences (1), tends to predict adolescent and adult obesity (5), and is socioeconomically patterned(3). For these reasons childhood obesity has been identified as a health priority for the UK and its devolved governments(6, 7).

Childhood obesity is a complex problem, with a complex set of drivers and potential solutions ranging from the individual to the environmental(8). Ebbeling and colleagues (1) identify a wide range of causes, but argue that the problem “*can be primarily attributed to adverse environmental factors*”, and identify a need for “*straightforward, if politically difficult*” solutions spanning homes, schools, the built environment, health care, marketing, media and politics. This multi-level package of solutions echoes Friedman’s assertion that a ‘full-court press’ targeting ‘every dimension of the problem’ is necessary(9). However, while academia and public health are united on the need to target the obesogenic environment, Swinburn and colleagues (10) state that “*governments have largely abdicated the responsibility for addressing obesity to individuals, the private sector, and non-governmental organisations*”(10), potentially due to anticipated or actual resistance, not just from corporations, but also electorates (9, 11).Indeed, public opinion research conducted in the US (12)and Germany (13) suggests that, while publics are in favour of tackling childhood obesity, they demonstrate less enthusiasm for regulative environmental interventions such as taxation. Hilbert characterises the German population as “*ready for obesity prevention*”, but in need of education about the definition, prevalence and causes of obesity (12).

1  
2  
3 The media represent a key influence on public perceptions of health issues and policies, setting the  
4 public agenda by granting different levels of prominence to different topics(14), and influencing how  
5 those issues are understood by building frames (focuses of attention) that include constructions of  
6 problems, affected groups, drivers and solutions (15, 16). The influence of framing is well established  
7 in relation to obesity. Researchers have used experimental designs to demonstrate that  
8 'individualised' representations of childhood obesity tend to lead participants to assign greater  
9 blame to individuals and exhibit less support for environmental regulation(17), and that different  
10 representations of the consequences of childhood obesity can influence participants' attitudes  
11 towards policies (18). Similarly, Barry and colleagues demonstrated that people's perceptions of  
12 obesity (as communicated through agreement with metaphor-based descriptions of obesity) predict  
13 their support for public policy interventions, illustrating how, for example, framing obesity as being  
14 driven by industry manipulation may lead to increased support for a 'junk-food tax'(19).

15  
16  
17  
18  
19  
20  
21  
22  
23  
24  
25  
26  
27  
28  
29 The media are frequently accused of contributing to obesity, particularly childhood obesity, through  
30 its associations with sedentary behaviour, advertising of unhealthy commodities, promotion of  
31 unrealistic body image, and other mechanisms(20). Many researchers have studied media  
32 representations of obesity in general (21, 22, 23, 24, 25, 26, 27, 28, 29, 30, 31, 32, 33), but relatively  
33 few have focused specifically on representations of childhood obesity, and these have been primarily  
34 in the US and Australia. Barry and colleagues (34) studied US print and television news framing of  
35 childhood obesity, observing that coverage of the issue grew between 2000 and 2009, and that  
36 individual-level behavioural solutions to obesity were dominant, particularly on television. Similarly,  
37 Hawkins and Linvill (35) studied US newspaper framing of childhood obesity over three discrete time  
38 periods in 1991, 2001 and 2006, and identified a predominant focus on individual-level factors (both  
39 individual children and their parents) in representations of both causes and solutions. Kalin and Fung  
40 (36) analysed Spanish-language US parenting magazines' representations of childhood obesity  
41 prevention and control, identifying greater focus on parental behaviour-change than system-level  
42 solutions, with a low level of recognition of social contextual factors, and recommend that health  
43  
44  
45  
46  
47  
48  
49  
50  
51  
52  
53  
54  
55  
56  
57  
58  
59  
60



1  
2  
3 professionals engage with the media to reframe coverage of the problem in environmental, rather  
4  
5 than behavioural terms.  
6

7  
8 Bastian(37) analysed representations of childhood obesity in both Australian newspapers and  
9  
10 academic literature in 2009, identifying predominantly individual framing within the media,  
11  
12 compared to a social-structural framing in academic literature. Bastian (37) recommends that public  
13  
14 health professionals work to redirect media attention towards structural drivers of childhood  
15  
16 obesity. Maher and colleagues (38) analysed constructions of maternal responsibilities within  
17  
18 Australian media coverage of childhood obesity, concluding that the dominant framing  
19  
20 *“individualises maternal and child relationships rather than seeing mothering as embedded in*  
21  
22 *broader social and economic structures”*, serving a neo-liberal agenda by diminishing the  
23  
24 responsibility of wider society. This is consistent with the disproportionate focus on individual-level  
25  
26 solutions identified by others (34, 35, 36, 37). While coverage of obesity in both adults and children  
27  
28 appears to be characterised by individual-framing, it is notable that with adult obesity that individual  
29  
30 responsibility is assigned to the person with obesity, while in childhood obesity that responsibility is  
31  
32 predominantly assigned to parents, particularly mothers(39, 40). This distinction may complicate  
33  
34 direct comparison between adult and child obesity, and the culturally-ingrained nature of the  
35  
36 concept that parents (or mothers) are solely responsible for their children’s healthcare may  
37  
38 represent a discursive obstacle to attempts to assign environmental solutions to childhood obesity.  
39  
40

41  
42 The aim of this study is to further understandings of media representations of childhood obesity in  
43  
44 the UK context, using an approach informed by media framing theory(15, 16), analysing definitions  
45  
46 of the problem and constructions of drivers and solutions. This is important because, while  
47  
48 childhood obesity in the UK shares many similarities with that of other countries, the UK context  
49  
50 differs in terms of several elements including health service structure and media environment. The  
51  
52 analysis will have dual foci: the evolution of coverage between 1996 and 2014, and the relative  
53  
54 salience of individual and societal constructions of the drivers of, and potential solutions to,  
55  
56

1  
2  
3 childhood obesity. To our knowledge, this research will be the first empirical analysis of UK media  
4 framing of childhood obesity specifically. This paper comprises the UK portion of a multi-country  
5 research project, the other parts of which will be reported in separate papers.  
6  
7  
8  
9

## 10 **Methods**

11  
12 The media content analysis methods used were predominantly based on Hilton and colleagues' prior  
13 study(21) of UK newspaper framing of obesity in the general population, adapted for this study's  
14 focus on childhood obesity. This paper reports UK data that was part of a wider study that examined  
15 childhood obesity media coverage in two other international contexts; Sweden and the United  
16 States.  
17  
18  
19  
20  
21  
22  
23

### 24 *Sampling*

25  
26 A set of six daily newspapers and five Sunday newspapers with high circulation figures(41) were  
27 chosen. Table 1 lists these publications and indicates their political alignments and the markets (or  
28 'genres') that they occupy. Markets were defined as tabloid (typically sensationalist and politically  
29 diverse, with predominantly working-class readerships), middle-market tabloid (centre-right content  
30 with predominantly older, middle-class readerships) and quality (serious tone with predominantly  
31 middle-class readerships), using a typology used in prior studies of UK newspaper content(21).A  
32 sample period of 1996 to 2014 was chosen to encompass the time period covered in prior research  
33 (21), in addition to a further four years of coverage that was extended to align with the time period  
34 covered by the other countries in our wider study (which will be described fully in a separate  
35 publication).  
36  
37  
38  
39  
40  
41  
42  
43  
44  
45  
46  
47

48 Identifying relevant articles from the chosen publications involved an initial database search,  
49 followed by manual filtering of search results. The Nexis database was searched for the presence of  
50 both the term '*obesity*' OR '*obese*' OR '*fat*' and the term '*child*' OR '*children*' OR '*kid*' OR '*kids*' within  
51 the headlines of articles published within the selected newspapers. The initial search returned 1199  
52  
53  
54  
55  
56  
57  
58  
59  
60

1  
2  
3 articles, which were subsequently subjected to manual application of exclusion criteria, including:  
4  
5 less than 50% of article content being relevant to childhood obesity; being a reader's letter; or being  
6  
7 part of television guide section. Following exclusion, the final sample comprised 757 relevant  
8  
9 articles.

### 10 11 12 *Coding*

13  
14 Article content was coded quantitatively using a coding frame adapted from one initially developed  
15  
16 by Hilton and colleagues (21). The adapted coding frame was developed to record media frames of  
17  
18 childhood obesity in terms of definitions of the problem, mentions of specific biological, individual  
19  
20 and societal drivers, and biological, individual and societal solutions (itemised in Table 2). In addition,  
21  
22 the coding frame recorded: whether the article was published on the front page of the publication;  
23  
24 the length of the article; and the tone of headline. Each headline was coded as alarmist, neutral or  
25  
26 reassuring. This code was based on the coders' interpretations of the editorial intent of the language  
27  
28 used, mindful of the distinction between a headline being 'alarmist' and 'alarming'. Therefore,  
29  
30 headlines that communicated potentially alarming news were not coded as 'alarmist' unless the  
31  
32 coder judged the language in the headline to have been chosen specifically to provoke alarm in the  
33  
34 reader. Coding was performed by AN and CP, and 10% of articles were double-coded blind to allow  
35  
36 inter-rater agreement to be calculated. Cohen's kappa values for agreement on individual codes are  
37  
38 listed in Table 2. The threshold for acceptable agreement was set at 0.61 (defined by Landis and  
39  
40 Koch as 'substantial' or better agreement (42)), and three codes were removed due to insufficient  
41  
42 agreement: dieting (such as fad diets) as a driver of childhood obesity; normalisation of obesity as a  
43  
44 driver of childhood obesity; and technological developments as a driver of childhood obesity.  
45  
46  
47

### 48 49 *Analysis*

50  
51 Statistical analysis was performed in STATA. Statistical procedures included: basic descriptive  
52  
53 statistics; Cohen's kappa test of inter-rater agreement;  $\chi^2$  tests of relationships between headline  
54  
55 tone, market and political alignment; linear regression of relationships between publication year and  
56  
57

1  
2  
3 mentions of different categories of drivers and solutions; and multiple logistic regression of  
4 relationships between political alignment and individual aspects of framing. The multiple logistic  
5 regressions were adjusted by publication market because the markets represented were not  
6 distributed evenly by political alignment (as is the case in the UK newspaper industry), and previous  
7 research has identified significant variation in health news coverage by publication market (e.g. 21,  
8 43, 44).

### 16 *Comparative analysis*

19 Data from Hilton and colleagues' previous study on representations of general (not childhood-  
20 specific) obesity in the UK media were also analysed which had been collected and described fully  
21 elsewhere(21) to enable comparison of newspaper representations of obesity in children with  
22 obesity in adults, and obesity coverage more generally. This direct comparison was enabled by the  
23 intentional similarity of the methods of data collection, coding and analysis in the two studies.

### 30 *Patient and Public Involvement*

33 Patient/public participants were not involved in this study.

## 36 **Results**

### 39 *Sample characteristics*

42 Table 1 summarises the political alignment and market of each publication in the sample, in addition  
43 to the frequency of articles and front-page articles within those publications, and the variation in  
44 word count within those articles. A total of 757 articles relevant to childhood obesity were identified  
45 within the selected six publications (five of which were combined with their corresponding Sunday  
46 counterparts). The frequency of coverage of childhood obesity varied between publications, ranging  
47 from the *Independent & Independent on Sunday* publishing 61 relevant articles, none of which were  
48 on front pages, to the *Mirror & Sunday Mirror*, which published 198 relevant articles, including two  
49  
50  
51  
52  
53  
54  
55  
56  
57

1  
2  
3 front-page articles. The Daily Telegraph & Sunday Telegraph afforded the issue the greatest  
4  
5 prominence, featuring it on their front pages nine times.  
6

7  
8 The changing frequency of relevant articles within the sample between 1996 and 2014 are illustrated  
9  
10 in Figure 1, both overall and within each political alignment. The total number of relevant articles  
11  
12 per year rose steadily from 2 in 1996 to a high of 82 in 2008, before declining to 40 in 2010, and  
13  
14 finally rising again to 69 articles in 2014. The peak from 2006-08 was contemporaneous with the  
15  
16 publication of the UK Government's Foresight project report on reducing obesity(8)and its  
17  
18 corresponding mid-term and one-year reviews.  
19

20  
21 **[Insert Figure 1. Frequency of articles by year]**  
22

#### 23 24 *Headline tone*

25  
26 Each article's headline was coded as either neutral (n=567, 74.9%), alarmist (n=165, 21.8%) or  
27  
28 reassuring (n=22, 2.9%) in tone. Alarmist headlines outnumbered reassuring headlines within each  
29  
30 publication and within each year, excluding 2001, in which three articles had reassuring headlines,  
31  
32 compared to two alarmist headlines. *The Daily Mail & Mail on Sunday* exhibited both the highest  
33  
34 proportion of alarmist headlines (n=43, 32.3%) and reassuring headlines (n=8, 6.0%). Headline tone  
35  
36 varied significantly by publication market ( $\chi^2(4)=28.6$ ,  $p<0.001$ ), with alarmist headlines most  
37  
38 common in tabloid publications (n=85, 51.5%). Headline tone did not vary significantly by political  
39  
40 alignment ( $\chi^2(2)=0.7$ ,  $p<0.698$ ).  
41  
42  
43

44  
45 **[Insert Table 1. Summary of article characteristics]**  
46

#### 47 48 *Definitions of the problem of childhood obesity*

49  
50 Table 2 illustrates the frequencies of articles mentioning specific problem definitions, drivers and  
51  
52 solutions related to childhood obesity, and Table 3 illustrates the extent to which publications'  
53  
54 political alignment predicted mentions of specific definitions. More than half of articles quantified  
55  
56  
57

1  
2  
3 childhood obesity prevalence within the UK (n=413 54.6%), and a similar proportion described  
4 obesity prevalence as rising, or having risen (n=389, 51.4%). Centre-right-aligned publications  
5 mentioned increasing prevalence significantly less frequently than centre-left publications (OR:0.59;  
6 p=0.001). Eighty (10.6%) articles quantified the prevalence of obesity outside of the UK.  
7  
8  
9  
10  
11 Approximately half of articles specifically described obesity as a health risk (n=397, 52.4%), and 102  
12 (13.5%) described it as a burden to the National Health Service, and each of these themes were  
13 more frequent in centre-left publications (OR:0.35, p=0.010; OR:0.50, p=0.008). Childhood obesity  
14 was characterised as an economic burden to society in 74 (9.8%) articles, and significantly more so in  
15 centre-left publications (OR:0.35, p=0.010).  
16  
17  
18  
19  
20  
21

22 **[Insert Table 2. Frequency of mentions of problem definitions, drivers, and categories of solutions]**

23  
24  
25 **[Insert Table 3. Likelihood of centre-right-aligned publications mentioning definitions of obesity]**

26  
27  
28 Few articles (n=23, 3.0%) characterised obesity as a cosmetic problem. Twice as many articles  
29 mentioned childhood obesity in relation to women and/or girls (n=112, 14.8%) as men and/or boys  
30 (n=56, 7.4%), and men and/or boys were more likely to be mentioned in centre-left publication than  
31 centre-right publications, after adjusting for market (OR:0.43, p=0.020).  
32  
33  
34  
35

### 36 *Presentations of potential drivers of, and solutions to, childhood obesity*

37  
38  
39  
40 Mentions of specific drivers of childhood obesity were coded and categorised as either individual  
41 (n=453, 59.8%), societal (n=214, 28.3%) or biological/genetic (n=70, 9.2%) drivers (Table 2). Societal  
42 drivers were mentioned more frequently in centre-left publications (OR:0.69, p=0.046). Frequently-  
43 mentioned individual drivers included parenting (n=246, 32.5%), diet (n=235, 31.0%) and insufficient  
44 exercise (n=224, 29.6%), while societal drivers included an abundance of unhealthy food (n=129,  
45 17.0%), marketing (n=90, 11.9%) and insufficient health services or facilities (n=53, 7.0%).  
46  
47  
48  
49  
50  
51  
52

53  
54 In addition to drivers, mentions of potential solutions to childhood obesity were coded into three  
55 corresponding categories: individual (n=276, 36.5%), societal (n=214, 28.3%) and biological (n=52,  
56  
57

1  
2  
3 6.9%) (Table 2). Table 4 illustrates the extent to which publications' political alignment predicted  
4 mentions of specific drivers and solutions. Centre-left publications were more likely to mention  
5 societal drivers (OR:0.69, p=0.046) and societal solutions (OR:0.54, p=0.046). Specific drivers that  
6 centre-left publications were more likely to mention included diet (OR:0.65, p=0.018), insufficient  
7 exercise (OR:0.67, p=0.032), and marketing (OR:0.55, p=0.030).  
8  
9  
10  
11  
12

13  
14 **[Insert Table 4. Likelihood of centre-right-aligned publications mentioning categories of driver and**  
15 **solution]**  
16

17  
18  
19 *Time trends in presentation of drivers and solutions*  
20

21  
22 Time trends in mentioning each category were analysed. Mentions of individual drivers (coefficient -  
23 0.068, p<0.001), individual solutions (coefficient -0.037, p=0.041), societal drivers (coefficient -0.097,  
24 p<0.001) and societal solutions (coefficient -0.044, p=0.012) each decreased significantly between  
25 1996 and 2014. Neither biological/genetic drivers (coefficient -0.014, p=0.637) nor biological  
26 solutions (coefficient -0.020, p=0.558) varied significantly across the sample period.  
27  
28  
29  
30  
31

32  
33 Figure 2 illustrates the trends in individual and societal drivers and solutions. Individual drivers were  
34 mentioned particularly frequently (82-100%) between 1998 and 2000, before declining to between  
35 46% and 67% of articles between 2004 and 2014. Mentions of individual solutions peaked at 83% in  
36 2000, and subsequently declined, comprising 25-38% articles between 2007 and 2014. Mentions of  
37 societal drivers peaked at 67% in 2000, followed by a lower peak of 61% in 2002 and a subsequent  
38 lengthy decline to a low of 8% in 2012. Mentions of societal solutions exhibited a less linear decline  
39 than other categories, with peaks in 1998 (73%), 2004 (71%) and 2008 (66%), interspersed with  
40 declines. Notably, societal solutions were more commonly mentioned than individual solutions from  
41 2007-2014.  
42  
43  
44  
45  
46  
47  
48  
49  
50  
51

1  
2  
3  
4  
5  
6 **[Insert Figure 2. Trends in individual and societal drivers and solutions]**  
7  
8  
9

10  
11 *Representations of childhood obesity in comparison to adult and general population obesity*  
12

13  
14 The data collected for this study were compared with data collected in Hilton and colleagues' 2012  
15 study of newspaper representations of obesity in the general population (21). Supporting  
16 information Figure S1 illustrates the yearly frequency of articles in each study's main sample, as well  
17 as a subsample of the previous study's data that excludes all articles that mentioned children. This  
18 represents a means of comparing representations of childhood obesity with representations of adult  
19 and non-age-specific obesity. Table S1 suggests that childhood obesity received less newspaper  
20 coverage than adult obesity in every year covered by the two datasets, with the exception of 1999.  
21 The longer time period represented in the current study suggests that the decrease in publication  
22 frequency in 2008-2010 observed in the previous study (21) did not continue in subsequent years, at  
23 least on the topic childhood obesity.  
24  
25  
26  
27  
28  
29  
30  
31  
32  
33  
34  
35

36 Supporting information Figure S2 illustrates the frequency of coverage of the two categories of  
37 driver and solution, individual and societal, within the present and prior sample (21). Comparison of  
38 the data indicates that coverage of childhood obesity was characterised by greater focus on  
39 individual drivers and societal solutions than coverage of adult obesity, while coverage of societal  
40 drivers and individual solutions was relatively similar.  
41  
42  
43  
44  
45  
46

47 **Discussion**  
48  
49

50 By systematically analysing the content of 757 articles, we arrived at several key findings related to  
51 UK national newspapers' representations of childhood obesity. Coverage of the issue grew steadily  
52 from 1996 to 2008, followed by a period of relatively infrequent coverage. Childhood obesity was  
53 predominantly characterised as driven by individual-level factors, particularly parenting, dietary  
54  
55  
56  
57  
58  
59  
60



1  
2  
3 behaviours and inactivity, though societal drivers such as marketing were also identified. Similarly,  
4  
5 there was greater focus on individual-level solutions than societal-level solutions. Societal  
6  
7 constructions of the drivers of, and solutions to, obesity, were significantly more frequent within  
8  
9 centre-left publications than centre-right. Analysis of time trends provided evidence of a small shift  
10  
11 towards societal conceptualisations, with mentions of social solutions outnumbering individual  
12  
13 solutions throughout the latter half of the sample period. Across the 19-year period studied, alarmist  
14  
15 headlines greatly outnumbered reassuring headlines, particularly in tabloid publications, and more  
16  
17 frequently in centre-right publications. Childhood obesity was frequently defined as a health risk in  
18  
19 approximately half of articles, and was associated with females substantially more frequently than  
20  
21 males, but more nuanced coding of gender-representation in these articles is required.  
22

23  
24 Centre-left publications' greater focus on societal constructions of the causes of, and solutions to  
25  
26 childhood obesity, and on the societal and health service burdens of childhood obesity, are in line  
27  
28 with the communal and individual framings associated with left- and right-wing political ideologies.  
29  
30 Entman describes the core process of building frames as "*[selecting] some aspects of a perceived*  
31  
32 *reality and [making] them more salient*"(16), and this process is evident in UK newspaper  
33  
34 representations of childhood obesity, with centre-left publications building frames that incorporate  
35  
36 societal aspects of the childhood obesity problem, while centre-right publications omit them.  
37  
38

39  
40 This research comprised a systematic analysis of a large sample of nineteen years of UK national  
41  
42 newspaper coverage, facilitating statistical understandings of media frames of childhood obesity,  
43  
44 including definitions, drivers and solutions. However, the research is subject to some limitations.  
45  
46 Using the *Nexis* database facilitates the systematic sampling of relevant newspaper content, but  
47  
48 necessitates relying on the integrity of the database; as such, it is possible that some trends  
49  
50 identified may be artefacts of inconsistencies in the database. The method allowed quantitative  
51  
52 analysis of a media frames across a large sample, but not the nuanced analysis of specific aspects of  
53  
54 framing that qualitative analysis would permit. The coding frame was extensive, but subject to  
55  
56  
57  
58  
59  
60

1  
2  
3 certain limitations. Coding did record the types of issues discussed by each articles, which may have  
4  
5 been valuable given the variety of different perspectives from which the issue may be viewed.  
6  
7 Further, while mentions of males and females in relation to obesity in children were coded, coding  
8  
9 did not differentiate between mentions of boys with obesity, girls with obesity, male parents and  
10  
11 female parents. Given the frequently gendered nature of societal discourse about obesity, future  
12  
13 research may benefit from analysing gendered representations of both children and parents within  
14  
15 news coverage of childhood obesity. Additionally, future research may benefit from widening the  
16  
17 search scope from childhood obesity to also cover childhood overweight. Further limitations of the  
18  
19 research stem from decisions made about the type of content analysed. The sole focus on article  
20  
21 text was at the cost of analysing images, which have been found to be an important aspect of media  
22  
23 representations of obesity (23, 31, 45, 46). Further, the focus on newspaper content was at the  
24  
25 expense of data from other news sources, such as television and online news. We argue that our  
26  
27 focus on the evolution of the debate over time is not well suited to the rapidly-changing online news  
28  
29 environment, but incorporating other news sources could be valuable as representations of  
30  
31 childhood obesity have been found to vary by medium in the US(34). Finally, while links between  
32  
33 media representations and public perceptions are well established, content analysis can only  
34  
35 describe content, not determine how that content is received by audiences.  
36  
37

38  
39 This research built upon prior research examining media framing of general obesity (21) by  
40  
41 extending the time period covered, taking a sole focus on childhood obesity, and comparing  
42  
43 coverage of childhood obesity to that of obesity in general. As would be expected, the growth in  
44  
45 coverage of childhood obesity from 1996 to 2008 identified in our prior research(21) was replicated  
46  
47 in the present research, but it was found that the rise did not continue beyond 2008. As mentioned  
48  
49 above, observed trends in data may be artefacts of inconsistencies in the *Nexis* database, but in the  
50  
51 case of observed trends in overall article frequency, these are unlikely to be due to systematic  
52  
53 inconsistencies in the database because the peaks and troughs in reporting were not uniform  
54  
55 between publications, and the substantial reductions in article frequency cannot be explained by  
56  
57

1  
2  
3 gaps in specific publications' archives .One potential explanation for a reduction in coverage  
4  
5 subsequent to 2008 is that coverage of childhood obesity in 2007-8 was elevated due to  
6  
7 dissemination of, and activities related to, the UK Government's Foresight report *Reducing obesity:*  
8  
9 *future choices*, published in October 2007(8).Further research might investigate whether the  
10  
11 increase in article frequency in the final year of the study period is indicative of a prolonged rise in  
12  
13 coverage beyond 2014. Both the original study by Hilton and colleagues and the present study  
14  
15 present some evidence of a shift away from a focus on individual constructions of drivers and  
16  
17 solutions across their respective time periods. However, comparison of the two pieces of research  
18  
19 suggests that, in comparison to general obesity, framings of childhood obesity have a greater  
20  
21 tendency to attribute responsibility to individuals. The disproportionate individual-level framing of  
22  
23 childhood obesity might be explained by the presence of parents as mediators between children and  
24  
25 public policy. While children are vulnerable to societal and environmental pressures, and are often  
26  
27 publicly viewed as deserving of legislative protection(47, 48, 49), public discourse around childhood  
28  
29 obesity may attribute greater individual responsibility to parents(50). Hawkins and Linvill found that  
30  
31 US news frequently identifies parents as both responsible for, and responsible for addressing,  
32  
33 children's obesity, and conclude that this framing represents an obstacle to stimulating demand for  
34  
35 a public policy response to the problem (35). Boero's qualitative analysis of US media  
36  
37 representations of childhood obesity identifies parents, and particularly mothers, as being 'under  
38  
39 fire' for failing to foster healthy behaviours in their children(28). Unlike in debates around unhealthy  
40  
41 phenomena such as exposure to second-hand smoke, in which an adult lifestyle product may be  
42  
43 perceived as unfairly invading children's spaces, feeding children occupies a complex position of  
44  
45 being nurturing and essential, while also being a potential source of long-term health harms(50).  
46  
47  
48  
49  
50 The growth and decline in overall coverage of childhood obesity identified in the present study  
51  
52 mirrored that found in Barry and colleagues'(34) content analysis of US television and print news  
53  
54 coverage of childhood obesity suggesting that, despite locally-relevant policy events, trends in  
55  
56 coverage of childhood obesity may follow transnational patterns. Barry and colleagues (34) suggest  
57  
58  
59  
60

1  
2  
3 that the decline in coverage may be an example of Downs' (51) "issue attention cycle", in which  
4 public attention to a specific issue will inevitably decline regardless of whether that issue reaches  
5 any conclusion. However, one area where our findings depart from those of Barry and colleagues  
6 (34) is in individual and structural causes of childhood obesity, which they found to be equally  
7 frequent within the newspaper articles in the their sample.  
8  
9  
10  
11  
12

13  
14 For media content to drive public appetite for policy solutions to childhood obesity, media must  
15 both raise perceptions of the issue, through heightened coverage, and frame the issue as one  
16 demanding societal level, rather than solely individual-level, solutions. Our research demonstrates  
17 that, while the salience of childhood obesity in UK national newspapers rose steadily from 1996-  
18 2008, that level of attention was not maintained subsequent to 2008, although there is reason to  
19 suggest that this may change in 2017/18 with media coverage of the incoming levy on sugar  
20 sweetened beverages in the UK. While this faltering frequency of reporting may be undesirable for  
21 raising public consciousness, our analysis suggests that the frames constructed within those later  
22 years were characterised by a predominance of social solutions over individual solutions, which, if  
23 internalised by audiences, may stimulate public appetites for engaging the problem at the public  
24 policy level. Notably, this shift from individual to social framing occurred despite the well-  
25 documented complications caused by parents' roles as mediators between public policy and  
26 children's health behaviours. Taking these key findings into account, this study supports a mixed  
27 view of UK media framing of childhood obesity, in which positive changes in framing may be  
28 undermined by a decrease in salience. Those advocating for public policy responses to childhood  
29 obesity may seek to raise the issue's media profile, while continuing to promote social framings.  
30  
31  
32  
33  
34  
35  
36  
37  
38  
39  
40  
41  
42  
43  
44  
45  
46  
47  
48  
49  
50  
51  
52  
53  
54  
55  
56  
57  
58  
59  
60

**Author Statement**

SH, CP and AN: study planning and conceptualisation; AN and CP: data coding; CP and AN: data analysis; AN and CP: drafting manuscript; SH: critical review of the manuscript.

**Data Statement**

Data were accessed from the Nexis newspaper database at <https://www.nexis.com>

For peer review only

## TABLES:

Table 1. Summary of article characteristics

| Publication                         | Political alignment | Market        | All articles |              | Front-page articles |            | Word count   |            |              |
|-------------------------------------|---------------------|---------------|--------------|--------------|---------------------|------------|--------------|------------|--------------|
|                                     |                     |               | n            | %*           | n                   | %**        | 1st quartile | Median     | 3rd quartile |
| Guardian & Observer                 | Centre-left         | Quality       | 109          | 14.4         | 5                   | 4.6        | 457          | 680        | 907          |
| Independent & Independent on Sunday | Centre-left         | Quality       | 61           | 8.1          | 0                   | -          | 247          | 474        | 690          |
| Mirror & Sunday Mirror Daily        | Centre-left         | Tabloid       | 198          | 26.2         | 2                   | 1.0        | 121          | 219        | 459          |
| Telegraph & Sunday Telegraph        | Centre-right        | Quality       | 107          | 14.1         | 9                   | 8.4        | 182          | 346        | 502          |
| Daily Mail & Mail on Sunday         | Centre-right        | Middle-market | 134          | 17.7         | 6                   | 4.5        | 263          | 438        | 672          |
| Sun                                 | Centre-right        | Tabloid       | 148          | 19.6         | 0                   | -          | 98           | 195        | 337          |
| <b>Total</b>                        |                     |               | <b>757</b>   | <b>100.0</b> | <b>22</b>           | <b>2.9</b> | <b>151</b>   | <b>325</b> | <b>595</b>   |

\*percentage within whole sample

\*\*percentage of front-page articles within publication

Table 2. Frequency of mentions of problem definitions, drivers, and categories of solutions

| Theme                                                | Total (n=757) |      | Inter-rater agreement* |
|------------------------------------------------------|---------------|------|------------------------|
|                                                      | n             | %    |                        |
| <b>Problem definitions</b>                           |               |      |                        |
| Quantifies obesity prevalence within the UK          | 413           | 54.6 | 0.834                  |
| Quantifies obesity prevalence elsewhere              | 80            | 10.6 | 0.814                  |
| Mentions increase in obesity rates                   | 389           | 51.4 | 0.940                  |
| Mentions obesity as a risk to health                 | 397           | 52.4 | 0.893                  |
| Mentions obesity as a cosmetic problem               | 23            | 3.0  | 0.850                  |
| Mentions obesity as a burden to NHS                  | 102           | 13.5 | 0.814                  |
| Mentions obesity as an economic burden to society    | 32            | 4.2  | 0.630                  |
| Mentions socio-economic and geographical differences | 74            | 9.8  | 0.706                  |
| Mentions women and/or girls                          | 112           | 14.8 | 0.706                  |
| Mentions men and/or boys                             | 56            | 7.4  | 0.706                  |
| Obesity is not a problem, over-hyped etc.            | 93            | 12.3 | 0.850                  |
| Mentions discrimination, bullying or stigmatisation  | 70            | 9.2  | 1.000                  |
| <b>Drivers of obesity</b>                            |               |      |                        |
| <i>Overall drivers</i>                               |               |      |                        |
| Any drivers mentioned                                | 522           | 69.0 | n/a**                  |
| Any biological/genetic driver mentioned              | 70            | 9.2  | n/a**                  |
| Any individual driver mentioned                      | 453           | 59.8 | n/a**                  |
| Any societal driver mentioned                        | 214           | 28.3 | n/a**                  |
| <i>Individual drivers</i>                            |               |      |                        |
| Mentions poor diet, overeating                       | 235           | 31.0 | 0.857                  |
| Mentions poor self-control, willpower or choices     | 60            | 7.9  | 0.680                  |
| Mentions insufficient exercise, sedentary lifestyle  | 224           | 29.6 | 0.919                  |
| Mentions parenting shortcomings                      | 246           | 32.5 | 0.939                  |
| <i>Societal drivers</i>                              |               |      |                        |
| Mentions an abundance of processed/fast food         | 129           | 17.0 | 0.752                  |
| Mentions a lack of health services or facilities     | 53            | 7.0  | 0.945                  |
| Mentions food/drink advertising and promotions       | 90            | 11.9 | 1.000                  |
| <b>Solutions to obesity</b>                          |               |      |                        |
| Any solution mentioned                               | 538           | 71.1 | n/a**                  |
| Individual solution mentioned                        | 276           | 36.5 | 0.920                  |
| Societal solution mentioned                          | 214           | 28.3 | 0.839                  |
| Biological solution mentioned                        | 52            | 6.9  | 1.000                  |

\*Cohen's kappa test of inter-rater agreement.

\*\*Agreement was not calculated for these variables as they were computed from other, manually-coded variables

Table 3. Likelihood of centre-right-aligned publications mentioning definitions of obesity

|                                                             | Unadjusted |           |              | Adjusted* |           |              |
|-------------------------------------------------------------|------------|-----------|--------------|-----------|-----------|--------------|
|                                                             | OR         | 95% CI    | P-value      | OR        | 95% CI    | P-value      |
| <b>Problem definitions</b>                                  |            |           |              |           |           |              |
| <i>Quantifies obesity prevalence within the UK</i>          | 0.97       | 0.73-1.30 | 0.858        | 0.92      | 0.67-1.27 | 0.608        |
| <i>Quantifies obesity prevalence elsewhere</i>              | 0.63       | 0.40-1.01 | 0.057        | 0.59      | 0.34-1.03 | 0.065        |
| <i>Mentions increase in obesity rates</i>                   | 0.70       | 0.52-0.93 | <b>0.014</b> | 0.59      | 0.42-0.81 | <b>0.001</b> |
| <i>Mentions obesity as a risk to health</i>                 | 1.02       | 0.77-1.36 | 0.885        | 0.88      | 0.64-1.22 | 0.456        |
| <i>Mentions obesity as a cosmetic problem</i>               | 0.40       | 0.16-0.99 | <b>0.048</b> | 0.35      | 0.11-1.05 | 0.061        |
| <i>Mentions obesity as a burden to NHS</i>                  | 0.57       | 0.37-0.87 | <b>0.009</b> | 0.50      | 0.30-0.83 | <b>0.008</b> |
| <i>Mentions obesity as an economic burden to society</i>    | 0.36       | 0.19-0.70 | <b>0.003</b> | 0.35      | 0.16-0.78 | <b>0.010</b> |
| <i>Mentions socio-economic and geographical differences</i> | 0.62       | 0.38-1.00 | 0.051        | 0.85      | 0.51-1.43 | 0.547        |
| <i>Mentions women and/or girls</i>                          | 0.86       | 0.58-1.29 | 0.467        | 0.77      | 0.48-1.23 | 0.271        |
| <i>Mentions men and/or boys</i>                             | 0.59       | 0.34-1.03 | 0.062        | 0.43      | 0.22-0.88 | <b>0.020</b> |
| <i>Obesity is not a problem, over-hyped etc.</i>            | 0.75       | 0.29-1.93 | 0.552        | 0.73      | 0.25-2.15 | 0.565        |
| <i>Mentions discrimination, bullying or stigmatisation</i>  | 0.56       | 0.36-0.87 | <b>0.010</b> | 0.44      | 0.25-0.76 | <b>0.003</b> |

\*Adjusted for publication market



Table 4. Likelihood of centre-right-aligned publications mentioning categories of driver and solution

|                                                            | Unadjusted |           |              | Adjusted* |           |              |
|------------------------------------------------------------|------------|-----------|--------------|-----------|-----------|--------------|
|                                                            | OR         | 95% CI    | P-value      | OR        | 95% CI    | P-value      |
| <b>Drivers of obesity</b>                                  |            |           |              |           |           |              |
| Overall drivers                                            |            |           |              |           |           |              |
| <i>Any drivers mentioned</i>                               |            |           |              |           |           |              |
|                                                            | 0.90       | 0.66-1.23 | 0.505        | 0.78      | 0.56-1.10 | 0.162        |
| <i>Any biological/genetic driver mentioned</i>             |            |           |              |           |           |              |
|                                                            | 0.73       | 0.45-1.20 | 0.214        | 0.85      | 0.49-1.46 | 0.557        |
| <i>Any individual driver mentioned</i>                     |            |           |              |           |           |              |
|                                                            | 1.00       | 0.75-1.34 | 0.974        | 0.84      | 0.61-1.16 | 0.292        |
| <i>Any societal driver mentioned</i>                       |            |           |              |           |           |              |
|                                                            | 0.62       | 0.45-0.86 | <b>0.004</b> | 0.69      | 0.48-0.99 | <b>0.046</b> |
| Individual drivers                                         |            |           |              |           |           |              |
| <i>Mentions poor diet, overeating</i>                      |            |           |              |           |           |              |
|                                                            | 0.73       | 0.54-0.99 | <b>0.045</b> | 0.65      | 0.46-0.93 | <b>0.018</b> |
| <i>Mentions poor self-control, willpower or choices</i>    |            |           |              |           |           |              |
|                                                            | 0.61       | 0.35-1.04 | 0.068        | 0.71      | 0.39-1.28 | 0.255        |
| <i>Mentions insufficient exercise, sedentary lifestyle</i> |            |           |              |           |           |              |
|                                                            | 0.75       | 0.55-1.03 | 0.077        | 0.67      | 0.47-0.97 | <b>0.032</b> |
| <i>Mentions parenting shortcomings</i>                     |            |           |              |           |           |              |
|                                                            | 1.14       | 0.84-1.55 | 0.386        | 1.08      | 0.77-1.52 | 0.660        |
| Societal drivers                                           |            |           |              |           |           |              |
| <i>Mentions an abundance of processed/fast food</i>        |            |           |              |           |           |              |
|                                                            | 0.61       | 0.41-0.89 | <b>0.011</b> | 0.73      | 0.48-1.12 | 0.153        |
| <i>Mentions a lack of health services or facilities</i>    |            |           |              |           |           |              |
|                                                            | 0.90       | 0.52-1.58 | 0.725        | 0.87      | 0.46-1.65 | 0.671        |
| <i>Mentions food/drink advertising and promotions</i>      |            |           |              |           |           |              |
|                                                            | 0.56       | 0.36-0.88 | <b>0.012</b> | 0.55      | 0.32-0.94 | <b>0.030</b> |
| <b>Solutions to obesity</b>                                |            |           |              |           |           |              |
| <i>Biological</i>                                          |            |           |              |           |           |              |
|                                                            | 0.73       | 0.42-1.29 | 0.286        | 0.54      | 0.26-1.09 | 0.087        |
| <i>Individual</i>                                          |            |           |              |           |           |              |
|                                                            | 0.90       | 0.67-1.20 | 0.464        | 0.90      | 0.64-1.25 | 0.527        |
| <i>Societal</i>                                            |            |           |              |           |           |              |
|                                                            | 0.62       | 0.46-0.83 | <b>0.001</b> | 0.54      | 0.39-0.75 | <b>0.000</b> |

\*Adjusted for publication market

1  
2  
3  
4  
5  
6  
7  
8  
9  
10  
11  
12  
13  
14  
15  
16  
17  
18  
19  
20  
21  
22  
23  
24  
25  
26  
27  
28  
29  
30  
31  
32  
33  
34  
35  
36  
37  
38  
39  
40  
41  
42  
43  
44  
45  
46  
47  
48  
49  
50  
51  
52  
53  
54  
55  
56  
57  
58  
59  
60

For peer review only

## References

1. Ebbeling CB, Pawlak DB, Ludwig DS. Childhood obesity: public-health crisis, common sense cure. *Lancet* 2002;**360**: 473-482.
2. Ng M, Fleming T, Robinson M, Thomson B, Graetz N, Margono C, *et al*. Global, regional, and national prevalence of overweight and obesity in children and adults during 1980–2013: a systematic analysis for the Global Burden of Disease Study 2013. *Lancet* 2014;**384**: 766-781.
3. NHS Digital. Statistics on Obesity, Physical Activity and Diet. 2017.
4. Scottish Government. The Scottish Health Survey: 2015 edition. Scottish Government: Edinburgh, 2015.
5. Simmonds M, Llewellyn A, Owen CG, Woolacott N. Predicting adult obesity from childhood obesity: a systematic review and meta-analysis. *Obesity Reviews* 2016;**17**: 95-107.
6. HM Government. Childhood obesity: a plan for action. 2017.
7. Scottish Government. Increase the proportion of healthy weight children 2016 [4th August 2017]. Available from: <http://www.gov.scot/About/Performance/scotPerforms/indicator/healthyweight>.
8. Butland B, Jebb S, Kopelman P, McPherson K, Thomas S, Mardell J, *et al*. Foresight. Tackling Obesities: Future Choices - Project report. Government Office for Science: London, 2007.
9. Friedman DA. Public health regulation and the limits of paternalism. *Conn L Rev* 2013;**46**: 1687.
10. Swinburn BA, Sacks G, Hall KD, McPherson K, Finegood DT, Moodie ML, *et al*. The global obesity pandemic: shaped by global drivers and local environments. *Lancet* 2011;**378**: 804-814.
11. Swinburn BA. Obesity prevention: the role of policies, laws and regulations. *Australia and New Zealand health policy* 2008;**5**: 12.
12. Hilbert A, Rief W, Braehler E. What determines public support of obesity prevention? *J Epidemiol Community Health* 2007;**61**: 585.
13. Evans WD, Finkelstein EA, Kamerow DB, Renaud JM. Public perceptions of childhood obesity. *Am J Prev Med* 2005;**28**: 26-32.

- 1
- 2
- 3 14. McCombs ME, Shaw DL. The agenda-setting function of mass media. *Public Opin Q* 1972;**36**:  
4 176-187.
- 5
- 6
- 7 15. Scheufele DA, Tewksbury D. Framing, agenda setting, and priming: The evolution of three  
8 media effects models. *J Commun* 2007;**57**: 9-20.
- 9
- 10
- 11 16. Entman RM. Framing: Toward clarification of a fractured paradigm. *J Commun* 1993;**43**: 51-  
12 58.
- 13
- 14
- 15 17. Barry CL, Brescoll VL, Gollust SE. Framing Childhood Obesity: How Individualizing the  
16 Problem Affects Public Support for Prevention. *Polit Psychol* 2013: n/a-n/a.
- 17
- 18
- 19 18. Gollust SE, Niederdeppe J, Barry CL. Framing the Consequences of Childhood Obesity to  
20 Increase Public Support for Obesity Prevention Policy. *Am J Public Health* 2013;**103**: e96-  
21 e102.
- 22
- 23
- 24 19. Barry CL, Brescoll VL, Brownell KD, Schlesinger M. Obesity Metaphors: How Beliefs about the  
25 Causes of Obesity Affect Support for Public Policy. *Milbank Q* 2009;**87**: 7-47.
- 26
- 27
- 28 20. Boyce T. The media and obesity. *Obesity Reviews* 2007;**8**: 201-205.
- 29
- 30
- 31 21. Hilton S, Patterson C, Teyhan A. Escalating coverage of obesity in UK newspapers: the  
32 evolution and framing of the "obesity epidemic" from 1996 to 2010. *Obes* 2012;**20**: 1688-  
33 1695.
- 34
- 35
- 36 22. Hilbert A, Ried J. Obesity in Print: An Analysis of Daily Newspapers. *Obesity Facts* 2009;**2**: 46-  
37 51.
- 38
- 39
- 40 23. Patterson C, Hilton S. Normalisation and Stigmatisation of Obesity in UK Newspapers: a  
41 Visual Content Analysis. *The Open Obesity Journal* 2013;**5**: 82-91.
- 42
- 43
- 44 24. Flint SW, Hudson J, Lavalley D. The portrayal of obesity in UK national newspapers. *Stigma  
45 and Health* 2016;**1**: 16.
- 46
- 47
- 48 25. Islam S, Fitzgerald L. Indigenous obesity in the news: a media analysis of news  
49 representation of obesity in Australia's Indigenous population. *BMC obesity* 2016;**3**: 30.
- 50
- 51
- 52 26. Atanasova D. Obesity frames in British and German online newspapers, 2009-2011:  
53 Department of Media and Communication; 2015.
- 54
- 55
- 56 27. Bonfiglioli C. Overweight and Obesity in TV News. *Values and Choices in Television  
57 Discourse*. Springer, 2015, pp 87-108.
- 58
- 59
- 60

- 1  
2  
3  
4 28. Boero N. All the news that's fat to print: the American "obesity epidemic" and the media. *Qualitative Sociology* 2007;**30**: 41-60.  
5  
6  
7  
8 29. Lawrence RG. Framing obesity: The evolution of news discourse on a public health issue. *Harvard International Journal of Press/Politics* 2004;**9**: 56-75.  
9  
10  
11 30. Kim S-H, Willis LA. Talking about Obesity: News Framing of Who Is Responsible for Causing  
12 and Fixing the Problem. *Journal of Health Communication* 2007;**12**: 359-376.  
13  
14  
15 31. Gollust SE, Eboh I, Barry CL. Picturing obesity: Analyzing the social epidemiology of obesity  
16 conveyed through US news media images. *Soc Sci Med* 2012;**74**: 1544-1551.  
17  
18  
19 32. Jeong M, Gilmore JS, Bleakley A, Jordan A. Local news media framing of obesity in the  
20 context of a sugar-sweetened beverage reduction media campaign. *Journal of nutrition*  
21 *education and behavior* 2014;**46**: 583-588.  
22  
23  
24 33. Varava K. Visual framing, stigmatization, race, and obesity: Examining television news  
25 presentation of stories about obesity and stories about health. *Communication Studies*  
26 2016;**67**: 509-529.  
27  
28  
29 34. Barry CL, Jarlenski M, Grob R, Schlesinger M, Gollust SE. News media framing of childhood  
30 obesity in the United States from 2000 to 2009. *Pediatrics* 2011;**128**: 132-145.  
31  
32  
33 35. Hawkins KW, Linvill DL. Public health framing of news regarding childhood obesity in the  
34 United States. *Health communication* 2010;**25**: 709-717.  
35  
36  
37 36. Kalin SR, Fung TT. Comparison of child obesity prevention and control content in mainstream  
38 and Spanish-language US parenting magazines. *Journal of the Academy of Nutrition and*  
39 *Dietetics* 2013;**113**: 133-140.  
40  
41  
42 37. Bastian A. Representations of childhood obesity in Australian newsprint media and academic  
43 literature. *Aust N Z J Public Health* 2011;**35**: 135-139.  
44  
45  
46 38. Maher J, Fraser S, Wright J. Framing the mother: childhood obesity, maternal responsibility  
47 and care. *J Gend Stud* 2010;**19**: 233-247.  
48  
49  
50 39. Boero N. Obesity in the media: Social science weighs in. *Critical Public Health* 2013;**23**: 371-  
51 380.  
52  
53  
54 40. Douglas F, Clark J, Craig L, Campbell J, McNeill G. "It's a balance of just getting things right":  
55 mothers' views about pre-school childhood obesity and obesity prevention in Scotland. *BMC*  
56 *public health* 2014;**14**: 1009.  
57

- 1  
2  
3  
4 41. Press Gazette. National newspaper print ABCs for Jan 2017: Times and Observer both boost  
5 print sales year on year 2017 [cited 2017 2nd August 2017]. Available from:  
6 [http://www.pressgazette.co.uk/national-newspaper-print-abcs-for-jan-2017-observer-up-  
8 year-on-year-the-sun-is-fastest-riser-month-on-month/](http://www.pressgazette.co.uk/national-newspaper-print-abcs-for-jan-2017-observer-up-<br/>7 year-on-year-the-sun-is-fastest-riser-month-on-month/).  
9
- 10 42. Landis JR, Koch GG. The measurement of observer agreement for categorical data *Biometrics*  
11 1977;**33**: 159-174.  
12
- 13 43. Patterson C, Semple S, Wood K, Duffy S, Hilton S. A quantitative content analysis of UK  
14 newsprint coverage of proposed legislation to prohibit smoking in private vehicles carrying  
15 children. *BMC Public Health* 2015;**15**: 760.  
16
- 17 44. Patterson C, Katikireddi SV, Wood K, Hilton S. Representations of minimum unit pricing for  
18 alcohol in UK newspapers: a case study of a public health policy debate. *J Public Health*  
19 2014;**37**: 40-49.  
20
- 21 45. Heuer CA, McClure KJ, Puhl RM. Obesity stigma in online news: A visual content analysis.  
22 *Journal of Health Communication* 2011;**16**: 976-987.  
23
- 24 46. McClure KJ, Puhl RM, Heuer CA. Obesity in the news: Do photographic images of obese  
25 persons influence antifat attitudes? *Journal of health communication* 2011;**16**: 359-371.  
26
- 27 47. Schneider A, Ingram H. Social construction of target populations: Implications for politics and  
28 policy. *Am Polit Sci Rev* 1993: 334-347.  
29
- 30 48. Freeman B, Chapman S, Storey P. Banning smoking in cars carrying children: an analytical  
31 history of a public health advocacy campaign. *Aust N Z J Public Health* 2008;**32**: 60-65.  
32
- 33 49. Hilton S, Wood K, Bain J, Patterson C, Duffy S, Semple S. Newsprint coverage of smoking in  
34 cars carrying children: a case study of public and scientific opinion driving the policy debate.  
35 *BMC Public Health* 2014;**14**: 1116.  
36
- 37 50. Schwartz MB, Puhl R. Childhood obesity: a societal problem to solve. *Obesity reviews* 2003;**4**:  
38 57-71.  
39
- 40 51. Downs A. Up and down with ecology: the "issue-attention cycle". *The public* 1972.  
41  
42  
43  
44  
45  
46  
47  
48  
49  
50  
51  
52  
53  
54  
55  
56  
57  
58  
59  
60

1  
2  
3  
4  
5  
6  
7  
8  
9  
10  
11  
12  
13  
14  
15  
16  
17  
18  
19  
20  
21  
22  
23  
24  
25  
26  
27  
28  
29  
30  
31  
32  
33  
34  
35  
36  
37  
38  
39  
40  
41  
42  
43  
44  
45  
46  
47  
48  
49  
50  
51  
52  
53  
54  
55  
56  
57  
58  
59  
60

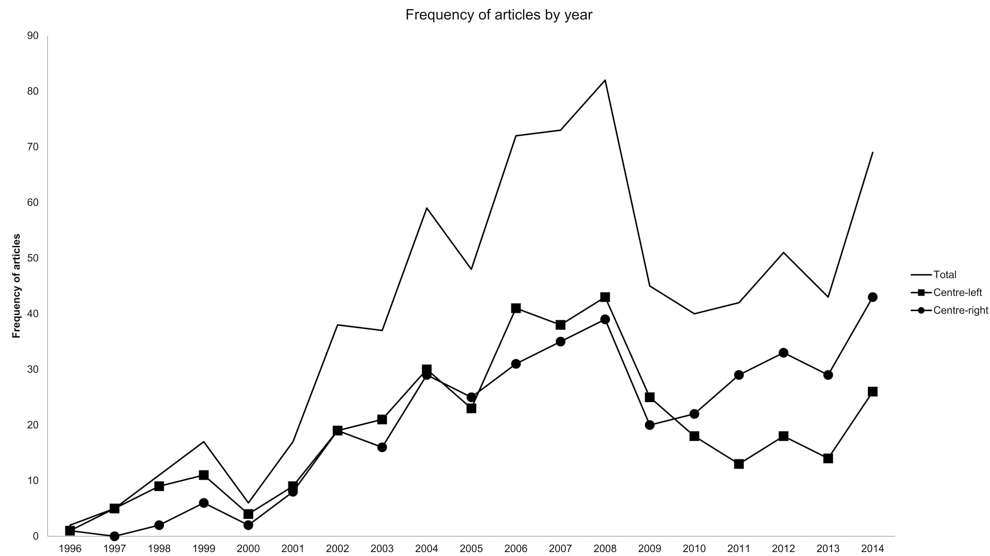

Figure 1. Frequency of articles by year

84x47mm (300 x 300 DPI)

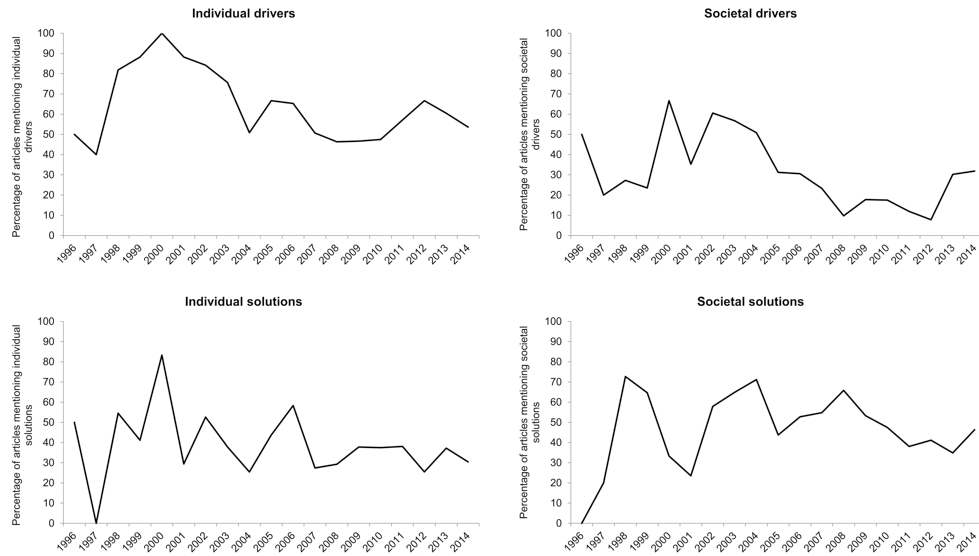

Figure 2. Trends in individual and societal drivers and solutions

84x47mm (300 x 300 DPI)



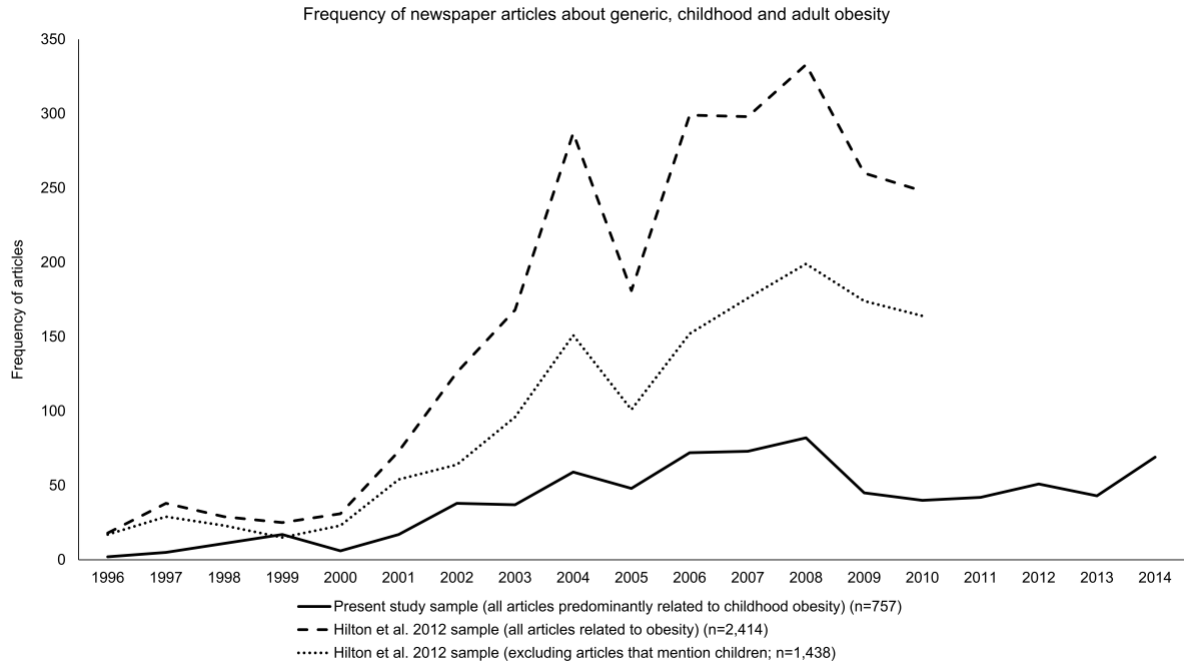

Proportion of articles within years mentioning different categories of drivers and solutions within articles about generic, childhood and adult obesity

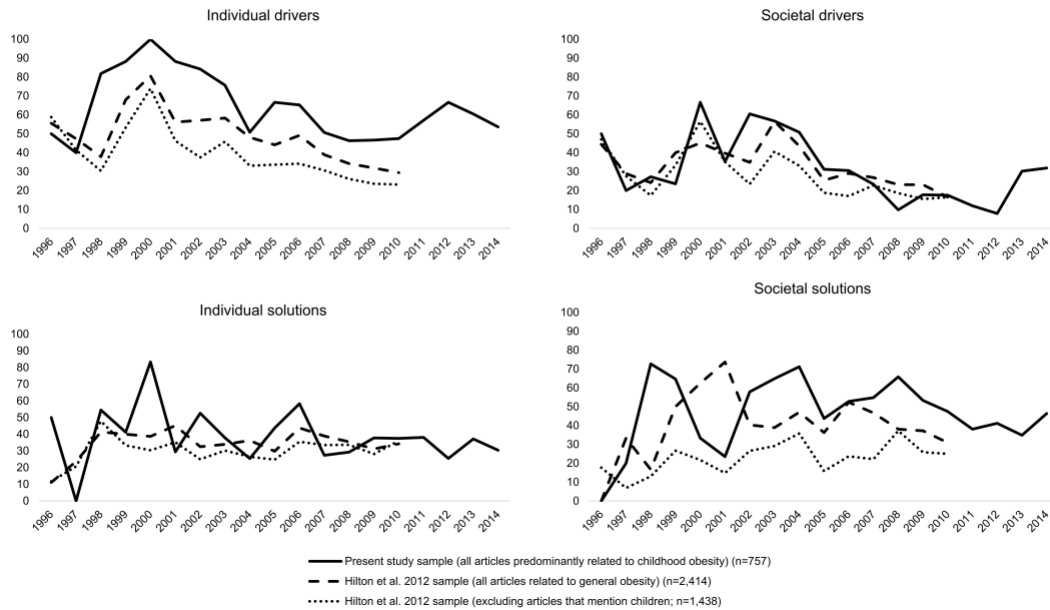

# BMJ Open

## Media framing of childhood obesity: a content analysis of UK newspapers from 1996-2014

|                                 |                                                                                                                                                                                                                                                              |
|---------------------------------|--------------------------------------------------------------------------------------------------------------------------------------------------------------------------------------------------------------------------------------------------------------|
| Journal:                        | <i>BMJ Open</i>                                                                                                                                                                                                                                              |
| Manuscript ID                   | bmjopen-2018-025646.R1                                                                                                                                                                                                                                       |
| Article Type:                   | Research                                                                                                                                                                                                                                                     |
| Date Submitted by the Author:   | 07-Jan-2019                                                                                                                                                                                                                                                  |
| Complete List of Authors:       | Nimegeer, Amy; Glasgow University, MRC/CSO Social and Public Health Sciences<br>Patterson, Chris; University of Glasgow, MRC/CSO Social & Public Health Sciences Unit<br>Hilton , Shona; University of Glasgow, MRC/CSO Social & Public Health Sciences Unit |
| <b>Primary Subject Heading</b>: | Communication                                                                                                                                                                                                                                                |
| Secondary Subject Heading:      | Sociology, Public health                                                                                                                                                                                                                                     |
| Keywords:                       | Health policy < HEALTH SERVICES ADMINISTRATION & MANAGEMENT, MEDICAL JOURNALISM, Community child health < PAEDIATRICS, PAEDIATRICS, PUBLIC HEALTH, STATISTICS & RESEARCH METHODS                                                                             |
|                                 |                                                                                                                                                                                                                                                              |

SCHOLARONE™  
Manuscripts

1  
2  
3 **TITLE:** Media framing of childhood obesity: a content analysis of UK newspapers from 1996-2014  
4  
5

6 **AUTHORS:** Amy Nimegeer<sup>1</sup>, Chris Patterson<sup>1</sup>, Shona Hilton<sup>1</sup>  
7  
8

9 **AFFILIATION:** <sup>1</sup>MRC/CSO Social and Public Health Sciences Unit, University of Glasgow, 200 Renfield  
10 Street, Glasgow, G2 3QB, United Kingdom  
11  
12

13  
14 **KEYWORDS:** Obesity, Children, Media, content analysis  
15  
16

17 **RUNNING TITLE:** UK Media framing of childhood obesity  
18  
19

20 **CONTACT INFORMATION:**

21 Dr Amy Nimegeer, MRC/CSO Social and Public Health Sciences Unit, University of Glasgow, 200  
22 Renfield Street, Glasgow, G2 3QB, United Kingdom  
23

24 [amy.nimegeer@glasgow.ac.uk](mailto:amy.nimegeer@glasgow.ac.uk)  
25

26  
27 Emails for additional authors: [chris.patterson@glasgow.ac.uk](mailto:chris.patterson@glasgow.ac.uk) ; [shona.hilton@glasgow.ac.uk](mailto:shona.hilton@glasgow.ac.uk)  
28  
29

30 **WORD COUNT (excluding cover page, abstract, references, tables, and figures):** 4166  
31  
32  
33  
34  
35  
36  
37  
38  
39  
40  
41  
42  
43  
44  
45  
46  
47  
48  
49  
50  
51  
52  
53  
54  
55  
56  
57  
58  
59  
60

## Abstract

*Background:* Media can influence public and policymakers' perceptions of causes of, and solutions to, public health issues through selective presentation and framing. Childhood obesity is a health issue with both individual- and societal-level drivers and solutions, but public opinion and mass media representations of obesity have typically focused on individual-level framings, at the cost of acknowledgement of a need for regulatory action.

*Objective and Setting:* To understand the salience and framing of childhood obesity across 19 years of UK national newspaper content.

*Design and Outcome Measures:* Quantitative content analysis of 757 articles about childhood obesity obtained from six daily and five Sunday newspapers. Articles were coded manually for definitions, drivers and potential solutions. Data were analysed statistically, including analysis of time trends and variations by political alignment of source.

*Results:* The frequency of articles grew from a low of two in 1996 to a peak of 82 in 2008, before declining to 40 in 2010. Individual-level drivers (59.8%) and solutions (36.5%) were mentioned more frequently than societal-level drivers (28.3%) and solutions (28.3%) across the sample, but societal solutions were mentioned more frequently during the final eight years, coinciding with a marked decline in yearly frequency of articles.

*Conclusions:* Increased focus on societal solutions aligns with public health goals, but coincided with a reduction in the issue's salience in the media. Those advocating public policy solutions to childhood obesity may benefit from seeking to raise the issue's media profile while continuing to promote structural conceptualisations of childhood obesity.

## Article Summary

### *Strengths and Limitations of this Study*

#### **Strengths**

- Methodology includes systematic analysis of a large sample of nineteen years of UK national newspaper coverage, facilitating statistical understandings of media frames of childhood obesity, including definitions, drivers and solutions
- Features robust manual coding and links to pre-existing dataset to strengthen analysis

#### **Weaknesses**

- Quantitative media content analysis is inherently less sensitive to nuance than qualitative analysis, and our analysis excluded some aspects of media content, such as images, which may influence readers' interpretations of the text they accompany
- Content analysis is a means of documenting what messages are presented by media, but cannot tell us how these messages are received by audiences

#### **Funding Statement**

AN, CP and SH's time for this research was funded by the Informing Healthy Public Policy programme (MC\_UU\_12017-15 and SPHSU15) of the MRC/CSO Social and Public Health Sciences Unit, University of Glasgow. The funding bodies had no role in the design, collection, analysis or interpretation of this study.

#### **Competing Interests**

SH, CP and AN declare no conflicts of interest.

#### **Acknowledgements**

1  
2  
3 The authors would like to thank Dr Jonathan Olsen of the MRC/CSO Social and Public Health Sciences  
4 Unit, University of Glasgow, for his advice regarding the conduct of multiple logistic regression  
5 analysis. We would also like to acknowledge the contribution of Dr Marie Löf and Dr Mark Daku to  
6 the design of this study.  
7  
8  
9  
10  
11  
12  
13  
14  
15  
16  
17  
18  
19  
20  
21  
22  
23  
24  
25  
26  
27  
28  
29  
30  
31  
32  
33  
34  
35  
36  
37  
38  
39  
40  
41  
42  
43  
44  
45  
46  
47  
48  
49  
50  
51  
52  
53  
54  
55  
56  
57  
58  
59  
60

For peer review only

## Introduction

Childhood obesity has been described as an international epidemic due to its high prevalence and rapid growth in numerous countries.<sup>1</sup> Globally, 13.4% of girls and 12.9% of boys in Low Income Countries, and 22.6% of girls, and 23.8% of boys in High Income Countries (classified by the World Bank) were classified as overweight or obese in 2013.<sup>2</sup> In England, one fifth of children in Reception year (age 4-5), and one third in Year 6 (age 10-11), were classified as overweight or obese in 2015/2016.<sup>3</sup> In Scotland, 28% of children aged 2-15 were classified as 'at risk of' overweight or obesity in 2015.<sup>4</sup> Childhood obesity has a broad range of short- and long-term health consequences,<sup>1</sup> tends to predict adolescent and adult obesity,<sup>5</sup> and is socioeconomically patterned.<sup>3</sup> For these reasons childhood obesity has been identified as a health priority for the UK and its devolved governments.<sup>6,7</sup>

Childhood obesity is a complex problem, with a complex set of drivers and potential solutions ranging from the individual to the environmental.<sup>8</sup> Ebbeling and colleagues<sup>1</sup> identify a wide range of causes, but argue that the problem "*can be primarily attributed to adverse environmental factors*", and identify a need for "*straightforward, if politically difficult*" solutions spanning homes, schools, the built environment, health care, marketing, media and politics. This multi-level package of solutions echoes Friedman's assertion that a 'full-court press' targeting 'every dimension of the problem' is necessary.<sup>9</sup> However, while academia and public health are united on the need to target the obesogenic environment, Swinburn and colleagues<sup>10</sup> state that "*governments have largely abdicated the responsibility for addressing obesity to individuals, the private sector, and non-governmental organisations*",<sup>10</sup> potentially due to anticipated or actual resistance, not just from corporations, but also electorates.<sup>9,11</sup> Indeed, public opinion research conducted in the US<sup>12</sup> and Germany<sup>13</sup> suggests that, while publics are in favour of tackling childhood obesity, they demonstrate less enthusiasm for regulative environmental interventions such as taxation. Hilbert characterises the German population

1  
2  
3 as “*ready for obesity prevention*”, but in need of education about the definition, prevalence and causes  
4  
5 of obesity.<sup>12</sup>  
6  
7

8  
9 The media represent a key influence on public perceptions of health issues and policies, setting the  
10  
11 public agenda by granting differing levels of prominence to different topics<sup>14</sup> and influencing how  
12  
13 those issues are understood by building frames (focuses of attention) that include constructions of  
14  
15 problems, affected groups, drivers and solutions.<sup>15 16</sup> The influence of framing is well established in  
16  
17 relation to obesity. Researchers have used experimental designs to demonstrate that ‘individualised’  
18  
19 representations of childhood obesity tend to lead participants to assign greater blame to individuals  
20  
21 and exhibit less support for environmental regulation,<sup>17</sup> and that different representations of the  
22  
23 consequences of childhood obesity can influence participants’ attitudes towards policies.<sup>18</sup> Similarly,  
24  
25 Barry and colleagues demonstrated that people’s perceptions of obesity (as communicated through  
26  
27 agreement with metaphor-based descriptions of obesity) predict their support for public policy  
28  
29 interventions, illustrating how, for example, framing obesity as being driven by industry manipulation  
30  
31 may lead to increased support for a ‘junk-food tax’.<sup>19</sup>  
32  
33  
34  
35

36  
37 The media are frequently accused of contributing to obesity, particularly childhood obesity, through  
38  
39 its associations with sedentary behaviour, advertising of unhealthy commodities, promotion of  
40  
41 unrealistic body image, and other mechanisms.<sup>20</sup> Many researchers have studied media  
42  
43 representations of obesity in general,<sup>21-33</sup> but relatively few have focused specifically on  
44  
45 representations of childhood obesity, and these have been primarily in the US and Australia. Barry and  
46  
47 colleagues<sup>34</sup> studied US print and television news framing of childhood obesity, observing that  
48  
49 coverage of the issue grew between 2000 and 2009, and that individual-level behavioural solutions to  
50  
51 obesity were dominant, particularly on television. Similarly, Hawkins and Linvill<sup>35</sup> studied US  
52  
53 newspaper framing of childhood obesity over three discrete time periods in 1991, 2001 and 2006, and  
54  
55 identified a predominant focus on individual-level factors (both individual children and their parents)  
56  
57 in representations of both causes and solutions.  
58  
59  
60



1  
2  
3 Bastian<sup>36</sup> analysed representations of childhood obesity in both Australian newspapers and academic  
4 literature in 2009, identifying predominantly individual framing within the media, compared to a  
5 social-structural framing in academic literature. Bastian<sup>36</sup> recommends that public health  
6 professionals work to redirect media attention towards structural drivers of childhood obesity. Maher  
7 and colleagues<sup>37</sup> analysed constructions of maternal responsibilities within Australian media coverage  
8 of childhood obesity, concluding that the dominant framing *“individualises maternal and child*  
9 *relationships rather than seeing mothering as embedded in broader social and economic structures”*,  
10 serving a neo-liberal agenda by diminishing the responsibility of wider society. This is consistent with  
11 the disproportionate focus on individual-level solutions identified by others.<sup>34-36 38</sup> While coverage of  
12 obesity in both adults and children appears to be characterised by individual-framing, it is notable that  
13 with adult obesity that individual responsibility is assigned to the person with obesity, while in  
14 childhood obesity that responsibility is predominantly assigned to parents, particularly mothers.<sup>39 40</sup>  
15 This distinction may complicate direct comparison between adult and child obesity, and the culturally-  
16 ingrained nature of the concept that parents (or mothers) are solely responsible for their children’s  
17 healthcare may represent a discursive obstacle to attempts to assign environmental solutions to  
18 childhood obesity.

19  
20  
21 In addition to traditional news media, researchers have analysed representations of childhood obesity  
22 in non-news media and new media. For example, Kalin and Fung’s<sup>38</sup> analysis of Spanish-language US  
23 parenting magazines’ representations of childhood obesity prevention and control echoes studies of  
24 news media representations of obesity, identifying greater focus on parental behaviour-change than  
25 system-level solutions, and limited recognition of social contextual factors. In recognition of the  
26 growing importance of user-generated social content and discussion, researchers have increasingly  
27 analysed content about childhood obesity on social media platforms.<sup>41 42</sup> While these new forms of  
28 media content represent an important aspect of the changing media landscape, traditional media  
29 outlets remain influential; despite the precipitous decline of UK print newspaper circulation,<sup>43</sup> the  
30 online presences of these hegemonic print news brands largely dominate online news readership,<sup>44</sup>

1  
2  
3 and typically define or legitimise news agendas for social media discussion.<sup>45 46</sup> As such, traditional  
4  
5 media remain a relevant subject for media analysis, particularly when studying how representations  
6  
7 evolve over timeframes predating the ascendancy of new media.  
8  
9

10  
11 The aim of this study is to further understandings of media representations of childhood obesity in  
12  
13 the UK context, using an approach informed by media framing theory,<sup>15 16</sup> analysing definitions of the  
14  
15 problem and constructions of drivers and solutions. This is important because, while childhood obesity  
16  
17 in the UK shares many similarities with that of other countries, the UK context differs in terms of  
18  
19 several elements including health service structure and media environment. The analysis will have  
20  
21 dual foci: the evolution of coverage between 1996 and 2014, and the relative salience of individual  
22  
23 and societal constructions of the drivers of, and potential solutions to, childhood obesity. To our  
24  
25 knowledge, this research will be the first empirical analysis of UK media framing of childhood obesity.  
26  
27 This paper comprises the UK portion of a multi-country research project, the other parts of which will  
28  
29 be reported in separate papers.  
30  
31  
32  
33

### 34 **Methods**

35  
36  
37 The media content analysis methods used were predominantly based on Hilton and colleagues' prior  
38  
39 study<sup>21</sup> of UK newspaper framing of obesity in the general population, adapted for this study's focus  
40  
41 on childhood obesity. This paper reports UK data that was part of a wider study that examined  
42  
43 childhood obesity media coverage in two other international contexts; Sweden and the United  
44  
45 States. Although content analysis is often viewed as an objective, descriptive approach, we subscribe  
46  
47 to Krippendorff's position that even the quantitative analysis of text is inherently an interpretive act,  
48  
49 and researchers should therefore acknowledge the individual bias that can arise from that process,  
50  
51 seeking to minimise that bias through research design, while also embracing how researchers'  
52  
53 contextual understandings can enrich coding and analysis beyond the crude 'objective' counting of  
54  
55 content.  
56  
57  
58  
59  
60

### *Patient and Public Involvement*

Due to the nature of this study, patients/public were not involved.

### *Sampling*

A set of six daily newspapers and five Sunday newspapers with high circulation figures<sup>47</sup> and representing a variety of political alignments and markets (or 'genres') were chosen. Table 1 lists these publications and indicates their political alignments and the markets that they occupy. Markets were defined as tabloid (typically sensationalist and politically diverse, with predominantly working-class readerships), middle-market tabloid (centre-right content with predominantly older, middle-class readerships) and quality (serious tone with predominantly middle-class readerships), using a typology used in prior studies of UK newspaper content<sup>21</sup>. Political alignment was determined by cross-referencing data on: the political party endorsed by each publication at the 2017 UK general election;<sup>48</sup> readers' perceptions of newspapers' political alignment;<sup>49</sup> and the voting behaviours of each publications' readers in the 2015 UK general election.<sup>50</sup> A sample period of 1996 to 2014 was chosen to encompass the time period covered in prior research,<sup>21</sup> in addition to a further four years of coverage that was extended to align with the time period covered by the other countries in our wider study (which will be described fully in a separate publication).

Identifying relevant articles from the chosen publications involved an initial database search, followed by manual filtering of search results. The Nexis database was searched for the presence of both the term 'obesity' OR 'obese' OR 'fat' and the term 'child' OR 'children' OR 'kid' OR 'kids' within the headlines of articles published within the selected newspapers. Each chosen publication was archived comprehensively within the Nexis database, with the exceptions of the Daily Telegraph and Sunday Telegraph prior to October 2000 and November 2000, respectively. As such, reporting from those publications during the first five years of the sample period was not represented. The initial search returned 1199 articles, which were subsequently subjected to manual application of exclusion criteria, including: less than 50% of article content focussing on childhood obesity (i.e.

1  
2  
3 where more than half the article discussed another topic with only brief mention of childhood  
4 obesity); being a reader's letter; or being part of television guide section. Following exclusion, the  
5  
6 final sample comprised 757 relevant articles.  
7  
8

### 9 10 *Coding*

11  
12 Article content was coded quantitatively using a coding frame adapted from one initially developed  
13  
14 by Hilton and colleagues.<sup>21</sup> The adapted coding frame was developed to record media frames of  
15  
16 childhood obesity in terms of definitions of the problem, mentions of specific biological, individual  
17  
18 and societal drivers, and biological, individual and societal solutions (itemised in Table 2). In addition,  
19  
20 the coding frame recorded whether the article was published on the front page of the publication,  
21  
22 and the length of the article in number of words. Articles were coded as relating to women/girls or  
23  
24 men/boys if members of that gender were described as being specifically problematic in relation to  
25  
26 childhood obesity (but not if rates for both genders were cited), or if the article profiled an individual  
27  
28 of a specific gender. Coding was performed by AN and CP, and 10% of articles were double-coded  
29  
30 blind to allow inter-rater agreement to be calculated. Cohen's kappa values for agreement on  
31  
32 individual codes are listed in Table 2. The threshold for acceptable agreement was set at 0.61  
33  
34 (defined by Landis and Koch as 'substantial' or better agreement),<sup>51</sup> and three codes were removed  
35  
36 due to insufficient agreement: dieting (such as fad diets) as a driver of childhood obesity;  
37  
38 normalisation of obesity as a driver of childhood obesity; and technological developments as a driver  
39  
40 of childhood obesity.  
41  
42  
43  
44  
45  
46

### 47 *Analysis*

48  
49 Statistical analysis was performed in STATA. Statistical procedures included: basic descriptive  
50  
51 statistics; Cohen's kappa test of inter-rater agreement; linear regression of relationships between  
52  
53 publication year and mentions of different categories of drivers and solutions; and multiple logistic  
54  
55 regression of relationships between political alignment and individual aspects of framing. The  
56  
57 multiple logistic regressions were adjusted by publication market because the markets represented  
58  
59  
60

1  
2  
3 were not distributed evenly by political alignment (as is the case in the UK newspaper industry), and  
4  
5 previous research has identified significant variation in health news coverage by publication  
6  
7 market.<sup>21 52 53</sup>  
8  
9

### 10 *Comparative analysis*

11  
12  
13 Data from Hilton and colleagues' previous study on representations of general (not childhood-  
14  
15 specific) obesity in the UK media were also analysed which had been collected and described fully  
16  
17 elsewhere<sup>21</sup> to enable comparison of newspaper representations of obesity in children with obesity  
18  
19 in adults, and obesity coverage more generally. This direct comparison was enabled by the  
20  
21 intentional similarity of the methods of data collection, coding and analysis in the two studies.  
22  
23  
24

## 25 **Results**

### 26 *Sample characteristics*

27  
28  
29 Table 1 summarises the political alignment and market of each publication in the sample, in addition  
30  
31 to the frequency of articles and front-page articles within those publications, and the variation in  
32  
33 word count within those articles. A total of 757 articles relevant to childhood obesity were identified  
34  
35 within the selected six publications (five of which were combined with their corresponding Sunday  
36  
37 counterparts). The frequency of coverage of childhood obesity varied between publications, ranging  
38  
39 from the *Independent & Independent on Sunday* publishing 61 relevant articles, none of which were  
40  
41 on front pages, to the *Mirror & Sunday Mirror*, which published 198 relevant articles, including two  
42  
43 front-page articles. The Daily Telegraph & Sunday Telegraph afforded the issue the greatest  
44  
45 prominence, featuring it on their front pages nine times.  
46  
47  
48  
49  
50  
51

### 52 **[Insert Table 1. Summary of article characteristics]**

53  
54  
55 The changing frequency of relevant articles within the sample between 1996 and 2014 are illustrated  
56  
57 in Figure 1, both overall and within each political alignment. The total number of relevant articles  
58  
59  
60

per year rose steadily from 2 in 1996 to a high of 82 in 2008, before declining to 40 in 2010, and finally rising again to 69 articles in 2014. The peak from 2006-08 was contemporaneous with the publication of the UK Government's Foresight project report on reducing obesity<sup>8</sup> and its corresponding mid-term and one-year reviews.

**[Insert Figure 1. Frequency of articles by year]**

*Definitions of the problem of childhood obesity*

Table 2 illustrates the frequencies of articles mentioning specific problem definitions, drivers and solutions related to childhood obesity, and Table 3 illustrates the extent to which publications' political alignment predicted mentions of specific definitions. More than half of articles quantified childhood obesity prevalence within the UK (n=413 54.6%), and a similar proportion described obesity prevalence as rising, or having risen (n=389, 51.4%). Centre-right-aligned publications mentioned increasing prevalence significantly less frequently than centre-left publications (OR:0.59; p=0.001). Eighty (10.6%) articles quantified the prevalence of obesity outside of the UK.

Approximately half of articles specifically described obesity as a health risk (n=397, 52.4%), and 102 (13.5%) described it as a burden to the National Health Service, and each of these themes were more frequent in centre-left publications (OR:0.35, p=0.010; OR:0.50, p=0.008). Childhood obesity was characterised as an economic burden to society in 74 (9.8%) articles, and significantly more so in centre-left publications (OR:0.35, p=0.010).

**[Insert Table 2. Frequency of mentions of problem definitions, drivers, and categories of solutions]**

**[Insert Table 3. Likelihood of centre-right-aligned publications mentioning definitions of obesity]**

Few articles (n=23, 3.0%) characterised obesity as a cosmetic problem. Twice as many articles mentioned childhood obesity in relation to women and/or girls (n=112, 14.8%) as men and/or boys (n=56, 7.4%), and men and/or boys were more likely to be mentioned in centre-left publications than centre-right publications, after adjusting for market (OR:0.43, p=0.020).

### *Presentations of potential drivers of, and solutions to, childhood obesity*

Mentions of specific drivers of childhood obesity were coded and categorised as either individual (n=453, 59.8%), societal (n=214, 28.3%) or biological/genetic (n=70, 9.2%) drivers (Table 2). Societal drivers were mentioned more frequently in centre-left publications (OR:0.69, p=0.046). Frequently-mentioned individual drivers included parenting (n=246, 32.5%), diet (n=235, 31.0%) and insufficient exercise (n=224, 29.6%), while societal drivers included an abundance of unhealthy food (n=129, 17.0%), marketing (n=90, 11.9%) and insufficient health services or facilities (n=53, 7.0%).

In addition to drivers, mentions of potential solutions to childhood obesity were coded into three corresponding categories: individual (n=276, 36.5%), societal (n=214, 28.3%) and biological (n=52, 6.9%) (Table 2). Table 4 illustrates the extent to which publications' political alignment predicted mentions of specific drivers and solutions. After adjusting for publication market, centre-left publications were more likely to mention societal drivers (OR:0.69, p=0.046) and societal solutions (OR:0.54, p=0.000). Regarding specific societal drivers, centre-left publications were more likely to mention marketing (OR:0.55, p=0.030) the an abundance of fast food (OR:0.61, p=0.011), but the latter was only significant before adjusting for publication market.

### **[Insert Table 4. Likelihood of centre-right-aligned publications mentioning categories of driver and solution]**

#### *Time trends in presentation of drivers and solutions*

Time trends in mentioning each category were analysed. Mentions of individual drivers (coefficient -0.068, p<0.001), individual solutions (coefficient -0.037, p=0.041), societal drivers (coefficient -0.097, p<0.001) and societal solutions (coefficient -0.044, p=0.012) each decreased significantly between 1996 and 2014. Neither biological/genetic drivers (coefficient -0.014, p=0.637) nor biological solutions (coefficient -0.020, p=0.558) varied significantly across the sample period.

1  
2  
3 Figure 2 illustrates the trends in individual and societal drivers and solutions. Individual drivers were  
4 mentioned particularly frequently (82-100%) between 1998 and 2000, before declining to between  
5 46% and 67% of articles between 2004 and 2014. Mentions of individual solutions peaked at 83% in  
6 2000, and subsequently declined, comprising 25-38% articles between 2007 and 2014. Mentions of  
7 societal drivers peaked at 67% in 2000, followed by a lower peak of 61% in 2002 and a subsequent  
8 lengthy decline to a low of 8% in 2012. Mentions of societal solutions exhibited a less linear decline  
9 than other categories, with peaks in 1998 (73%), 2004 (71%) and 2008 (66%), interspersed with  
10 declines. Notably, societal solutions were more commonly mentioned than individual solutions from  
11 2007-2014.  
12  
13  
14  
15  
16  
17  
18  
19  
20  
21  
22  
23  
24  
25  
26

27 **[Insert Figure 2. Trends in individual and societal drivers and solutions]**  
28  
29  
30  
31  
32

### 33 *Representations of childhood obesity in comparison to adult and general population obesity*

34  
35

36 The data collected for this study were compared with data collected in Hilton and colleagues' 2012  
37 study of newspaper representations of obesity in the general population.<sup>21</sup> Supporting information  
38 Figure S1 illustrates the yearly frequency of articles in each study's main sample, as well as a  
39 subsample of the previous study's data that excludes all articles that mentioned children. This  
40 represents a means of comparing representations of childhood obesity with representations of adult  
41 and non-age-specific obesity. Figure S1 suggests that childhood obesity received less newspaper  
42 coverage than adult obesity in every year covered by the two datasets, with the exception of 1999.  
43 The longer time period represented in the current study suggests that the decrease in publication  
44 frequency in 2008-2010 observed in the previous study<sup>21</sup> did not continue in subsequent years, at  
45 least on the topic childhood obesity.  
46  
47  
48  
49  
50  
51  
52  
53  
54  
55  
56  
57  
58  
59  
60



1  
2  
3 Supporting information Figure S2 illustrates the frequency of coverage of the two categories of  
4 driver and solution, individual and societal, within the present and prior sample.<sup>21</sup> Comparison of the  
5 data indicates that coverage of childhood obesity was characterised by greater focus on individual  
6 drivers and societal solutions than coverage of adult obesity, while coverage of societal drivers and  
7 individual solutions was relatively similar.  
8  
9  
10  
11  
12  
13  
14  
15  
16  
17

## 18 Discussion

19  
20  
21 By systematically analysing the content of 757 articles, we arrived at several key findings related to  
22 UK national newspapers' representations of childhood obesity. Coverage of the issue grew steadily  
23 from two articles in 1996 to a high of 82 articles in 2008, after which article frequency declined to 45  
24 in 2009, before rising to a second peak of 69 in 2014. Childhood obesity was predominantly  
25 characterised as driven by individual-level factors, particularly parenting, dietary behaviours and  
26 inactivity, though societal drivers such as marketing were also identified. Similarly, there was greater  
27 focus on individual-level solutions than societal-level solutions. Societal constructions of the drivers  
28 of, and solutions to, obesity, were significantly more frequent within centre-left publications than  
29 centre-right. Analysis of time trends provided evidence of a small shift towards societal  
30 conceptualisations, with mentions of social solutions outnumbering individual solutions throughout  
31 the latter half of the sample period. Childhood obesity was frequently defined as a health risk in  
32 approximately half of articles, and was associated with females substantially more frequently than  
33 males, but more nuanced coding of gender-representation in these articles is required.  
34  
35  
36  
37  
38  
39  
40  
41  
42  
43  
44  
45  
46  
47  
48  
49

50  
51 Centre-left publications' greater focus on societal constructions of the causes of, and solutions to  
52 childhood obesity, and on the societal and health service burdens of childhood obesity, are in line  
53 with the communal and individual framings associated with left- and right-wing political ideologies.  
54  
55  
56  
57 Entman describes the core process of building frames as "*[selecting] some aspects of a perceived*  
58  
59  
60

1  
2  
3 *reality and [making] them more salient*<sup>16</sup>, and this process is evident in UK newspaper  
4  
5 representations of childhood obesity, with centre-left publications building frames that incorporate  
6  
7 societal aspects of the childhood obesity problem, while centre-right publications omit them.  
8  
9

10  
11 This research comprised a systematic analysis of a large sample of nineteen years of UK national  
12  
13 newspaper coverage, facilitating statistical understandings of media frames of childhood obesity,  
14  
15 including definitions, drivers and solutions. However, the research is subject to some limitations. The  
16  
17 *Nexis* database does not archive articles from the Daily Telegraph and Sunday Telegraph prior to  
18  
19 October 2000 and November 2000, respectively. However, the low frequency of reporting on  
20  
21 childhood obesity prior to 2000 in the other sources in the sample during those years suggests that  
22  
23 the absence of those two sources is unlikely to have had a relevant impact on our analysis. The  
24  
25 method allowed quantitative analysis of a media frames across a large sample, but not the nuanced  
26  
27 analysis of specific aspects of framing that qualitative analysis would permit.  
28  
29

30  
31 The coding frame was extensive, but subject to certain limitations. Coding did not record the types  
32  
33 of issues discussed by each articles, which may have been valuable given the variety of different  
34  
35 perspectives from which the issue may be viewed. Further, while mentions of males and females in  
36  
37 relation to obesity in children were coded, coding did not differentiate between mentions of boys  
38  
39 with obesity, girls with obesity, male parents and female parents. Given the frequently gendered  
40  
41 nature of societal discourse about obesity, future research may benefit from analysing gendered  
42  
43 representations of both children and parents within news coverage of childhood obesity.  
44  
45

46  
47 Additionally, future research may benefit from widening the search scope from childhood obesity to  
48  
49 also cover childhood overweight. Our search terms were used to replicate those in a previous study  
50  
51 (ref to Swedish paper) as therefore do not include the term 'childhood', which could lead to some  
52  
53 relevant articles being missed. However, test searches suggest that incorporating the term  
54  
55 'childhood' into the search string returns negligible additional articles from UK national newspapers,  
56  
57 so it is unlikely that those absent articles would have substantially affected the analysis. Further  
58  
59  
60

1  
2  
3 limitations of the research stem from decisions made about the type of content analysed. The sole  
4 focus on article text was at the cost of analysing images, which have been found to be an important  
5 aspect of media representations of obesity.<sup>23 31 54 55</sup> Further, the focus on newspaper content was at  
6 the expense of data from other news sources, such as television and online news, or alternative  
7 sources, such as reader comments or social media posts. We argue that our focus on the evolution  
8 of the debate over time is not well suited to the rapidly-changing online news environment, but  
9 acknowledge that incorporating other types of source could be valuable, as representations of  
10 childhood obesity have been found to vary by medium in the US.<sup>34</sup> Finally, while links between  
11 media representations and public perceptions are well established, content analysis can only  
12 describe content, not determine how that content is received by audiences.  
13  
14  
15  
16  
17  
18  
19  
20  
21  
22  
23  
24  
25

26 This research built upon prior research examining media framing of general obesity<sup>21</sup> by extending  
27 the time period covered, taking a sole focus on childhood obesity, and comparing coverage of  
28 childhood obesity to that of obesity in general. As would be expected, the growth in coverage of  
29 childhood obesity from 1996 to 2008 identified in our prior research<sup>21</sup> was replicated in the present  
30 research, but it was found that the rise did not continue beyond 2008, although it remained at an  
31 elevated level of coverage relative to pre-2002. Further research might investigate whether the  
32 increase in article frequency in the final year of the study period is indicative of a prolonged rise in  
33 coverage beyond 2014. Although it is likely that coverage of childhood obesity in 2007-8 was  
34 elevated due to dissemination of, and activities related to, the UK Government's Foresight report  
35 *Reducing obesity: future choices*, published in October 2007,<sup>8</sup> this trend mirrors that found in Barry  
36 and colleagues'<sup>34</sup> content analysis of US television and print news coverage of childhood obesity  
37 suggesting that, despite locally-relevant policy events, trends in coverage of childhood obesity may  
38 follow transnational patterns. Barry and colleagues<sup>34</sup> suggest that the decline in coverage may be an  
39 example of Downs'<sup>56</sup> "issue attention cycle", in which public attention to a specific issue will  
40 inevitably decline regardless of whether that issue reaches any conclusion. However, one area  
41 where our findings depart from those of Barry and colleagues<sup>34</sup> is in individual and structural causes  
42  
43  
44  
45  
46  
47  
48  
49  
50  
51  
52  
53  
54  
55  
56  
57  
58  
59  
60

1  
2  
3 of childhood obesity, which they found to be equally frequent within the newspaper articles in the  
4  
5 their sample.  
6  
7

8 Both the original study by Hilton and colleagues and the present study present some evidence of a  
9  
10 shift away from a focus on individual constructions of drivers and solutions across their respective  
11  
12 time periods. However, comparison of the two pieces of research suggests that, in comparison to  
13  
14 general obesity, media frames of childhood obesity have a greater tendency to attribute  
15  
16 responsibility to individuals. The disproportionate individual-level framing of childhood obesity  
17  
18 might be explained by the presence of parents as mediators between children and public policy.  
19  
20 While children are vulnerable to societal and environmental pressures, and are often publicly viewed  
21  
22 as deserving of legislative protection,<sup>57-59</sup> public discourse around childhood obesity may attribute  
23  
24 greater individual responsibility to parents.<sup>60</sup> Hawkins and Linvill found that US news frequently  
25  
26 identifies parents as both responsible for, and responsible for addressing, children's obesity, and  
27  
28 conclude that this framing represents an obstacle to stimulating demand for a public policy response  
29  
30 to the problem.<sup>35</sup> Boero's qualitative analysis of US media representations of childhood obesity  
31  
32 identifies parents, and particularly mothers, as being 'under fire' for failing to foster healthy  
33  
34 behaviours in their children.<sup>28</sup> Unlike in debates around unhealthy phenomena such as exposure to  
35  
36 second-hand smoke, in which an adult lifestyle product may be perceived as unfairly invading  
37  
38 children's spaces, feeding children occupies a complex position of being nurturing and essential,  
39  
40 while also being a potential source of long-term health harms.<sup>60</sup>  
41  
42  
43  
44  
45  
46

47 For media content to drive public appetite for policy solutions to childhood obesity, media must  
48  
49 both raise perceptions of the issue, through heightened coverage, and frame the issue as one  
50  
51 demanding societal-level, rather than solely individual-level, solutions. Our research demonstrates  
52  
53 that, while the salience of childhood obesity in UK national newspapers rose steadily from 1996-  
54  
55 2008, that level of attention was not maintained subsequent to 2008, although there is reason to  
56  
57 suggest that this may change in 2017/18 with media coverage of the incoming levy on sugar-  
58  
59  
60

1  
2  
3 sweetened beverages in the UK.<sup>61</sup> While this faltering frequency of reporting may be undesirable for  
4 raising public consciousness, our analysis suggests that the frames constructed within those later  
5 years were characterised by a predominance of social solutions over individual solutions, which, if  
6 internalised by audiences, may stimulate public appetites for engaging the problem at the public  
7 policy level. Notably, this shift from individual to social framing occurred despite the well-  
8 documented complications caused by parents' roles as mediators between public policy and  
9 children's health behaviours. Taking these key findings into account, this study supports a mixed  
10 view of UK media framing of childhood obesity, in which positive changes in framing may be  
11 undermined by a decrease in salience. Those advocating for public policy responses to childhood  
12 obesity may seek to raise the issue's media profile, while continuing to promote social framings.  
13  
14  
15  
16  
17  
18  
19  
20  
21  
22  
23  
24  
25  
26  
27  
28  
29  
30  
31  
32  
33  
34

### 35 **Author Statement**

36  
37  
38 SH, CP and AN: study planning and conceptualisation; AN and CP: data coding; AN and CP: data  
39 analysis; AN and CP: drafting manuscript; SH: critical review of the manuscript.  
40  
41  
42  
43

### 44 **Data Statement**

45  
46  
47 Data were accessed from the Nexis newspaper database at <https://www.nexis.com>  
48  
49  
50  
51  
52  
53  
54  
55  
56  
57  
58  
59  
60

## TABLES:

Table 1. Summary of article characteristics

| Publication                         | Political alignment | Market        | All articles |              | Front-page articles |            | Word count   |            |              |
|-------------------------------------|---------------------|---------------|--------------|--------------|---------------------|------------|--------------|------------|--------------|
|                                     |                     |               | n            | %*           | n                   | %**        | 1st quartile | Median     | 3rd quartile |
| Guardian & Observer                 | Centre-left         | Quality       | 109          | 14.4         | 5                   | 4.6        | 457          | 680        | 907          |
| Independent & Independent on Sunday | Centre-left         | Quality       | 61           | 8.1          | 0                   | -          | 247          | 474        | 690          |
| Mirror & Sunday Mirror Daily        | Centre-left         | Tabloid       | 198          | 26.2         | 2                   | 1.0        | 121          | 219        | 459          |
| Telegraph & Sunday Telegraph        | Centre-right        | Quality       | 107          | 14.1         | 9                   | 8.4        | 182          | 346        | 502          |
| Daily Mail & Mail on Sunday         | Centre-right        | Middle-market | 134          | 17.7         | 6                   | 4.5        | 263          | 438        | 672          |
| Sun                                 | Centre-right        | Tabloid       | 148          | 19.6         | 0                   | -          | 98           | 195        | 337          |
| <b>Total</b>                        |                     |               | <b>757</b>   | <b>100.0</b> | <b>22</b>           | <b>2.9</b> | <b>151</b>   | <b>325</b> | <b>595</b>   |

\*percentage within whole sample

\*\*percentage of front-page articles within publication

Table 2. Frequency of mentions of problem definitions, drivers, and categories of solutions

| Theme                                                | Total (n=757) |      | Inter-rater agreement* |
|------------------------------------------------------|---------------|------|------------------------|
|                                                      | n             | %    |                        |
| <b>Problem definitions</b>                           |               |      |                        |
| Quantifies obesity prevalence within the UK          | 413           | 54.6 | 0.834                  |
| Quantifies obesity prevalence elsewhere              | 80            | 10.6 | 0.814                  |
| Mentions increase in obesity rates                   | 389           | 51.4 | 0.940                  |
| Mentions obesity as a risk to health                 | 397           | 52.4 | 0.893                  |
| Mentions obesity as a cosmetic problem               | 23            | 3.0  | 0.850                  |
| Mentions obesity as a burden to NHS                  | 102           | 13.5 | 0.814                  |
| Mentions obesity as an economic burden to society    | 32            | 4.2  | 0.630                  |
| Mentions socio-economic and geographical differences | 74            | 9.8  | 0.706                  |
| Mentions women and/or girls                          | 112           | 14.8 | 0.706                  |
| Mentions men and/or boys                             | 56            | 7.4  | 0.706                  |
| Obesity is not a problem, over-hyped etc.            | 93            | 12.3 | 0.850                  |
| Mentions discrimination, bullying or stigmatisation  | 70            | 9.2  | 1.000                  |
| <b>Drivers of obesity</b>                            |               |      |                        |
| <i>Overall drivers</i>                               |               |      |                        |
| Any drivers mentioned                                | 522           | 69.0 | n/a**                  |
| Any biological/genetic driver mentioned              | 70            | 9.2  | n/a**                  |
| Any individual driver mentioned                      | 453           | 59.8 | n/a**                  |
| Any societal driver mentioned                        | 214           | 28.3 | n/a**                  |
| <i>Individual drivers</i>                            |               |      |                        |
| Mentions poor diet, overeating                       | 235           | 31.0 | 0.857                  |
| Mentions poor self-control, willpower or choices     | 60            | 7.9  | 0.680                  |
| Mentions insufficient exercise, sedentary lifestyle  | 224           | 29.6 | 0.919                  |
| Mentions parenting shortcomings                      | 246           | 32.5 | 0.939                  |
| <i>Societal drivers</i>                              |               |      |                        |
| Mentions an abundance of processed/fast food         | 129           | 17.0 | 0.752                  |
| Mentions a lack of health services or facilities     | 53            | 7.0  | 0.945                  |
| Mentions food/drink advertising and promotions       | 90            | 11.9 | 1.000                  |
| <b>Solutions to obesity</b>                          |               |      |                        |
| Any solution mentioned                               | 538           | 71.1 | n/a**                  |
| Individual solution mentioned                        | 276           | 36.5 | 0.920                  |
| Societal solution mentioned                          | 214           | 28.3 | 0.839                  |
| Biological solution mentioned                        | 52            | 6.9  | 1.000                  |

\*Cohen's kappa test of inter-rater agreement.

\*\*Agreement was not calculated for these variables as they were computed from other, manually-coded variables

Table 3. Likelihood of centre-right-aligned publications mentioning definitions of obesity

|                                                             | Unadjusted |           |              | Adjusted* |           |              |
|-------------------------------------------------------------|------------|-----------|--------------|-----------|-----------|--------------|
|                                                             | OR         | 95% CI    | P-value      | OR        | 95% CI    | P-value      |
| <b>Problem definitions</b>                                  |            |           |              |           |           |              |
| <i>Quantifies obesity prevalence within the UK</i>          | 0.97       | 0.73-1.30 | 0.858        | 0.92      | 0.67-1.27 | 0.608        |
| <i>Quantifies obesity prevalence elsewhere</i>              | 0.63       | 0.40-1.01 | 0.057        | 0.59      | 0.34-1.03 | 0.065        |
| <i>Mentions increase in obesity rates</i>                   | 0.70       | 0.52-0.93 | <b>0.014</b> | 0.59      | 0.42-0.81 | <b>0.001</b> |
| <i>Mentions obesity as a risk to health</i>                 | 1.02       | 0.77-1.36 | 0.885        | 0.88      | 0.64-1.22 | 0.456        |
| <i>Mentions obesity as a cosmetic problem</i>               | 0.40       | 0.16-0.99 | <b>0.048</b> | 0.35      | 0.11-1.05 | 0.061        |
| <i>Mentions obesity as a burden to NHS</i>                  | 0.57       | 0.37-0.87 | <b>0.009</b> | 0.50      | 0.30-0.83 | <b>0.008</b> |
| <i>Mentions obesity as an economic burden to society</i>    | 0.36       | 0.19-0.70 | <b>0.003</b> | 0.35      | 0.16-0.78 | <b>0.010</b> |
| <i>Mentions socio-economic and geographical differences</i> | 0.62       | 0.38-1.00 | 0.051        | 0.85      | 0.51-1.43 | 0.547        |
| <i>Mentions women and/or girls</i>                          | 0.86       | 0.58-1.29 | 0.467        | 0.77      | 0.48-1.23 | 0.271        |
| <i>Mentions men and/or boys</i>                             | 0.59       | 0.34-1.03 | 0.062        | 0.43      | 0.22-0.88 | <b>0.020</b> |
| <i>Obesity is not a problem, over-hyped etc.</i>            | 0.75       | 0.29-1.93 | 0.552        | 0.73      | 0.25-2.15 | 0.565        |
| <i>Mentions discrimination, bullying or stigmatisation</i>  | 0.56       | 0.36-0.87 | <b>0.010</b> | 0.44      | 0.25-0.76 | <b>0.003</b> |

\*Adjusted for publication market



Table 4. Likelihood of centre-right-aligned publications mentioning categories of driver and solution

|                                                            | Unadjusted |           |              | Adjusted* |           |              |
|------------------------------------------------------------|------------|-----------|--------------|-----------|-----------|--------------|
|                                                            | OR         | 95% CI    | P-value      | OR        | 95% CI    | P-value      |
| <b>Drivers of obesity</b>                                  |            |           |              |           |           |              |
| Overall drivers                                            |            |           |              |           |           |              |
| <i>Any drivers mentioned</i>                               | 0.90       | 0.66-1.23 | 0.505        | 0.78      | 0.56-1.10 | 0.162        |
| <i>Any biological/genetic driver mentioned</i>             | 0.73       | 0.45-1.20 | 0.214        | 0.85      | 0.49-1.46 | 0.557        |
| <i>Any individual driver mentioned</i>                     | 1.00       | 0.75-1.34 | 0.974        | 0.84      | 0.61-1.16 | 0.292        |
| <i>Any societal driver mentioned</i>                       | 0.62       | 0.45-0.86 | <b>0.004</b> | 0.69      | 0.48-0.99 | <b>0.046</b> |
| Individual drivers                                         |            |           |              |           |           |              |
| <i>Mentions poor diet, overeating</i>                      | 0.73       | 0.54-0.99 | <b>0.045</b> | 0.65      | 0.46-0.93 | <b>0.018</b> |
| <i>Mentions poor self-control, willpower or choices</i>    | 0.61       | 0.35-1.04 | 0.068        | 0.71      | 0.39-1.28 | 0.255        |
| <i>Mentions insufficient exercise, sedentary lifestyle</i> | 0.75       | 0.55-1.03 | 0.077        | 0.67      | 0.47-0.97 | <b>0.032</b> |
| <i>Mentions parenting shortcomings</i>                     | 1.14       | 0.84-1.55 | 0.386        | 1.08      | 0.77-1.52 | 0.660        |
| Societal drivers                                           |            |           |              |           |           |              |
| <i>Mentions an abundance of processed/fast food</i>        | 0.61       | 0.41-0.89 | <b>0.011</b> | 0.73      | 0.48-1.12 | 0.153        |
| <i>Mentions a lack of health services or facilities</i>    | 0.90       | 0.52-1.58 | 0.725        | 0.87      | 0.46-1.65 | 0.671        |
| <i>Mentions food/drink advertising and promotions</i>      | 0.56       | 0.36-0.88 | <b>0.012</b> | 0.55      | 0.32-0.94 | <b>0.030</b> |
| <b>Solutions to obesity</b>                                |            |           |              |           |           |              |
| <i>Biological</i>                                          |            |           |              |           |           |              |
|                                                            | 0.73       | 0.42-1.29 | 0.286        | 0.54      | 0.26-1.09 | 0.087        |
| <i>Individual</i>                                          |            |           |              |           |           |              |
|                                                            | 0.90       | 0.67-1.20 | 0.464        | 0.90      | 0.64-1.25 | 0.527        |
| <i>Societal</i>                                            |            |           |              |           |           |              |
|                                                            | 0.62       | 0.46-0.83 | <b>0.001</b> | 0.54      | 0.39-0.75 | <b>0.000</b> |

\*Adjusted for publication market

1  
2  
3  
4  
5  
6  
7  
8  
9  
10  
11  
12  
13  
14  
15  
16  
17  
18  
19  
20  
21  
22  
23  
24  
25  
26  
27  
28  
29  
30  
31  
32  
33  
34  
35  
36  
37  
38  
39  
40  
41  
42  
43  
44  
45  
46  
47  
48  
49  
50  
51  
52  
53  
54  
55  
56  
57  
58  
59  
60

For peer review only

## References

1. Ebbeling CB, Pawlak DB, Ludwig DS. Childhood obesity: public-health crisis, common sense cure. *Lancet* 2002;**360**(9331):473-82
2. Ng M, Fleming T, Robinson M, et al. Global, regional, and national prevalence of overweight and obesity in children and adults during 1980–2013: a systematic analysis for the Global Burden of Disease Study 2013. *Lancet* 2014;**384**(9945):766-81
3. NHS Digital. Statistics on Obesity, Physical Activity and Diet, 2017.
4. Scottish Government. The Scottish Health Survey: 2015 edition. Edinburgh: Scottish Government, 2015.
5. Simmonds M, Llewellyn A, Owen CG, et al. Predicting adult obesity from childhood obesity: a systematic review and meta-analysis. *Obesity Reviews* 2016;**17**(2):95-107 doi: 10.1111/obr.12334[published Online First: Epub Date] | .
6. HM Government. Childhood obesity: a plan for action, 2017.
7. Scottish Government. Increase the proportion of healthy weight children. Secondary Increase the proportion of healthy weight children 2016. <http://www.gov.scot/About/Performance/scotPerforms/indicator/healthyweight>.
8. Butland B, Jebb S, Kopelman P, et al. Foresight. Tackling Obesities: Future Choices - Project report. 2nd ed. London: Government Office for Science, 2007.
9. Friedman DA. Public health regulation and the limits of paternalism. *Conn L Rev* 2013;**46**:1687
10. Swinburn BA, Sacks G, Hall KD, et al. The global obesity pandemic: shaped by global drivers and local environments. *Lancet* 2011;**378**(9793):804-14
11. Swinburn BA. Obesity prevention: the role of policies, laws and regulations. *Australia and New Zealand health policy* 2008;**5**(1):12
12. Hilbert A, Rief W, Braehler E. What determines public support of obesity prevention? *J Epidemiol Community Health* 2007;**61**(7):585
13. Evans WD, Finkelstein EA, Kamerow DB, et al. Public perceptions of childhood obesity. *Am J Prev Med* 2005;**28**(1):26-32 doi: <http://dx.doi.org/10.1016/j.amepre.2004.09.008>[published Online First: Epub Date] | .
14. McCombs ME, Shaw DL. The agenda-setting function of mass media. *Public Opin Q* 1972;**36**(2):176-87
15. Scheufele DA, Tewksbury D. Framing, agenda setting, and priming: The evolution of three media effects models. *J Commun* 2007;**57**(1):9-20
16. Entman RM. Framing: Toward clarification of a fractured paradigm. *J Commun* 1993;**43**(4):51-58
17. Barry CL, Brescoll VL, Gollust SE. Framing Childhood Obesity: How Individualizing the Problem Affects Public Support for Prevention. *Polit Psychol* 2013:n/a-n/a doi: 10.1111/pops.12018[published Online First: Epub Date] | .
18. Gollust SE, Niederdeppe J, Barry CL. Framing the Consequences of Childhood Obesity to Increase Public Support for Obesity Prevention Policy. *Am J Public Health* 2013;**103**(11):e96-e102 doi: 10.2105/ajph.2013.301271[published Online First: Epub Date] | .
19. Barry CL, Brescoll VL, Brownell KD, et al. Obesity Metaphors: How Beliefs about the Causes of Obesity Affect Support for Public Policy. *Milbank Q* 2009;**87**(1):7-47 doi: 10.1111/j.1468-0009.2009.00546.x[published Online First: Epub Date] | .
20. Boyce T. The media and obesity. *Obesity Reviews* 2007;**8**:201-05 doi: 10.1111/j.1467-789X.2007.00342.x[published Online First: Epub Date] | .
21. Hilton S, Patterson C, Teyhan A. Escalating coverage of obesity in UK newspapers: the evolution and framing of the “obesity epidemic” from 1996 to 2010. *Obes* 2012;**20**(8):1688-95
22. Hilbert A, Ried J. Obesity in Print: An Analysis of Daily Newspapers. *Obesity Facts* 2009;**2**(1):46-51
23. Patterson C, Hilton S. Normalisation and Stigmatisation of Obesity in UK Newspapers: a Visual Content Analysis. *The Open Obesity Journal* 2013;**5**:82-91 doi: 10.2174/1876823720131001011[published Online First: Epub Date] | .

24. Flint SW, Hudson J, Lavalley D. The portrayal of obesity in UK national newspapers. *Stigma and Health* 2016;**1**(1):16
25. Islam S, Fitzgerald L. Indigenous obesity in the news: a media analysis of news representation of obesity in Australia's Indigenous population. *BMC obesity* 2016;**3**(1):30
26. Atanasova D. Obesity frames in British and German online newspapers, 2009-2011. Department of Media and Communication, 2015.
27. Bonfiglioli C. Overweight and Obesity in TV News. *Values and Choices in Television Discourse: Springer*, 2015:87-108.
28. Boero N. All the news that's fat to print: the American "obesity epidemic" and the media. *Qualitative Sociology* 2007;**30**(1):41-60
29. Lawrence RG. Framing obesity: The evolution of news discourse on a public health issue. *Harvard International Journal of Press/Politics* 2004;**9**(3):56-75 doi: citeulike-article-id:4228152[published Online First: Epub Date]].
30. Kim S-H, Willis LA. Talking about Obesity: News Framing of Who Is Responsible for Causing and Fixing the Problem. *Journal of Health Communication* 2007;**12**(4):359-76 doi: 10.1080/10810730701326051[published Online First: Epub Date]].
31. Gollust SE, Eboh I, Barry CL. Picturing obesity: Analyzing the social epidemiology of obesity conveyed through US news media images. *Soc Sci Med* 2012;**74**(10):1544-51
32. Jeong M, Gilmore JS, Bleakley A, et al. Local news media framing of obesity in the context of a sugar-sweetened beverage reduction media campaign. *Journal of nutrition education and behavior* 2014;**46**(6):583-88
33. Varava K. Visual framing, stigmatization, race, and obesity: Examining television news presentation of stories about obesity and stories about health. *Communication Studies* 2016;**67**(5):509-29
34. Barry CL, Jarlenski M, Grob R, et al. News media framing of childhood obesity in the United States from 2000 to 2009. *Pediatrics* 2011;**128**(1):132-45 doi: peds.2010-3924 [pii] 10.1542/peds.2010-3924[published Online First: Epub Date]].
35. Hawkins KW, Linvill DL. Public health framing of news regarding childhood obesity in the United States. *Health communication* 2010;**25**(8):709-17
36. Bastian A. Representations of childhood obesity in Australian newsprint media and academic literature. *Aust N Z J Public Health* 2011;**35**(2):135-39
37. Maher J, Fraser S, Wright J. Framing the mother: childhood obesity, maternal responsibility and care. *J Gend Stud* 2010;**19**(3):233-47
38. Kalin SR, Fung TT. Comparison of child obesity prevention and control content in mainstream and Spanish-language US parenting magazines. *Journal of the Academy of Nutrition and Dietetics* 2013;**113**(1):133-40
39. Boero N. Obesity in the media: Social science weighs in. *Critical Public Health* 2013;**23**(3):371-80
40. Douglas F, Clark J, Craig L, et al. "It's a balance of just getting things right": mothers' views about pre-school childhood obesity and obesity prevention in Scotland. *BMC public health* 2014;**14**(1):1009
41. Harris JK, Moreland-Russell S, Tabak RG, et al. Communication About Childhood Obesity on Twitter. *Am J Public Health* 2014;**104**(7):e62-e69 doi: 10.2105/ajph.2013.301860[published Online First: Epub Date]].
42. So J, Prestin A, Lee L, et al. What Do People Like to "Share" About Obesity? A Content Analysis of Frequent Retweets About Obesity on Twitter. *Health Communication* 2016;**31**(2):193-206 doi: 10.1080/10410236.2014.940675[published Online First: Epub Date]].
43. Tobitt C. National newspaper ABCs: Industry-wide circulation decline continues as Metro and Sun top the table. Secondary National newspaper ABCs: Industry-wide circulation decline continues as Metro and Sun top the table 2018. <https://www.pressgazette.co.uk/national-newspaper-abcs-industry-wide-circulation-decline-continues-as-metro-and-sun-top-the-table/>.

- 1
- 2
- 3
- 4 44. Tobitt C. The Sun overtakes Mail Online to become UK's biggest online newsbrand, latest
- 5 Comscore data shows. Secondary The Sun overtakes Mail Online to become UK's biggest
- 6 online newsbrand, latest Comscore data shows 2018. [https://www.pressgazette.co.uk/the-](https://www.pressgazette.co.uk/the-sun-overtakes-mail-online-to-become-uks-biggest-online-newspaper-brand-latest-comscore-data-shows/)
- 7 [sun-overtakes-mail-online-to-become-uks-biggest-online-newspaper-brand-latest-comscore-](https://www.pressgazette.co.uk/the-sun-overtakes-mail-online-to-become-uks-biggest-online-newspaper-brand-latest-comscore-data-shows/)
- 8 [data-shows/](https://www.pressgazette.co.uk/the-sun-overtakes-mail-online-to-become-uks-biggest-online-newspaper-brand-latest-comscore-data-shows/).
- 9 45. McCombs M. *Setting the agenda: Mass media and public opinion*: John Wiley & Sons, 2018.
- 10 46. Harder RA, Sevenans J, Van Aelst P. Intermedia agenda setting in the social media age: How
- 11 traditional players dominate the news agenda in election times. *The International Journal of*
- 12 *Press/Politics* 2017;**22**(3):275-93
- 13 47. Press Gazette. National newspaper print ABCs for Jan 2017: Times and Observer both boost print
- 14 sales year on year. Secondary National newspaper print ABCs for Jan 2017: Times and
- 15 Observer both boost print sales year on year 2017.
- 16 [http://www.pressgazette.co.uk/national-newspaper-print-abcs-for-jan-2017-observer-up-](http://www.pressgazette.co.uk/national-newspaper-print-abcs-for-jan-2017-observer-up-year-on-year-the-sun-is-fastest-riser-month-on-month/)
- 17 [year-on-year-the-sun-is-fastest-riser-month-on-month/](http://www.pressgazette.co.uk/national-newspaper-print-abcs-for-jan-2017-observer-up-year-on-year-the-sun-is-fastest-riser-month-on-month/).
- 18 48. Ponsford D. Daily Mail and Sun launch front-page attacks on Corbyn as Fleet Street lines up
- 19 behind Theresa May. Secondary Daily Mail and Sun launch front-page attacks on Corbyn as
- 20 Fleet Street lines up behind Theresa May 2017. [https://www.pressgazette.co.uk/daily-mail-](https://www.pressgazette.co.uk/daily-mail-and-sun-launch-front-page-attacks-on-corbyn-as-fleet-street-lines-up-behind-theresa-may/)
- 21 [and-sun-launch-front-page-attacks-on-corbyn-as-fleet-street-lines-up-behind-theresa-may/](https://www.pressgazette.co.uk/daily-mail-and-sun-launch-front-page-attacks-on-corbyn-as-fleet-street-lines-up-behind-theresa-may/).
- 22 49. Smith M. How left or right-wing are the UK's newspapers? Secondary How left or right-wing are
- 23 the UK's newspapers? 2017. [https://yougov.co.uk/news/2017/03/07/how-left-or-right-](https://yougov.co.uk/news/2017/03/07/how-left-or-right-wing-are-uks-newspapers/)
- 24 [wing-are-uks-newspapers/](https://yougov.co.uk/news/2017/03/07/how-left-or-right-wing-are-uks-newspapers/).
- 25 50. Kellner P. General election 2015: how Britain really voted. Secondary General election 2015: how
- 26 Britain really voted 2015. [https://yougov.co.uk/topics/politics/articles-](https://yougov.co.uk/topics/politics/articles-reports/2015/06/08/general-election-2015-how-britain-really-voted)
- 27 [reports/2015/06/08/general-election-2015-how-britain-really-voted](https://yougov.co.uk/topics/politics/articles-reports/2015/06/08/general-election-2015-how-britain-really-voted).
- 28 51. Landis JR, Koch GG. The measurement of observer agreement for categorical data *Biometrics*
- 29 1977;**33**(1):159-74
- 30 52. Patterson C, Semple S, Wood K, et al. A quantitative content analysis of UK newsprint coverage
- 31 of proposed legislation to prohibit smoking in private vehicles carrying children. *BMC Public*
- 32 *Health* 2015;**15**:760
- 33 53. Patterson C, Katikireddi SV, Wood K, et al. Representations of minimum unit pricing for alcohol in
- 34 UK newspapers: a case study of a public health policy debate. *J Public Health* 2014;**37**(1):40-
- 35 49
- 36 54. Heuer CA, McClure KJ, Puhl RM. Obesity stigma in online news: A visual content analysis. *Journal*
- 37 *of Health Communication* 2011;**16**(9):976-87
- 38 55. McClure KJ, Puhl RM, Heuer CA. Obesity in the news: Do photographic images of obese persons
- 39 influence antifat attitudes? *Journal of health communication* 2011;**16**(4):359-71
- 40 56. Downs A. Up and down with ecology: the "issue-attention cycle". *The public* 1972
- 41 57. Schneider A, Ingram H. Social construction of target populations: Implications for politics and
- 42 policy. *Am Polit Sci Rev* 1993:334-47
- 43 58. Freeman B, Chapman S, Storey P. Banning smoking in cars carrying children: an analytical history
- 44 of a public health advocacy campaign. *Aust N Z J Public Health* 2008;**32**(1):60-65
- 45 59. Hilton S, Wood K, Bain J, et al. Newsprint coverage of smoking in cars carrying children: a case
- 46 study of public and scientific opinion driving the policy debate. *BMC Public Health*
- 47 2014;**14**(1):1116
- 48 60. Schwartz MB, Puhl R. Childhood obesity: a societal problem to solve. *Obesity reviews*
- 49 2003;**4**(1):57-71
- 50 61. Buckton CH, Patterson C, Hyseni L, et al. The palatability of sugar-sweetened beverage taxation:
- 51 A content analysis of newspaper coverage of the UK sugar debate. *PLOS ONE*
- 52 2018;**13**(12):e0207576 doi: 10.1371/journal.pone.0207576[published Online First: Epub
- 53 Date]].
- 54
- 55
- 56
- 57
- 58
- 59
- 60

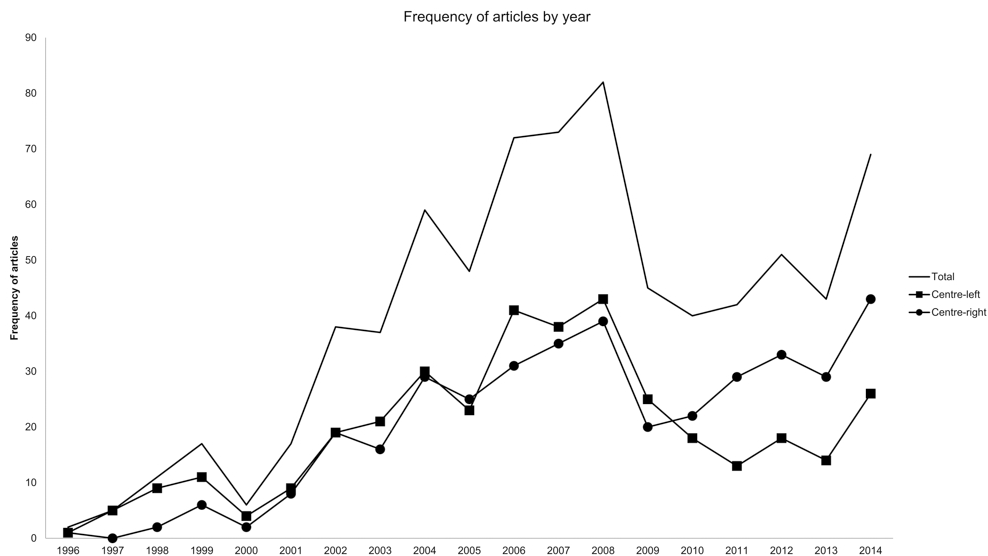

Figure 1. Frequency of articles by year

84x47mm (300 x 300 DPI)

1  
2  
3  
4  
5  
6  
7  
8  
9  
10  
11  
12  
13  
14  
15  
16  
17  
18  
19  
20  
21  
22  
23  
24  
25  
26  
27  
28  
29  
30  
31  
32  
33  
34  
35  
36  
37  
38  
39  
40  
41  
42  
43  
44  
45  
46  
47  
48  
49  
50  
51  
52  
53  
54  
55  
56  
57  
58  
59  
60

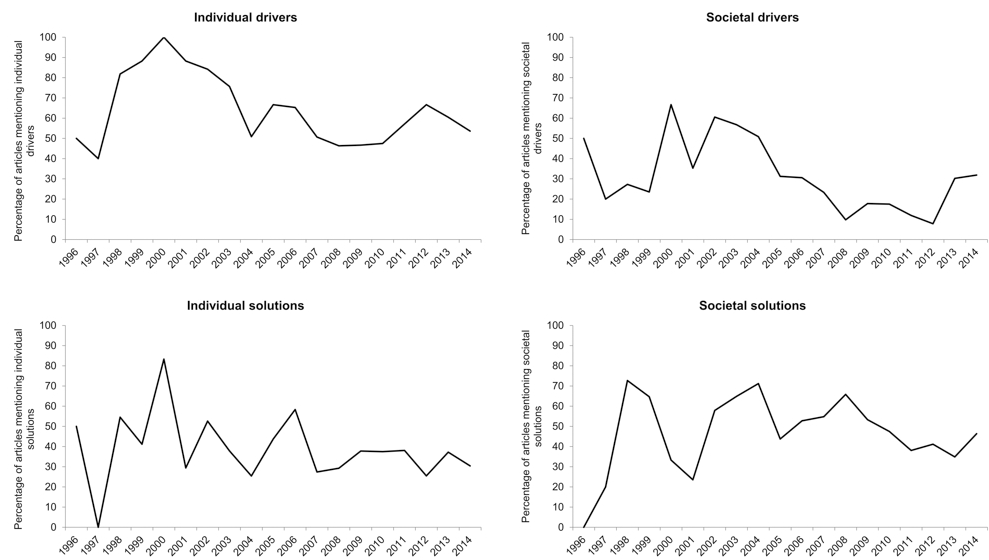

Figure 2. Trends in individual and societal drivers and solutions

84x47mm (300 x 300 DPI)

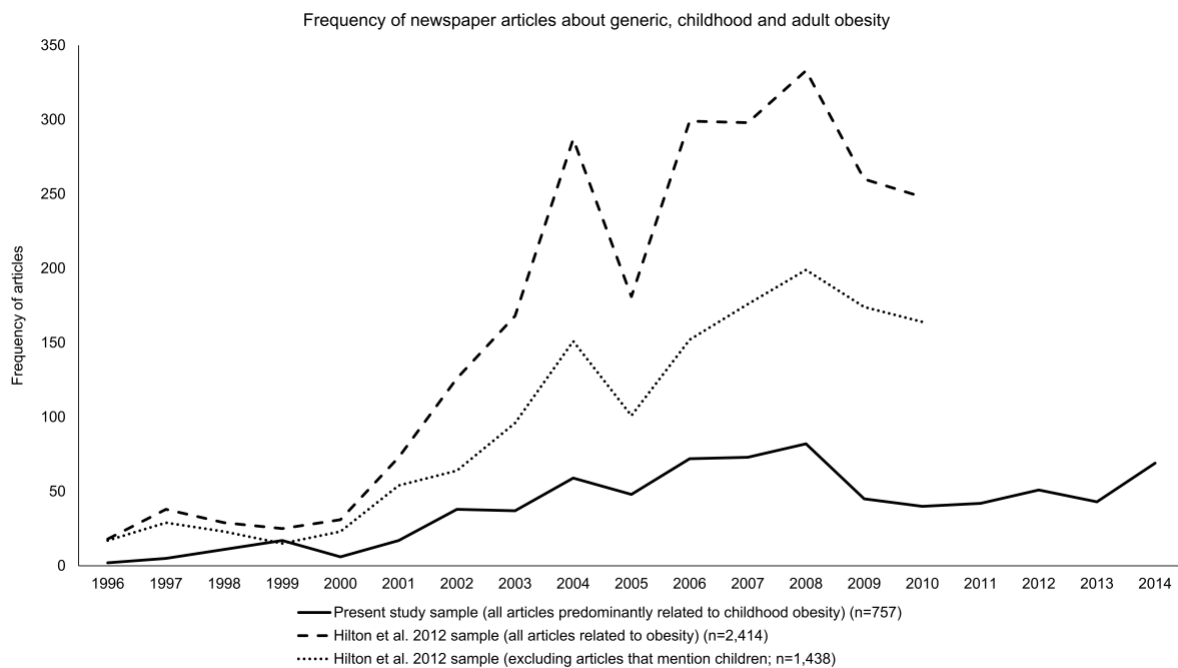

Proportion of articles within years mentioning different categories of drivers and solutions within articles about generic, childhood and adult obesity

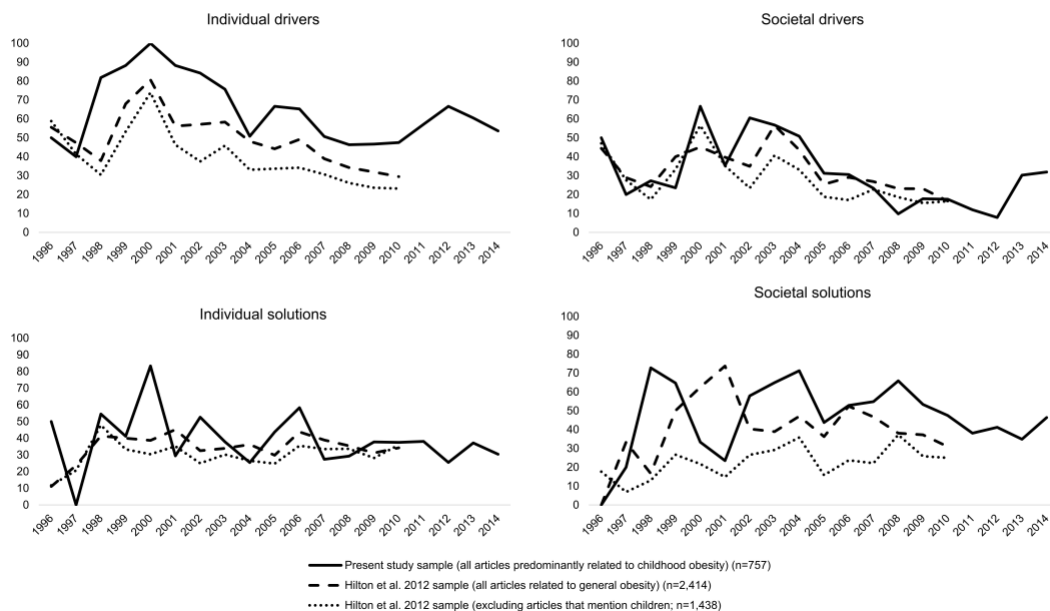



| No | Item                  | Guide and description                                                                                                                                                                                                                                                                                                                                                                                             | Reported on page |
|----|-----------------------|-------------------------------------------------------------------------------------------------------------------------------------------------------------------------------------------------------------------------------------------------------------------------------------------------------------------------------------------------------------------------------------------------------------------|------------------|
| 1  | Aim                   | State the research question the synthesis addresses.                                                                                                                                                                                                                                                                                                                                                              | Title and 8      |
| 2  | Synthesis methodology | Identify the synthesis methodology or theoretical framework which underpins the synthesis, and describe the rationale for choice of methodology ( <i>e.g. meta-ethnography, thematic synthesis, critical interpretive synthesis, grounded theory synthesis, realist synthesis, meta-aggregation, meta-study, framework synthesis</i> ).                                                                           | Title and 8      |
| 3  | Approach to searching | Indicate whether the search was pre-planned ( <i>comprehensive search strategies to seek all available studies</i> ) or iterative ( <i>to seek all available concepts until they theoretical saturation is achieved</i> ).                                                                                                                                                                                        | 8,9,10           |
| 4  | Inclusion criteria    | Specify the inclusion/exclusion criteria ( <i>e.g. in terms of population, language, year limits, type of publication, study type</i> ).                                                                                                                                                                                                                                                                          | 9                |
| 5  | Data sources          | Describe the information sources used ( <i>e.g. electronic databases (MEDLINE, EMBASE, CINAHL, psycINFO, Econlit), grey literature databases (digital thesis, policy reports), relevant organisational websites, experts, information specialists, generic web searches (Google Scholar) hand searching, reference lists</i> ) and when the searches conducted; provide the rationale for using the data sources. | 9                |

| No | Item                       | Guide and description                                                                                                                                                                                                                                                                                                                                                                             | Reported on page |
|----|----------------------------|---------------------------------------------------------------------------------------------------------------------------------------------------------------------------------------------------------------------------------------------------------------------------------------------------------------------------------------------------------------------------------------------------|------------------|
| 6  | Electronic Search strategy | Describe the literature search ( <i>e.g. provide electronic search strategies with population terms, clinical or health topic terms, experiential or social phenomena related terms, filters for qualitative research, and search limits</i> ).                                                                                                                                                   | 9                |
| 7  | Study screening methods    | Describe the process of study screening and sifting ( <i>e.g. title, abstract and full text review, number of independent reviewers who screened studies</i> ).                                                                                                                                                                                                                                   | 9                |
| 8  | Study characteristics      | Present the characteristics of the included studies ( <i>e.g. year of publication, country, population, number of participants, data collection, methodology, analysis, research questions</i> ).                                                                                                                                                                                                 | 9                |
| 9  | Study selection results    | Identify the number of studies screened and provide reasons for study exclusion ( <i>e.g. for comprehensive searching, provide numbers of studies screened and reasons for exclusion indicated in a figure/flowchart; for iterative searching describe reasons for study exclusion and inclusion based on modifications to the research question and/or contribution to theory development</i> ). | 9                |
| 10 | Rationale for appraisal    | Describe the rationale and approach used to appraise the included studies or selected findings ( <i>e.g. assessment of conduct (validity and robustness), assessment of reporting</i>                                                                                                                                                                                                             | 10               |

| No | Item                | Guide and description                                                                                                                                                                                                                                                                                | Reported on page |
|----|---------------------|------------------------------------------------------------------------------------------------------------------------------------------------------------------------------------------------------------------------------------------------------------------------------------------------------|------------------|
|    |                     | <i>(transparency), assessment of content and utility of the findings).</i>                                                                                                                                                                                                                           |                  |
| 11 | Appraisal items     | State the tools, frameworks and criteria used to appraise the studies or selected findings ( <i>e.g. Existing tools: CASP, QARI, COREQ, Mays and Pope [25]; reviewer developed tools; describe the domains assessed: research team, study design, data analysis and interpretations, reporting).</i> | 10               |
| 12 | Appraisal process   | Indicate whether the appraisal was conducted independently by more than one reviewer and if consensus was required.                                                                                                                                                                                  | 10               |
| 13 | Appraisal results   | Present results of the quality assessment and indicate which articles, if any, were weighted/excluded based on the assessment and give the rationale.                                                                                                                                                | NA               |
| 14 | Data extraction     | Indicate which sections of the primary studies were analysed and how were the data extracted from the primary studies? ( <i>e.g. all text under the headings “results /conclusions” were extracted electronically and entered into a computer software).</i>                                         | 10               |
| 15 | Software            | State the computer software used, if any.                                                                                                                                                                                                                                                            | 10               |
| 16 | Number of reviewers | Identify who was involved in coding and analysis.                                                                                                                                                                                                                                                    | 10               |

| No | Item                 | Guide and description                                                                                                                                                                                                                  | Reported on page |
|----|----------------------|----------------------------------------------------------------------------------------------------------------------------------------------------------------------------------------------------------------------------------------|------------------|
| 17 | Coding               | Describe the process for coding of data ( <i>e.g. line by line coding to search for concepts</i> ).                                                                                                                                    | 10               |
| 18 | Study comparison     | Describe how were comparisons made within and across studies ( <i>e.g. subsequent studies were coded into pre-existing concepts, and new concepts were created when deemed necessary</i> ).                                            | 11               |
| 19 | Derivation of themes | Explain whether the process of deriving the themes or constructs was inductive or deductive.                                                                                                                                           | NA               |
| 20 | Quotations           | Provide quotations from the primary studies to illustrate themes/constructs, and identify whether the quotations were participant quotations of the author's interpretation.                                                           | NA               |
| 21 | Synthesis output     | Present rich, compelling and useful results that go beyond a summary of the primary studies ( <i>e.g. new interpretation, models of evidence, conceptual models, analytical framework, development of a new theory or construct</i> ). | 15-19?           |

# BMJ Open

## Media framing of childhood obesity: a content analysis of UK newspapers from 1996-2014

|                                 |                                                                                                                                                                                                                                                              |
|---------------------------------|--------------------------------------------------------------------------------------------------------------------------------------------------------------------------------------------------------------------------------------------------------------|
| Journal:                        | <i>BMJ Open</i>                                                                                                                                                                                                                                              |
| Manuscript ID                   | bmjopen-2018-025646.R2                                                                                                                                                                                                                                       |
| Article Type:                   | Research                                                                                                                                                                                                                                                     |
| Date Submitted by the Author:   | 27-Feb-2019                                                                                                                                                                                                                                                  |
| Complete List of Authors:       | Nimegeer, Amy; Glasgow University, MRC/CSO Social and Public Health Sciences<br>Patterson, Chris; University of Glasgow, MRC/CSO Social & Public Health Sciences Unit<br>Hilton , Shona; University of Glasgow, MRC/CSO Social & Public Health Sciences Unit |
| <b>Primary Subject Heading</b>: | Communication                                                                                                                                                                                                                                                |
| Secondary Subject Heading:      | Sociology, Public health                                                                                                                                                                                                                                     |
| Keywords:                       | Health policy < HEALTH SERVICES ADMINISTRATION & MANAGEMENT, MEDICAL JOURNALISM, Community child health < PAEDIATRICS, PAEDIATRICS, PUBLIC HEALTH, STATISTICS & RESEARCH METHODS                                                                             |
|                                 |                                                                                                                                                                                                                                                              |

SCHOLARONE™  
Manuscripts

1  
2  
3 **TITLE:** Media framing of childhood obesity: a content analysis of UK newspapers from 1996-2014  
4  
5

6 **AUTHORS:** Amy Nimegeer<sup>1</sup>, Chris Patterson<sup>1</sup>, Shona Hilton<sup>1</sup>  
7  
8

9 **AFFILIATION:** <sup>1</sup>MRC/CSO Social and Public Health Sciences Unit, University of Glasgow, 200 Renfield  
10 Street, Glasgow, G2 3QB, United Kingdom  
11  
12

13  
14 **KEYWORDS:** Obesity, Children, Media, content analysis  
15  
16

17 **RUNNING TITLE:** UK Media framing of childhood obesity  
18  
19

20 **CONTACT INFORMATION:**

21 Dr Amy Nimegeer, MRC/CSO Social and Public Health Sciences Unit, University of Glasgow, 200  
22 Renfield Street, Glasgow, G2 3QB, United Kingdom  
23

24 [amy.nimegeer@glasgow.ac.uk](mailto:amy.nimegeer@glasgow.ac.uk)  
25

26  
27 Emails for additional authors: [chris.patterson@glasgow.ac.uk](mailto:chris.patterson@glasgow.ac.uk) ; [shona.hilton@glasgow.ac.uk](mailto:shona.hilton@glasgow.ac.uk)  
28  
29

30 **WORD COUNT (excluding cover page, abstract, references, tables, and figures):** 4166  
31  
32  
33  
34  
35  
36  
37  
38  
39  
40  
41  
42  
43  
44  
45  
46  
47  
48  
49  
50  
51  
52  
53  
54  
55  
56  
57  
58  
59  
60

## Abstract

*Background:* Media can influence public and policymakers' perceptions of causes of, and solutions to, public health issues through selective presentation and framing. Childhood obesity is a health issue with both individual- and societal-level drivers and solutions, but public opinion and mass media representations of obesity have typically focused on individual-level framings, at the cost of acknowledgement of a need for regulatory action.

*Objective and Setting:* To understand the salience and framing of childhood obesity across 19 years of UK national newspaper content.

*Design and Outcome Measures:* Quantitative content analysis of 757 articles about childhood obesity obtained from six daily and five Sunday newspapers. Articles were coded manually for definitions, drivers and potential solutions. Data were analysed statistically, including analysis of time trends and variations by political alignment of source.

*Results:* The frequency of articles grew from a low of two in 1996 to a peak of 82 in 2008, before declining to 40 in 2010. Individual-level drivers (59.8%) and solutions (36.5%) were mentioned more frequently than societal-level drivers (28.3%) and solutions (28.3%) across the sample, but societal solutions were mentioned more frequently during the final eight years, coinciding with a marked decline in yearly frequency of articles.

*Conclusions:* Increased focus on societal solutions aligns with public health goals, but coincided with a reduction in the issue's salience in the media. Those advocating public policy solutions to childhood obesity may benefit from seeking to raise the issue's media profile while continuing to promote structural conceptualisations of childhood obesity.

## Article Summary

### *Strengths and Limitations of this Study*

#### **Strengths**

- Methodology includes systematic analysis of a large sample of nineteen years of UK national newspaper coverage, facilitating statistical understandings of media frames of childhood obesity, including definitions, drivers and solutions
- Features robust manual coding and links to pre-existing dataset to strengthen analysis

#### **Weaknesses**

- Quantitative media content analysis is inherently less sensitive to nuance than qualitative analysis, and our analysis excluded some aspects of media content, such as images, which may influence readers' interpretations of the text they accompany
- Content analysis is a means of documenting what messages are presented by media, but cannot tell us how these messages are received by audiences

#### **Funding Statement**

AN, CP and SH's time for this research was funded by the Informing Healthy Public Policy programme (MC\_UU\_12017-15 and SPHSU15) of the MRC/CSO Social and Public Health Sciences Unit, University of Glasgow. The funding bodies had no role in the design, collection, analysis or interpretation of this study.

#### **Competing Interests**

SH, CP and AN declare no conflicts of interest.

#### **Acknowledgements**



1  
2  
3 The authors would like to thank Dr Jonathan Olsen of the MRC/CSO Social and Public Health Sciences  
4 Unit, University of Glasgow, for his advice regarding the conduct of multiple logistic regression  
5 analysis. We would also like to acknowledge the contribution of Dr Marie Löf and Dr Mark Daku to  
6 the design of this study.  
7  
8  
9  
10  
11  
12  
13  
14  
15  
16  
17  
18  
19  
20  
21  
22  
23  
24  
25  
26  
27  
28  
29  
30  
31  
32  
33  
34  
35  
36  
37  
38  
39  
40  
41  
42  
43  
44  
45  
46  
47  
48  
49  
50  
51  
52  
53  
54  
55  
56  
57  
58  
59  
60

For peer review only

## Introduction

Childhood obesity has been described as an international epidemic due to its high prevalence and rapid growth in numerous countries.<sup>1</sup> Globally, 13.4% of girls and 12.9% of boys in Low Income Countries, and 22.6% of girls, and 23.8% of boys in High Income Countries (classified by the World Bank) were classified as overweight or obese in 2013.<sup>2</sup> In England, one fifth of children in Reception year (age 4-5), and one third in Year 6 (age 10-11), were classified as overweight or obese in 2015/2016.<sup>3</sup> In Scotland, 28% of children aged 2-15 were classified as 'at risk of' overweight or obesity in 2015.<sup>4</sup> Childhood obesity has a broad range of short- and long-term health consequences,<sup>1</sup> tends to predict adolescent and adult obesity,<sup>5</sup> and is socioeconomically patterned.<sup>3</sup> For these reasons childhood obesity has been identified as a health priority for the UK and its devolved governments.<sup>6,7</sup>

Childhood obesity is a complex problem, with a complex set of drivers and potential solutions ranging from the individual to the environmental.<sup>8</sup> Ebbeling and colleagues<sup>1</sup> identify a wide range of causes, but argue that the problem *"can be primarily attributed to adverse environmental factors"*, and identify a need for *"straightforward, if politically difficult"* solutions spanning homes, schools, the built environment, health care, marketing, media and politics. This multi-level package of solutions echoes Friedman's assertion that a 'full-court press' targeting 'every dimension of the problem' is necessary.<sup>9</sup> However, while academia and public health are united on the need to target the obesogenic environment, Swinburn and colleagues<sup>10</sup> state that *"governments have largely abdicated the responsibility for addressing obesity to individuals, the private sector, and non-governmental organisations"*,<sup>10</sup> potentially due to anticipated or actual resistance, not just from corporations, but also electorates.<sup>9,11</sup> Indeed, public opinion research conducted in the US<sup>12</sup> and Germany<sup>13</sup> suggests that, while publics are in favour of tackling childhood obesity, they demonstrate less enthusiasm for regulative environmental interventions such as taxation. Hilbert characterises the German population

1  
2  
3 as “*ready for obesity prevention*”, but in need of education about the definition, prevalence and causes  
4  
5 of obesity.<sup>12</sup>  
6  
7

8 The media represent a key influence on public perceptions of health issues and policies, setting the  
9  
10 public agenda by granting differing levels of prominence to different topics<sup>14</sup> and influencing how  
11  
12 those issues are understood by building frames (focuses of attention) that include constructions of  
13  
14 problems, affected groups, drivers and solutions.<sup>15 16</sup> The influence of framing is well established in  
15  
16 relation to obesity. Researchers have used experimental designs to demonstrate that ‘individualised’  
17  
18 representations of childhood obesity tend to lead participants to assign greater blame to individuals  
19  
20 and exhibit less support for environmental regulation,<sup>17</sup> and that different representations of the  
21  
22 consequences of childhood obesity can influence participants’ attitudes towards policies.<sup>18</sup> Similarly,  
23  
24 Barry and colleagues demonstrated that people’s perceptions of obesity (as communicated through  
25  
26 agreement with metaphor-based descriptions of obesity) predict their support for public policy  
27  
28 interventions, illustrating how, for example, framing obesity as being driven by industry manipulation  
29  
30 may lead to increased support for a ‘junk-food tax’.<sup>19</sup>  
31  
32  
33  
34  
35

36 The media are frequently accused of contributing to obesity, particularly childhood obesity, through  
37  
38 its associations with sedentary behaviour, advertising of unhealthy commodities, promotion of  
39  
40 unrealistic body image, and other mechanisms.<sup>20</sup> Many researchers have studied media  
41  
42 representations of obesity in general,<sup>21-33</sup> but relatively few have focused specifically on  
43  
44 representations of childhood obesity, and these have been primarily in the US and Australia. Barry and  
45  
46 colleagues<sup>34</sup> studied US print and television news framing of childhood obesity, observing that  
47  
48 coverage of the issue grew between 2000 and 2009, and that individual-level behavioural solutions to  
49  
50 obesity were dominant, particularly on television. Similarly, Hawkins and Linvill<sup>35</sup> studied US  
51  
52 newspaper framing of childhood obesity over three discrete time periods in 1991, 2001 and 2006, and  
53  
54 identified a predominant focus on individual-level factors (both individual children and their parents)  
55  
56 in representations of both causes and solutions.  
57  
58  
59  
60

1  
2  
3 Bastian<sup>36</sup> analysed representations of childhood obesity in both Australian newspapers and academic  
4 literature in 2009, identifying predominantly individual framing within the media, compared to a  
5 social-structural framing in academic literature. Bastian<sup>36</sup> recommends that public health  
6 professionals work to redirect media attention towards structural drivers of childhood obesity. Maher  
7 and colleagues<sup>37</sup> analysed constructions of maternal responsibilities within Australian media coverage  
8 of childhood obesity, concluding that the dominant framing *“individualises maternal and child*  
9 *relationships rather than seeing mothering as embedded in broader social and economic structures”*,  
10 serving a neo-liberal agenda by diminishing the responsibility of wider society. This is consistent with  
11 the disproportionate focus on individual-level solutions identified by others.<sup>34-36 38</sup> While coverage of  
12 obesity in both adults and children appears to be characterised by individual-framing, it is notable that  
13 with adult obesity that individual responsibility is assigned to the person with obesity, while in  
14 childhood obesity that responsibility is predominantly assigned to parents, particularly mothers.<sup>39 40</sup>  
15 This distinction may complicate direct comparison between adult and child obesity, and the culturally-  
16 ingrained nature of the concept that parents (or mothers) are solely responsible for their children’s  
17 healthcare may represent a discursive obstacle to attempts to assign environmental solutions to  
18 childhood obesity.

19  
20  
21 In addition to traditional news media, researchers have analysed representations of childhood obesity  
22 in non-news media and new media. For example, Kalin and Fung’s<sup>38</sup> analysis of Spanish-language US  
23 parenting magazines’ representations of childhood obesity prevention and control echoes studies of  
24 news media representations of obesity, identifying greater focus on parental behaviour-change than  
25 system-level solutions, and limited recognition of social contextual factors. In recognition of the  
26 growing importance of user-generated social content and discussion, researchers have increasingly  
27 analysed content about childhood obesity on social media platforms.<sup>41 42</sup> While these new forms of  
28 media content represent an important aspect of the changing media landscape, traditional media  
29 outlets remain influential; despite the precipitous decline of UK print newspaper circulation,<sup>43</sup> the  
30 online presences of these hegemonic print news brands largely dominate online news readership,<sup>44</sup>

1  
2  
3 and typically define or legitimise news agendas for social media discussion.<sup>45 46</sup> However, it is also true  
4  
5 that the relationship between news media and social media is interconnected and complex: social  
6  
7 media trends are likely to influence the salience granted to issues by mainstream media outlets; social  
8  
9 media posts frequently find themselves the object of news media reporting; and readers' comments  
10  
11 on online traditional news articles can form part of the 'text' for subsequent readers. As an integral  
12  
13 part of this complex new landscape, traditional media remain a relevant subject for media analysis,  
14  
15 particularly when studying how representations evolve over timeframes predating the ascendancy of  
16  
17 new media.  
18  
19

20  
21  
22 The aim of this study is to further understandings of media representations of childhood obesity in  
23  
24 the UK context, using an approach informed by media framing theory,<sup>15 16</sup> analysing definitions of the  
25  
26 problem and constructions of drivers and solutions. This is important because, while childhood obesity  
27  
28 in the UK shares many similarities with that of other countries, the UK context differs in terms of  
29  
30 several elements including health service structure and media environment. The analysis will have  
31  
32 dual foci: the evolution of coverage between 1996 and 2014, and the relative salience of individual  
33  
34 and societal constructions of the drivers of, and potential solutions to, childhood obesity. To our  
35  
36 knowledge, this research will be the first empirical analysis of UK media framing of childhood obesity.  
37  
38  
39 This paper comprises the UK portion of a multi-country research project, the other parts of which will  
40  
41 be reported in separate papers.  
42  
43  
44

## 45 **Methods**

46  
47  
48 The media content analysis methods used were predominantly based on Hilton and colleagues' prior  
49  
50 study<sup>21</sup> of UK newspaper framing of obesity in the general population, adapted for this study's focus  
51  
52 on childhood obesity. This paper reports UK data that was part of a wider study that examined  
53  
54 childhood obesity media coverage in two other international contexts; Sweden and the United  
55  
56 States. Although content analysis is often viewed as an objective, descriptive approach, we subscribe  
57  
58 to Krippendorff's position that even the quantitative analysis of text is inherently an interpretive act,  
59  
60

1  
2  
3 and researchers should therefore acknowledge the individual bias that can arise from that process,  
4 seeking to minimise that bias through research design, while also embracing how researchers'  
5 contextual understandings can enrich coding and analysis beyond the crude 'objective' counting of  
6 content.  
7  
8  
9  
10  
11  
12

### 13 *Patient and Public Involvement*

14  
15  
16 Due to the nature of this study, patients/public were not involved.  
17  
18

### 19 *Sampling*

20  
21 A set of six daily newspapers and five Sunday newspapers with high circulation figures<sup>47</sup> and  
22 representing a variety of political alignments and markets (or 'genres') were chosen. Table 1 lists  
23 these publications and indicates their political alignments and the markets that they occupy.  
24  
25 Markets were defined as tabloid (typically sensationalist and politically diverse, with predominantly  
26 working-class readerships), middle-market tabloid (centre-right content with predominantly older,  
27 middle-class readerships) and quality (serious tone with predominantly middle-class readerships),  
28 using a typology used in prior studies of UK newspaper content<sup>21</sup>. Political alignment was  
29 determined by cross-referencing data on: the political party endorsed by each publication at the  
30 2017 UK general election;<sup>48</sup> readers' perceptions of newspapers' political alignment;<sup>49</sup> and the voting  
31 behaviours of each publications' readers in the 2015 UK general election.<sup>50</sup> A sample period of 1996  
32 to 2014 was chosen to encompass the time period covered in prior research,<sup>21</sup> in addition to a  
33 further four years of coverage that was extended to align with the time period covered by the other  
34 countries in our wider study (which will be described fully in a separate publication).  
35  
36  
37  
38  
39  
40  
41  
42  
43  
44  
45  
46  
47  
48  
49

50  
51 Identifying relevant articles from the chosen publications involved an initial database search,  
52 followed by manual filtering of search results. The Nexis database was searched for the presence of  
53 both the term 'obesity' OR 'obese' OR 'fat' and the term 'child' OR 'children' OR 'kid' OR 'kids' within  
54 the headlines of articles published within the selected newspapers. Each chosen publication was  
55  
56  
57  
58  
59  
60

1  
2  
3 archived comprehensively within the Nexis database, with the exceptions of the Daily Telegraph and  
4  
5 Sunday Telegraph prior to October 2000 and November 2000, respectively. As such, reporting from  
6  
7 those publications during the first five years of the sample period was not represented. The initial  
8  
9 search returned 1199 articles, which were subsequently subjected to manual application of  
10  
11 exclusion criteria, including: less than 50% of article content focussing on childhood obesity (i.e.  
12  
13 where more than half the article discussed another topic with only brief mention of childhood  
14  
15 obesity); being a reader's letter; or being part of television guide section. Following exclusion, the  
16  
17 final sample comprised 757 relevant articles.  
18  
19

### 20 21 22 *Coding*

23  
24 Article content was coded quantitatively using a coding frame adapted from one initially developed  
25  
26 by Hilton and colleagues.<sup>21</sup> The adapted coding frame was developed to record media frames of  
27  
28 childhood obesity in terms of definitions of the problem, mentions of specific biological, individual  
29  
30 and societal drivers, and biological, individual and societal solutions (itemised in Table 2). In addition,  
31  
32 the coding frame recorded whether the article was published on the front page of the publication,  
33  
34 and the length of the article in number of words. Articles were coded as relating to women/girls or  
35  
36 men/boys if members of that gender were described as being specifically problematic in relation to  
37  
38 childhood obesity (but not if rates for both genders were cited), or if the article profiled an individual  
39  
40 of a specific gender. Coding was performed by AN and CP, and 10% of articles were double-coded  
41  
42 blind to allow inter-rater agreement to be calculated. Cohen's kappa values for agreement on  
43  
44 individual codes are listed in Table 2. The threshold for acceptable agreement was set at 0.61  
45  
46 (defined by Landis and Koch as 'substantial' or better agreement),<sup>51</sup> and three codes were removed  
47  
48 due to insufficient agreement: dieting (such as fad diets) as a driver of childhood obesity;  
49  
50 normalisation of obesity as a driver of childhood obesity; and technological developments as a driver  
51  
52 of childhood obesity.  
53  
54  
55  
56  
57  
58  
59  
60

### *Analysis*

Statistical analysis was performed in STATA. Statistical procedures included: basic descriptive statistics; Cohen's kappa test of inter-rater agreement; linear regression of relationships between publication year and mentions of different categories of drivers and solutions; and multiple logistic regression of relationships between political alignment and individual aspects of framing. The multiple logistic regressions were adjusted by publication market because the markets represented were not distributed evenly by political alignment (as is the case in the UK newspaper industry), and previous research has identified significant variation in health news coverage by publication market.<sup>21 52 53</sup>

### *Comparative analysis*

Data from Hilton and colleagues' previous study on representations of general (not childhood-specific) obesity in the UK media were also analysed which had been collected and described fully elsewhere<sup>21</sup> to enable comparison of newspaper representations of obesity in children with obesity in adults, and obesity coverage more generally. This direct comparison was enabled by the intentional similarity of the methods of data collection, coding and analysis in the two studies.

## **Results**

### *Sample characteristics*

Table 1 summarises the political alignment and market of each publication in the sample, in addition to the frequency of articles and front-page articles within those publications, and the variation in word count within those articles. A total of 757 articles relevant to childhood obesity were identified within the selected six publications (five of which were combined with their corresponding Sunday counterparts). The frequency of coverage of childhood obesity varied between publications, ranging from the *Independent & Independent on Sunday* publishing 61 relevant articles, none of which were on front pages, to the *Mirror & Sunday Mirror*, which published 198 relevant articles, including two



1  
2  
3 front-page articles. The Daily Telegraph & Sunday Telegraph afforded the issue the greatest  
4  
5 prominence, featuring it on their front pages nine times.  
6  
7

8 **[Insert Table 1. Summary of article characteristics]**  
9

10  
11 The changing frequency of relevant articles within the sample between 1996 and 2014 are illustrated  
12  
13 in Figure 1, both overall and within each political alignment. The total number of relevant articles  
14  
15 per year rose steadily from 2 in 1996 to a high of 82 in 2008, before declining to 40 in 2010, and  
16  
17 finally rising again to 69 articles in 2014. The peak from 2006-08 was contemporaneous with the  
18  
19 publication of the UK Government's Foresight project report on reducing obesity<sup>8</sup> and its  
20  
21 corresponding mid-term and one-year reviews.  
22  
23  
24  
25

26 **[Insert Figure 1. Frequency of articles by year]**  
27

28 *Definitions of the problem of childhood obesity*  
29

30  
31 Table 2 illustrates the frequencies of articles mentioning specific problem definitions, drivers and  
32  
33 solutions related to childhood obesity, and Table 3 illustrates the extent to which publications'  
34  
35 political alignment predicted mentions of specific definitions. More than half of articles quantified  
36  
37 childhood obesity prevalence within the UK (n=413 54.6%), and a similar proportion described  
38  
39 obesity prevalence as rising, or having risen (n=389, 51.4%). Centre-right-aligned publications  
40  
41 mentioned increasing prevalence significantly less frequently than centre-left publications (OR:0.59;  
42  
43 p=0.001). Eighty (10.6%) articles quantified the prevalence of obesity outside of the UK.  
44  
45  
46

47 Approximately half of articles specifically described obesity as a health risk (n=397, 52.4%), and 102  
48  
49 (13.5%) described it as a burden to the National Health Service, and each of these themes were  
50  
51 more frequent in centre-left publications (OR:0.35, p=0.010; OR:0.50, p=0.008). Childhood obesity  
52  
53 was characterised as an economic burden to society in 74 (9.8%) articles, and significantly more so in  
54  
55 centre-left publications (OR:0.35, p=0.010).  
56  
57  
58

59 **[Insert Table 2. Frequency of mentions of problem definitions, drivers, and categories of solutions]**  
60

1  
2  
3 **[Insert Table 3. Likelihood of centre-right-aligned publications mentioning definitions of obesity]**  
4  
5

6 Few articles (n=23, 3.0%) characterised obesity as a cosmetic problem. Twice as many articles  
7 mentioned childhood obesity in relation to women and/or girls (n=112, 14.8%) as men and/or boys  
8 (n=56, 7.4%), and men and/or boys were more likely to be mentioned in centre-left publications  
9 than centre-right publications, after adjusting for market (OR:0.43, p=0.020).  
10  
11  
12  
13  
14  
15  
16  
17  
18

19 *Presentations of potential drivers of, and solutions to, childhood obesity*  
20

21  
22 Mentions of specific drivers of childhood obesity were coded and categorised as either individual  
23 (n=453, 59.8%), societal (n=214, 28.3%) or biological/genetic (n=70, 9.2%) drivers (Table 2). Societal  
24 drivers were mentioned more frequently in centre-left publications (OR:0.69, p=0.046). Frequently-  
25 mentioned individual drivers included parenting (n=246, 32.5%), diet (n=235, 31.0%) and insufficient  
26 exercise (n=224, 29.6%), while societal drivers included an abundance of unhealthy food (n=129,  
27 17.0%), marketing (n=90, 11.9%) and insufficient health services or facilities (n=53, 7.0%).  
28  
29  
30  
31  
32  
33  
34  
35

36 In addition to drivers, mentions of potential solutions to childhood obesity were coded into three  
37 corresponding categories: individual (n=276, 36.5%), societal (n=214, 28.3%) and biological (n=52,  
38 6.9%) (Table 2). Table 4 illustrates the extent to which publications' political alignment predicted  
39 mentions of specific drivers and solutions. After adjusting for publication market, centre-left  
40 publications were more likely to mention societal drivers (OR:0.69, p=0.046) and societal solutions  
41 (OR:0.54, p=0.000). Regarding specific societal drivers, centre-left publications were more likely to  
42 mention marketing (OR:0.55, p=0.030) the an abundance of fast food (OR:0.61, p=0.011), but the  
43 latter was only significant before adjusting for publication market.  
44  
45  
46  
47  
48  
49  
50  
51  
52  
53  
54

55 **[Insert Table 4. Likelihood of centre-right-aligned publications mentioning categories of driver and**  
56 **solution]**  
57  
58  
59  
60

### *Time trends in presentation of drivers and solutions*

Time trends in mentioning each category were analysed. Mentions of individual drivers (coefficient -0.068,  $p < 0.001$ ), individual solutions (coefficient -0.037,  $p = 0.041$ ), societal drivers (coefficient -0.097,  $p < 0.001$ ) and societal solutions (coefficient -0.044,  $p = 0.012$ ) each decreased significantly between 1996 and 2014. Neither biological/genetic drivers (coefficient -0.014,  $p = 0.637$ ) nor biological solutions (coefficient -0.020,  $p = 0.558$ ) varied significantly across the sample period.

Figure 2 illustrates the trends in individual and societal drivers and solutions. Individual drivers were mentioned particularly frequently (82-100%) between 1998 and 2000, before declining to between 46% and 67% of articles between 2004 and 2014. Mentions of individual solutions peaked at 83% in 2000, and subsequently declined, comprising 25-38% articles between 2007 and 2014. Mentions of societal drivers peaked at 67% in 2000, followed by a lower peak of 61% in 2002 and a subsequent lengthy decline to a low of 8% in 2012. Mentions of societal solutions exhibited a less linear decline than other categories, with peaks in 1998 (73%), 2004 (71%) and 2008 (66%), interspersed with declines. Notably, societal solutions were more commonly mentioned than individual solutions from 2007-2014.

**[Insert Figure 2. Trends in individual and societal drivers and solutions]**

### *Representations of childhood obesity in comparison to adult and general population obesity*

The data collected for this study were compared with data collected in Hilton and colleagues' 2012 study of newspaper representations of obesity in the general population.<sup>21</sup> Supporting information Figure S1 illustrates the yearly frequency of articles in each study's main sample, as well as a subsample of the previous study's data that excludes all articles that mentioned children. This represents a means of comparing representations of childhood obesity with representations of adult

1  
2  
3 and non-age-specific obesity. Figure S1 suggests that childhood obesity received less newspaper  
4 coverage than adult obesity in every year covered by the two datasets, with the exception of 1999.  
5  
6 The longer time period represented in the current study suggests that the decrease in publication  
7  
8 frequency in 2008-2010 observed in the previous study<sup>21</sup> did not continue in subsequent years, at  
9  
10  
11  
12 least on the topic childhood obesity.

13  
14  
15 Supporting information Figure S2 illustrates the frequency of coverage of the two categories of  
16  
17 driver and solution, individual and societal, within the present and prior sample.<sup>21</sup> Comparison of the  
18  
19 data indicates that coverage of childhood obesity was characterised by greater focus on individual  
20  
21 drivers and societal solutions than coverage of adult obesity, while coverage of societal drivers and  
22  
23 individual solutions was relatively similar.  
24  
25  
26  
27  
28  
29

### 30 **Discussion**

31  
32  
33 By systematically analysing the content of 757 articles, we arrived at several key findings related to  
34  
35 UK national newspapers' representations of childhood obesity. Coverage of the issue grew steadily  
36  
37 from two articles in 1996 to a high of 82 articles in 2008, after which article frequency declined to 45  
38  
39 in 2009, before rising to a second peak of 69 in 2014. Childhood obesity was predominantly  
40  
41 characterised as driven by individual-level factors, particularly parenting, dietary behaviours and  
42  
43 inactivity, though societal drivers such as marketing were also identified. Similarly, there was greater  
44  
45 focus on individual-level solutions than societal-level solutions. Societal constructions of the drivers  
46  
47 of, and solutions to, obesity, were significantly more frequent within centre-left publications than  
48  
49 centre-right. Analysis of time trends provided evidence of a small shift towards societal  
50  
51 conceptualisations, with mentions of social solutions outnumbering individual solutions throughout  
52  
53 the latter half of the sample period. Childhood obesity was frequently defined as a health risk in  
54  
55  
56  
57  
58  
59  
60

1  
2  
3 approximately half of articles, and was associated with females substantially more frequently than  
4  
5 males, but more nuanced coding of gender-representation in these articles is required.  
6  
7

8 Centre-left publications' greater focus on societal constructions of the causes of, and solutions to  
9  
10 childhood obesity, and on the societal and health service burdens of childhood obesity, are in line  
11  
12 with the communal and individual framings associated with left- and right-wing political ideologies.  
13  
14 Entman describes the core process of building frames as "[selecting] some aspects of a perceived  
15  
16 reality and [making] them more salient"<sup>16</sup>, and this process is evident in UK newspaper  
17  
18 representations of childhood obesity, with centre-left publications building frames that incorporate  
19  
20 societal aspects of the childhood obesity problem, while centre-right publications omit them.  
21  
22  
23

24  
25 This research comprised a systematic analysis of a large sample of nineteen years of UK national  
26  
27 newspaper coverage, facilitating statistical understandings of media frames of childhood obesity,  
28  
29 including definitions, drivers and solutions. However, the research is subject to some limitations. The  
30  
31 *Nexis* database does not archive articles from the Daily Telegraph and Sunday Telegraph prior to  
32  
33 October 2000 and November 2000, respectively. However, the low frequency of reporting on  
34  
35 childhood obesity prior to 2000 in the other sources in the sample during those years suggests that  
36  
37 the absence of those two sources is unlikely to have had a relevant impact on our analysis. The  
38  
39 method allowed quantitative analysis of a media frames across a large sample, but not the nuanced  
40  
41 analysis of specific aspects of framing that qualitative analysis would permit.  
42  
43  
44

45  
46 The coding frame was extensive, but subject to certain limitations. Coding did not record the types  
47  
48 of issues discussed by each articles, which may have been valuable given the variety of different  
49  
50 perspectives from which the issue may be viewed. Further, while mentions of males and females in  
51  
52 relation to obesity in children were coded, coding did not differentiate between mentions of boys  
53  
54 with obesity, girls with obesity, male parents and female parents. Given the frequently gendered  
55  
56 nature of societal discourse about obesity, future research may benefit from analysing gendered  
57  
58 representations of both children and parents within news coverage of childhood obesity.  
59  
60

1  
2  
3 Additionally, future research may benefit from widening the search scope from childhood obesity to  
4 also cover childhood overweight. Our search terms were used to replicate those in a previous study  
5 (ref to Swedish paper) as therefore do not include the term 'childhood', which could lead to some  
6 relevant articles being missed. However, test searches suggest that incorporating the term  
7 'childhood' into the search string returns negligible additional articles from UK national newspapers,  
8 so it is unlikely that those absent articles would have substantially affected the analysis. Further  
9 limitations of the research stem from decisions made about the type of content analysed. The sole  
10 focus on article text was at the cost of analysing images, which have been found to be an important  
11 aspect of media representations of obesity.<sup>23 31 54 55</sup> Further, the focus on newspaper content was at  
12 the expense of data from other news sources, such as television and online news, or alternative  
13 sources, such as reader comments or social media posts. We argue that our focus on the evolution  
14 of the debate over time is not well suited to the rapidly-changing online news environment, but  
15 acknowledge that incorporating other types of source could be valuable, as representations of  
16 childhood obesity have been found to vary by medium in the US.<sup>34</sup> Finally, while links between  
17 media representations and public perceptions are well established, content analysis can only  
18 describe content, not determine how that content is received by audiences.

19  
20  
21  
22  
23  
24  
25  
26  
27  
28  
29  
30  
31  
32  
33  
34  
35  
36  
37  
38  
39  
40 This research built upon prior research examining media framing of general obesity<sup>21</sup> by extending  
41 the time period covered, taking a sole focus on childhood obesity, and comparing coverage of  
42 childhood obesity to that of obesity in general. As would be expected, the growth in coverage of  
43 childhood obesity from 1996 to 2008 identified in our prior research<sup>21</sup> was replicated in the present  
44 research, but it was found that the rise did not continue beyond 2008, although it remained at an  
45 elevated level of coverage relative to pre-2002. Further research might investigate whether the  
46 increase in article frequency in the final year of the study period is indicative of a prolonged rise in  
47 coverage beyond 2014. Although it is likely that coverage of childhood obesity in 2007-8 was  
48 elevated due to dissemination of, and activities related to, the UK Government's Foresight report  
49 *Reducing obesity: future choices*, published in October 2007,<sup>8</sup> this trend mirrors that found in Barry  
50  
51  
52  
53  
54  
55  
56  
57  
58  
59  
60

1  
2  
3 and colleagues'<sup>34</sup> content analysis of US television and print news coverage of childhood obesity  
4 suggesting that, despite locally-relevant policy events, trends in coverage of childhood obesity may  
5 follow transnational patterns. Barry and colleagues<sup>34</sup> suggest that the decline in coverage may be an  
6 example of Downs'<sup>56</sup> "issue attention cycle", in which public attention to a specific issue will  
7 inevitably decline regardless of whether that issue reaches any conclusion. However, one area  
8 where our findings depart from those of Barry and colleagues<sup>34</sup> is in individual and structural causes  
9 of childhood obesity, which they found to be equally frequent within the newspaper articles in the  
10 their sample.  
11  
12  
13  
14  
15  
16  
17  
18  
19  
20  
21

22 Both the original study by Hilton and colleagues and the present study present some evidence of a  
23 shift away from a focus on individual constructions of drivers and solutions across their respective  
24 time periods. However, comparison of the two pieces of research suggests that, in comparison to  
25 general obesity, media frames of childhood obesity have a greater tendency to attribute  
26 responsibility to individuals. The disproportionate individual-level framing of childhood obesity  
27 might be explained by the presence of parents as mediators between children and public policy.  
28  
29  
30  
31  
32  
33  
34

35 While children are vulnerable to societal and environmental pressures, and are often publicly viewed  
36 as deserving of legislative protection,<sup>57-59</sup> public discourse around childhood obesity may attribute  
37 greater individual responsibility to parents.<sup>60</sup> Hawkins and Linvill found that US news frequently  
38 identifies parents as both responsible for, and responsible for addressing, children's obesity, and  
39 conclude that this framing represents an obstacle to stimulating demand for a public policy response  
40 to the problem.<sup>35</sup> Boero's qualitative analysis of US media representations of childhood obesity  
41 identifies parents, and particularly mothers, as being 'under fire' for failing to foster healthy  
42 behaviours in their children.<sup>28</sup> Unlike in debates around unhealthy phenomena such as exposure to  
43 second-hand smoke, in which an adult lifestyle product may be perceived as unfairly invading  
44 children's spaces, feeding children occupies a complex position of being nurturing and essential,  
45 while also being a potential source of long-term health harms.<sup>60</sup>  
46  
47  
48  
49  
50  
51  
52  
53  
54  
55  
56  
57  
58  
59  
60

1  
2  
3 For media content to drive public appetite for policy solutions to childhood obesity, media must  
4  
5 both raise perceptions of the issue, through heightened coverage, and frame the issue as one  
6  
7 demanding societal-level, rather than solely individual-level, solutions. Our research demonstrates  
8  
9 that, while the salience of childhood obesity in UK national newspapers rose steadily from 1996-  
10  
11 2008, that level of attention was not maintained subsequent to 2008, although there is reason to  
12  
13 suggest that this may change in 2017/18 with media coverage of the incoming levy on sugar-  
14  
15 sweetened beverages in the UK.<sup>61</sup> While this faltering frequency of reporting may be undesirable for  
16  
17 raising public consciousness, our analysis suggests that the frames constructed within those later  
18  
19 years were characterised by a predominance of social solutions over individual solutions, which, if  
20  
21 internalised by audiences, may stimulate public appetites for engaging the problem at the public  
22  
23 policy level. Notably, this shift from individual to social framing occurred despite the well-  
24  
25 documented complications caused by parents' roles as mediators between public policy and  
26  
27 children's health behaviours. Taking these key findings into account, this study supports a mixed  
28  
29 view of UK media framing of childhood obesity, in which positive changes in framing may be  
30  
31 undermined by a decrease in salience. Those advocating for public policy responses to childhood  
32  
33 obesity may seek to raise the issue's media profile, while continuing to promote social framings.  
34  
35  
36  
37  
38  
39  
40  
41  
42  
43  
44  
45  
46  
47  
48

#### 49 **Author Statement**

50  
51  
52 SH, CP and AN: study planning and conceptualisation; AN and CP: data coding; AN and CP: data  
53  
54 analysis; AN and CP: drafting manuscript; SH: critical review of the manuscript.  
55  
56

#### 57 **Data Statement**



1  
2  
3 Data were accessed from the Nexis newspaper database at <https://www.nexis.com>  
4  
5  
6  
7  
8  
9  
10  
11  
12  
13  
14  
15  
16  
17  
18  
19  
20  
21  
22  
23  
24  
25  
26  
27  
28  
29  
30  
31  
32  
33  
34  
35  
36  
37  
38  
39  
40  
41  
42  
43  
44  
45  
46  
47  
48  
49  
50  
51  
52  
53  
54  
55  
56  
57  
58  
59  
60

For peer review only

## TABLES:

Table 1. Summary of article characteristics

| Publication                         | Political alignment | Market        | All articles |              | Front-page articles |            | Word count   |            |              |
|-------------------------------------|---------------------|---------------|--------------|--------------|---------------------|------------|--------------|------------|--------------|
|                                     |                     |               | n            | %*           | n                   | %**        | 1st quartile | Median     | 3rd quartile |
| Guardian & Observer                 | Centre-left         | Quality       | 109          | 14.4         | 5                   | 4.6        | 457          | 680        | 907          |
| Independent & Independent on Sunday | Centre-left         | Quality       | 61           | 8.1          | 0                   | -          | 247          | 474        | 690          |
| Mirror & Sunday Mirror              | Centre-left         | Tabloid       | 198          | 26.2         | 2                   | 1.0        | 121          | 219        | 459          |
| Daily Telegraph & Sunday Telegraph  | Centre-right        | Quality       | 107          | 14.1         | 9                   | 8.4        | 182          | 346        | 502          |
| Daily Mail & Mail on Sunday         | Centre-right        | Middle-market | 134          | 17.7         | 6                   | 4.5        | 263          | 438        | 672          |
| Sun                                 | Centre-right        | Tabloid       | 148          | 19.6         | 0                   | -          | 98           | 195        | 337          |
| <b>Total</b>                        |                     |               | <b>757</b>   | <b>100.0</b> | <b>22</b>           | <b>2.9</b> | <b>151</b>   | <b>325</b> | <b>595</b>   |

\*percentage within whole sample

\*\*percentage of front-page articles within publication

Table 2. Frequency of mentions of problem definitions, drivers, and categories of solutions

| Theme                                                | Total (n=757) |      | Inter-rater agreement* |
|------------------------------------------------------|---------------|------|------------------------|
|                                                      | n             | %    |                        |
| <b>Problem definitions</b>                           |               |      |                        |
| Quantifies obesity prevalence within the UK          | 413           | 54.6 | 0.834                  |
| Quantifies obesity prevalence elsewhere              | 80            | 10.6 | 0.814                  |
| Mentions increase in obesity rates                   | 389           | 51.4 | 0.940                  |
| Mentions obesity as a risk to health                 | 397           | 52.4 | 0.893                  |
| Mentions obesity as a cosmetic problem               | 23            | 3.0  | 0.850                  |
| Mentions obesity as a burden to NHS                  | 102           | 13.5 | 0.814                  |
| Mentions obesity as an economic burden to society    | 32            | 4.2  | 0.630                  |
| Mentions socio-economic and geographical differences | 74            | 9.8  | 0.706                  |
| Mentions women and/or girls                          | 112           | 14.8 | 0.706                  |
| Mentions men and/or boys                             | 56            | 7.4  | 0.706                  |
| Obesity is not a problem, over-hyped etc.            | 93            | 12.3 | 0.850                  |
| Mentions discrimination, bullying or stigmatisation  | 70            | 9.2  | 1.000                  |
| <b>Drivers of obesity</b>                            |               |      |                        |
| <i>Overall drivers</i>                               |               |      |                        |
| Any drivers mentioned                                | 522           | 69.0 | n/a**                  |
| Any biological/genetic driver mentioned              | 70            | 9.2  | n/a**                  |
| Any individual driver mentioned                      | 453           | 59.8 | n/a**                  |
| Any societal driver mentioned                        | 214           | 28.3 | n/a**                  |
| <i>Individual drivers</i>                            |               |      |                        |
| Mentions poor diet, overeating                       | 235           | 31.0 | 0.857                  |
| Mentions poor self-control, willpower or choices     | 60            | 7.9  | 0.680                  |
| Mentions insufficient exercise, sedentary lifestyle  | 224           | 29.6 | 0.919                  |
| Mentions parenting shortcomings                      | 246           | 32.5 | 0.939                  |
| <i>Societal drivers</i>                              |               |      |                        |
| Mentions an abundance of processed/fast food         | 129           | 17.0 | 0.752                  |
| Mentions a lack of health services or facilities     | 53            | 7.0  | 0.945                  |
| Mentions food/drink advertising and promotions       | 90            | 11.9 | 1.000                  |
| <b>Solutions to obesity</b>                          |               |      |                        |
| Any solution mentioned                               | 538           | 71.1 | n/a**                  |
| Individual solution mentioned                        | 276           | 36.5 | 0.920                  |
| Societal solution mentioned                          | 214           | 28.3 | 0.839                  |
| Biological solution mentioned                        | 52            | 6.9  | 1.000                  |

\*Cohen's kappa test of inter-rater agreement.

\*\*Agreement was not calculated for these variables as they were computed from other, manually-coded variables

Table 3. Likelihood of centre-right-aligned publications mentioning definitions of obesity

|                                                             | Unadjusted |           |              | Adjusted* |           |              |
|-------------------------------------------------------------|------------|-----------|--------------|-----------|-----------|--------------|
|                                                             | OR         | 95% CI    | P-value      | OR        | 95% CI    | P-value      |
| <b>Problem definitions</b>                                  |            |           |              |           |           |              |
| <i>Quantifies obesity prevalence within the UK</i>          | 0.97       | 0.73-1.30 | 0.858        | 0.92      | 0.67-1.27 | 0.608        |
| <i>Quantifies obesity prevalence elsewhere</i>              | 0.63       | 0.40-1.01 | 0.057        | 0.59      | 0.34-1.03 | 0.065        |
| <i>Mentions increase in obesity rates</i>                   | 0.70       | 0.52-0.93 | <b>0.014</b> | 0.59      | 0.42-0.81 | <b>0.001</b> |
| <i>Mentions obesity as a risk to health</i>                 | 1.02       | 0.77-1.36 | 0.885        | 0.88      | 0.64-1.22 | 0.456        |
| <i>Mentions obesity as a cosmetic problem</i>               | 0.40       | 0.16-0.99 | <b>0.048</b> | 0.35      | 0.11-1.05 | 0.061        |
| <i>Mentions obesity as a burden to NHS</i>                  | 0.57       | 0.37-0.87 | <b>0.009</b> | 0.50      | 0.30-0.83 | <b>0.008</b> |
| <i>Mentions obesity as an economic burden to society</i>    | 0.36       | 0.19-0.70 | <b>0.003</b> | 0.35      | 0.16-0.78 | <b>0.010</b> |
| <i>Mentions socio-economic and geographical differences</i> | 0.62       | 0.38-1.00 | 0.051        | 0.85      | 0.51-1.43 | 0.547        |
| <i>Mentions women and/or girls</i>                          | 0.86       | 0.58-1.29 | 0.467        | 0.77      | 0.48-1.23 | 0.271        |
| <i>Mentions men and/or boys</i>                             | 0.59       | 0.34-1.03 | 0.062        | 0.43      | 0.22-0.88 | <b>0.020</b> |
| <i>Obesity is not a problem, over-hyped etc.</i>            | 0.75       | 0.29-1.93 | 0.552        | 0.73      | 0.25-2.15 | 0.565        |
| <i>Mentions discrimination, bullying or stigmatisation</i>  | 0.56       | 0.36-0.87 | <b>0.010</b> | 0.44      | 0.25-0.76 | <b>0.003</b> |

\*Adjusted for publication market

Table 4. Likelihood of centre-right-aligned publications mentioning categories of driver and solution

|                                                            | Unadjusted |           |              | Adjusted* |           |              |
|------------------------------------------------------------|------------|-----------|--------------|-----------|-----------|--------------|
|                                                            | OR         | 95% CI    | P-value      | OR        | 95% CI    | P-value      |
| <b>Drivers of obesity</b>                                  |            |           |              |           |           |              |
| Overall drivers                                            |            |           |              |           |           |              |
| <i>Any drivers mentioned</i>                               |            |           |              |           |           |              |
|                                                            | 0.90       | 0.66-1.23 | 0.505        | 0.78      | 0.56-1.10 | 0.162        |
| <i>Any biological/genetic driver mentioned</i>             |            |           |              |           |           |              |
|                                                            | 0.73       | 0.45-1.20 | 0.214        | 0.85      | 0.49-1.46 | 0.557        |
| <i>Any individual driver mentioned</i>                     |            |           |              |           |           |              |
|                                                            | 1.00       | 0.75-1.34 | 0.974        | 0.84      | 0.61-1.16 | 0.292        |
| <i>Any societal driver mentioned</i>                       |            |           |              |           |           |              |
|                                                            | 0.62       | 0.45-0.86 | <b>0.004</b> | 0.69      | 0.48-0.99 | <b>0.046</b> |
| Individual drivers                                         |            |           |              |           |           |              |
| <i>Mentions poor diet, overeating</i>                      |            |           |              |           |           |              |
|                                                            | 0.73       | 0.54-0.99 | <b>0.045</b> | 0.65      | 0.46-0.93 | <b>0.018</b> |
| <i>Mentions poor self-control, willpower or choices</i>    |            |           |              |           |           |              |
|                                                            | 0.61       | 0.35-1.04 | 0.068        | 0.71      | 0.39-1.28 | 0.255        |
| <i>Mentions insufficient exercise, sedentary lifestyle</i> |            |           |              |           |           |              |
|                                                            | 0.75       | 0.55-1.03 | 0.077        | 0.67      | 0.47-0.97 | <b>0.032</b> |
| <i>Mentions parenting shortcomings</i>                     |            |           |              |           |           |              |
|                                                            | 1.14       | 0.84-1.55 | 0.386        | 1.08      | 0.77-1.52 | 0.660        |
| Societal drivers                                           |            |           |              |           |           |              |
| <i>Mentions an abundance of processed/fast food</i>        |            |           |              |           |           |              |
|                                                            | 0.61       | 0.41-0.89 | <b>0.011</b> | 0.73      | 0.48-1.12 | 0.153        |
| <i>Mentions a lack of health services or facilities</i>    |            |           |              |           |           |              |
|                                                            | 0.90       | 0.52-1.58 | 0.725        | 0.87      | 0.46-1.65 | 0.671        |
| <i>Mentions food/drink advertising and promotions</i>      |            |           |              |           |           |              |
|                                                            | 0.56       | 0.36-0.88 | <b>0.012</b> | 0.55      | 0.32-0.94 | <b>0.030</b> |
| <b>Solutions to obesity</b>                                |            |           |              |           |           |              |
| <i>Biological</i>                                          |            |           |              |           |           |              |
|                                                            | 0.73       | 0.42-1.29 | 0.286        | 0.54      | 0.26-1.09 | 0.087        |
| <i>Individual</i>                                          |            |           |              |           |           |              |
|                                                            | 0.90       | 0.67-1.20 | 0.464        | 0.90      | 0.64-1.25 | 0.527        |
| <i>Societal</i>                                            |            |           |              |           |           |              |
|                                                            | 0.62       | 0.46-0.83 | <b>0.001</b> | 0.54      | 0.39-0.75 | <b>0.000</b> |

\*Adjusted for publication market

1  
2  
3  
4  
5  
6  
7  
8  
9  
10  
11  
12  
13  
14  
15  
16  
17  
18  
19  
20  
21  
22  
23  
24  
25  
26  
27  
28  
29  
30  
31  
32  
33  
34  
35  
36  
37  
38  
39  
40  
41  
42  
43  
44  
45  
46  
47  
48  
49  
50  
51  
52  
53  
54  
55  
56  
57  
58  
59  
60

For peer review only

## References

1. Ebbeling CB, Pawlak DB, Ludwig DS. Childhood obesity: public-health crisis, common sense cure. *Lancet* 2002;**360**(9331):473-82
2. Ng M, Fleming T, Robinson M, et al. Global, regional, and national prevalence of overweight and obesity in children and adults during 1980–2013: a systematic analysis for the Global Burden of Disease Study 2013. *Lancet* 2014;**384**(9945):766-81
3. NHS Digital. Statistics on Obesity, Physical Activity and Diet, 2017.
4. Scottish Government. The Scottish Health Survey: 2015 edition. Edinburgh: Scottish Government, 2015.
5. Simmonds M, Llewellyn A, Owen CG, et al. Predicting adult obesity from childhood obesity: a systematic review and meta-analysis. *Obesity Reviews* 2016;**17**(2):95-107 doi: 10.1111/obr.12334[published Online First: Epub Date] | .
6. HM Government. Childhood obesity: a plan for action, 2017.
7. Scottish Government. Increase the proportion of healthy weight children. Secondary Increase the proportion of healthy weight children 2016. <http://www.gov.scot/About/Performance/scotPerforms/indicator/healthyweight>.
8. Butland B, Jebb S, Kopelman P, et al. Foresight. Tackling Obesities: Future Choices - Project report. 2nd ed. London: Government Office for Science, 2007.
9. Friedman DA. Public health regulation and the limits of paternalism. *Conn L Rev* 2013;**46**:1687
10. Swinburn BA, Sacks G, Hall KD, et al. The global obesity pandemic: shaped by global drivers and local environments. *Lancet* 2011;**378**(9793):804-14
11. Swinburn BA. Obesity prevention: the role of policies, laws and regulations. *Australia and New Zealand health policy* 2008;**5**(1):12
12. Hilbert A, Rief W, Braehler E. What determines public support of obesity prevention? *J Epidemiol Community Health* 2007;**61**(7):585
13. Evans WD, Finkelstein EA, Kamerow DB, et al. Public perceptions of childhood obesity. *Am J Prev Med* 2005;**28**(1):26-32 doi: <http://dx.doi.org/10.1016/j.amepre.2004.09.008>[published Online First: Epub Date] | .
14. McCombs ME, Shaw DL. The agenda-setting function of mass media. *Public Opin Q* 1972;**36**(2):176-87
15. Scheufele DA, Tewksbury D. Framing, agenda setting, and priming: The evolution of three media effects models. *J Commun* 2007;**57**(1):9-20
16. Entman RM. Framing: Toward clarification of a fractured paradigm. *J Commun* 1993;**43**(4):51-58
17. Barry CL, Brescoll VL, Gollust SE. Framing Childhood Obesity: How Individualizing the Problem Affects Public Support for Prevention. *Polit Psychol* 2013:n/a-n/a doi: 10.1111/pops.12018[published Online First: Epub Date] | .
18. Gollust SE, Niederdeppe J, Barry CL. Framing the Consequences of Childhood Obesity to Increase Public Support for Obesity Prevention Policy. *Am J Public Health* 2013;**103**(11):e96-e102 doi: 10.2105/ajph.2013.301271[published Online First: Epub Date] | .
19. Barry CL, Brescoll VL, Brownell KD, et al. Obesity Metaphors: How Beliefs about the Causes of Obesity Affect Support for Public Policy. *Milbank Q* 2009;**87**(1):7-47 doi: 10.1111/j.1468-0009.2009.00546.x[published Online First: Epub Date] | .
20. Boyce T. The media and obesity. *Obesity Reviews* 2007;**8**:201-05 doi: 10.1111/j.1467-789X.2007.00342.x[published Online First: Epub Date] | .
21. Hilton S, Patterson C, Teyhan A. Escalating coverage of obesity in UK newspapers: the evolution and framing of the “obesity epidemic” from 1996 to 2010. *Obes* 2012;**20**(8):1688-95
22. Hilbert A, Ried J. Obesity in Print: An Analysis of Daily Newspapers. *Obesity Facts* 2009;**2**(1):46-51
23. Patterson C, Hilton S. Normalisation and Stigmatisation of Obesity in UK Newspapers: a Visual Content Analysis. *The Open Obesity Journal* 2013;**5**:82-91 doi: 10.2174/1876823720131001011[published Online First: Epub Date] | .

24. Flint SW, Hudson J, Lavalley D. The portrayal of obesity in UK national newspapers. *Stigma and Health* 2016;**1**(1):16
25. Islam S, Fitzgerald L. Indigenous obesity in the news: a media analysis of news representation of obesity in Australia's Indigenous population. *BMC obesity* 2016;**3**(1):30
26. Atanasova D. Obesity frames in British and German online newspapers, 2009-2011. Department of Media and Communication, 2015.
27. Bonfiglioli C. Overweight and Obesity in TV News. *Values and Choices in Television Discourse: Springer*, 2015:87-108.
28. Boero N. All the news that's fat to print: the American "obesity epidemic" and the media. *Qualitative Sociology* 2007;**30**(1):41-60
29. Lawrence RG. Framing obesity: The evolution of news discourse on a public health issue. *Harvard International Journal of Press/Politics* 2004;**9**(3):56-75 doi: citeulike-article-id:4228152[published Online First: Epub Date]].
30. Kim S-H, Willis LA. Talking about Obesity: News Framing of Who Is Responsible for Causing and Fixing the Problem. *Journal of Health Communication* 2007;**12**(4):359-76 doi: 10.1080/10810730701326051[published Online First: Epub Date]].
31. Gollust SE, Eboh I, Barry CL. Picturing obesity: Analyzing the social epidemiology of obesity conveyed through US news media images. *Soc Sci Med* 2012;**74**(10):1544-51
32. Jeong M, Gilmore JS, Bleakley A, et al. Local news media framing of obesity in the context of a sugar-sweetened beverage reduction media campaign. *Journal of nutrition education and behavior* 2014;**46**(6):583-88
33. Varava K. Visual framing, stigmatization, race, and obesity: Examining television news presentation of stories about obesity and stories about health. *Communication Studies* 2016;**67**(5):509-29
34. Barry CL, Jarlenski M, Grob R, et al. News media framing of childhood obesity in the United States from 2000 to 2009. *Pediatrics* 2011;**128**(1):132-45 doi: peds.2010-3924 [pii] 10.1542/peds.2010-3924[published Online First: Epub Date]].
35. Hawkins KW, Linvill DL. Public health framing of news regarding childhood obesity in the United States. *Health communication* 2010;**25**(8):709-17
36. Bastian A. Representations of childhood obesity in Australian newsprint media and academic literature. *Aust N Z J Public Health* 2011;**35**(2):135-39
37. Maher J, Fraser S, Wright J. Framing the mother: childhood obesity, maternal responsibility and care. *J Gend Stud* 2010;**19**(3):233-47
38. Kalin SR, Fung TT. Comparison of child obesity prevention and control content in mainstream and Spanish-language US parenting magazines. *Journal of the Academy of Nutrition and Dietetics* 2013;**113**(1):133-40
39. Boero N. Obesity in the media: Social science weighs in. *Critical Public Health* 2013;**23**(3):371-80
40. Douglas F, Clark J, Craig L, et al. "It's a balance of just getting things right": mothers' views about pre-school childhood obesity and obesity prevention in Scotland. *BMC public health* 2014;**14**(1):1009
41. Harris JK, Moreland-Russell S, Tabak RG, et al. Communication About Childhood Obesity on Twitter. *Am J Public Health* 2014;**104**(7):e62-e69 doi: 10.2105/ajph.2013.301860[published Online First: Epub Date]].
42. Chou W-yS, Prestin A, Kunath S. Obesity in social media: a mixed methods analysis. *Translational behavioral medicine* 2014;**4**(3):314-23
43. Tobitt C. National newspaper ABCs: Industry-wide circulation decline continues as Metro and Sun top the table. Secondary National newspaper ABCs: Industry-wide circulation decline continues as Metro and Sun top the table 2018. <https://www.pressgazette.co.uk/national-newspaper-abcs-industry-wide-circulation-decline-continues-as-metro-and-sun-top-the-table/>.



- 1
- 2
- 3
- 4 44. Tobitt C. The Sun overtakes Mail Online to become UK's biggest online newsbrand, latest
- 5 Comscore data shows. Secondary The Sun overtakes Mail Online to become UK's biggest
- 6 online newsbrand, latest Comscore data shows 2018. [https://www.pressgazette.co.uk/the-](https://www.pressgazette.co.uk/the-sun-overtakes-mail-online-to-become-uks-biggest-online-newspaper-brand-latest-comscore-data-shows/)
- 7 [sun-overtakes-mail-online-to-become-uks-biggest-online-newspaper-brand-latest-comscore-](https://www.pressgazette.co.uk/the-sun-overtakes-mail-online-to-become-uks-biggest-online-newspaper-brand-latest-comscore-data-shows/)
- 8 [data-shows/](https://www.pressgazette.co.uk/the-sun-overtakes-mail-online-to-become-uks-biggest-online-newspaper-brand-latest-comscore-data-shows/).
- 9 45. McCombs M. *Setting the agenda: Mass media and public opinion*: John Wiley & Sons, 2018.
- 10 46. Harder RA, Sevenans J, Van Aelst P. Intermedia agenda setting in the social media age: How
- 11 traditional players dominate the news agenda in election times. *The International Journal of*
- 12 *Press/Politics* 2017;**22**(3):275-93
- 13 47. Press Gazette. National newspaper print ABCs for Jan 2017: Times and Observer both boost print
- 14 sales year on year. Secondary National newspaper print ABCs for Jan 2017: Times and
- 15 Observer both boost print sales year on year 2017.
- 16 [http://www.pressgazette.co.uk/national-newspaper-print-abcs-for-jan-2017-observer-up-](http://www.pressgazette.co.uk/national-newspaper-print-abcs-for-jan-2017-observer-up-year-on-year-the-sun-is-fastest-riser-month-on-month/)
- 17 [year-on-year-the-sun-is-fastest-riser-month-on-month/](http://www.pressgazette.co.uk/national-newspaper-print-abcs-for-jan-2017-observer-up-year-on-year-the-sun-is-fastest-riser-month-on-month/).
- 18 48. Ponsford D. Daily Mail and Sun launch front-page attacks on Corbyn as Fleet Street lines up
- 19 behind Theresa May. Secondary Daily Mail and Sun launch front-page attacks on Corbyn as
- 20 Fleet Street lines up behind Theresa May 2017. [https://www.pressgazette.co.uk/daily-mail-](https://www.pressgazette.co.uk/daily-mail-and-sun-launch-front-page-attacks-on-corbyn-as-fleet-street-lines-up-behind-theresa-may/)
- 21 [and-sun-launch-front-page-attacks-on-corbyn-as-fleet-street-lines-up-behind-theresa-may/](https://www.pressgazette.co.uk/daily-mail-and-sun-launch-front-page-attacks-on-corbyn-as-fleet-street-lines-up-behind-theresa-may/).
- 22 49. Smith M. How left or right-wing are the UK's newspapers? Secondary How left or right-wing are
- 23 the UK's newspapers? 2017. [https://yougov.co.uk/news/2017/03/07/how-left-or-right-](https://yougov.co.uk/news/2017/03/07/how-left-or-right-wing-are-uks-newspapers/)
- 24 [wing-are-uks-newspapers/](https://yougov.co.uk/news/2017/03/07/how-left-or-right-wing-are-uks-newspapers/).
- 25 50. Kellner P. General election 2015: how Britain really voted. Secondary General election 2015: how
- 26 Britain really voted 2015. [https://yougov.co.uk/topics/politics/articles-](https://yougov.co.uk/topics/politics/articles-reports/2015/06/08/general-election-2015-how-britain-really-voted)
- 27 [reports/2015/06/08/general-election-2015-how-britain-really-voted](https://yougov.co.uk/topics/politics/articles-reports/2015/06/08/general-election-2015-how-britain-really-voted).
- 28 51. Landis JR, Koch GG. The measurement of observer agreement for categorical data *Biometrics*
- 29 1977;**33**(1):159-74
- 30 52. Patterson C, Semple S, Wood K, et al. A quantitative content analysis of UK newsprint coverage
- 31 of proposed legislation to prohibit smoking in private vehicles carrying children. *BMC Public*
- 32 *Health* 2015;**15**:760
- 33 53. Patterson C, Katikireddi SV, Wood K, et al. Representations of minimum unit pricing for alcohol in
- 34 UK newspapers: a case study of a public health policy debate. *J Public Health* 2014;**37**(1):40-
- 35 49
- 36 54. Heuer CA, McClure KJ, Puhl RM. Obesity stigma in online news: A visual content analysis. *Journal*
- 37 *of Health Communication* 2011;**16**(9):976-87
- 38 55. McClure KJ, Puhl RM, Heuer CA. Obesity in the news: Do photographic images of obese persons
- 39 influence antifat attitudes? *Journal of health communication* 2011;**16**(4):359-71
- 40 56. Downs A. Up and down with ecology: the "issue-attention cycle". *The public* 1972
- 41 57. Schneider A, Ingram H. Social construction of target populations: Implications for politics and
- 42 policy. *Am Polit Sci Rev* 1993:334-47
- 43 58. Freeman B, Chapman S, Storey P. Banning smoking in cars carrying children: an analytical history
- 44 of a public health advocacy campaign. *Aust N Z J Public Health* 2008;**32**(1):60-65
- 45 59. Hilton S, Wood K, Bain J, et al. Newsprint coverage of smoking in cars carrying children: a case
- 46 study of public and scientific opinion driving the policy debate. *BMC Public Health*
- 47 2014;**14**(1):1116
- 48 60. Schwartz MB, Puhl R. Childhood obesity: a societal problem to solve. *Obesity reviews*
- 49 2003;**4**(1):57-71
- 50 61. Buckton CH, Patterson C, Hyseni L, et al. The palatability of sugar-sweetened beverage taxation:
- 51 A content analysis of newspaper coverage of the UK sugar debate. *PLOS ONE*
- 52 2018;**13**(12):e0207576 doi: 10.1371/journal.pone.0207576[published Online First: Epub
- 53 Date]].
- 54
- 55
- 56
- 57
- 58
- 59
- 60

1  
2  
3  
4  
5  
6  
7  
8  
9  
10  
11  
12  
13  
14  
15  
16  
17  
18  
19  
20  
21  
22  
23  
24  
25  
26  
27  
28  
29  
30  
31  
32  
33  
34  
35  
36  
37  
38  
39  
40  
41  
42  
43  
44  
45  
46  
47  
48  
49  
50  
51  
52  
53  
54  
55  
56  
57  
58  
59  
60

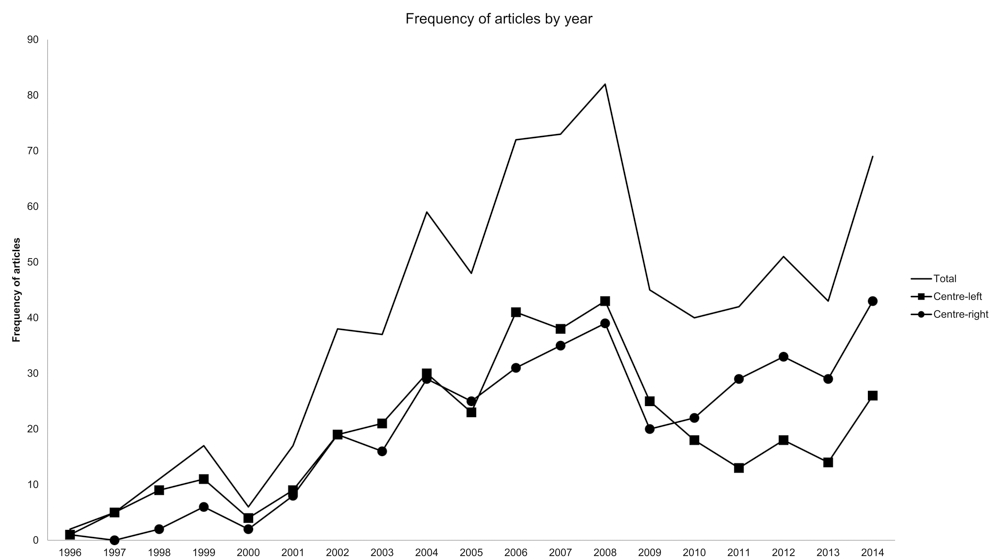

Figure 1. Frequency of articles by year

84x47mm (300 x 300 DPI)



Figure 2. Trends in individual and societal drivers and solutions

84x47mm (300 x 300 DPI)

Supplementary figure 1 – Caption <Frequency of newspaper articles about generic, childhood, and adult obesity >

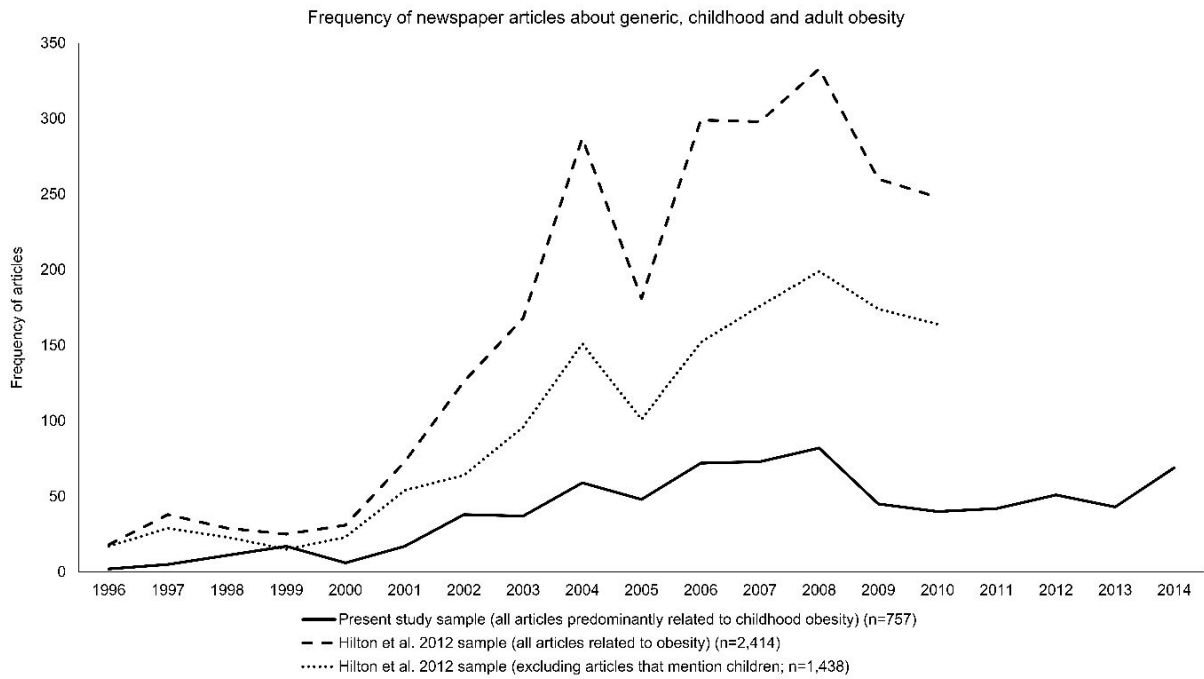

Supplementary figure 2 – Caption <Proportion of articles within years mentioning different categories of drivers and solutions about generic, childhood, and adult obesity>

Proportion of articles within years mentioning different categories of drivers and solutions within articles about generic, childhood and adult obesity

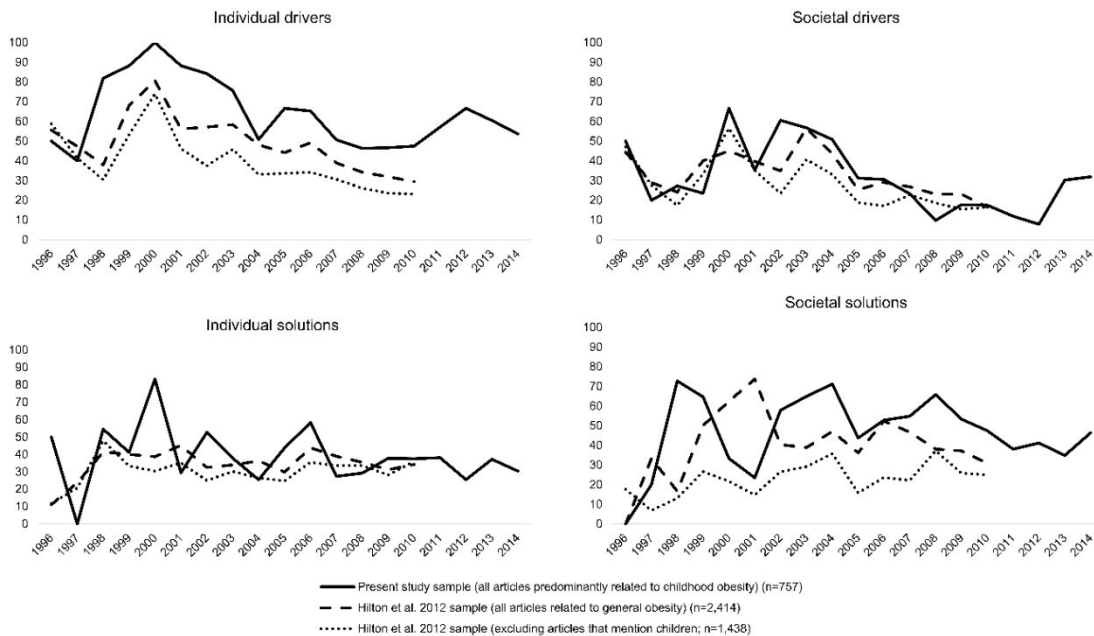

| No | Item                  | Guide and description                                                                                                                                                                                                                                                                                                                                                                                             | Reported on page |
|----|-----------------------|-------------------------------------------------------------------------------------------------------------------------------------------------------------------------------------------------------------------------------------------------------------------------------------------------------------------------------------------------------------------------------------------------------------------|------------------|
| 1  | Aim                   | State the research question the synthesis addresses.                                                                                                                                                                                                                                                                                                                                                              | Title and 8      |
| 2  | Synthesis methodology | Identify the synthesis methodology or theoretical framework which underpins the synthesis, and describe the rationale for choice of methodology ( <i>e.g. meta-ethnography, thematic synthesis, critical interpretive synthesis, grounded theory synthesis, realist synthesis, meta-aggregation, meta-study, framework synthesis</i> ).                                                                           | Title and 8      |
| 3  | Approach to searching | Indicate whether the search was pre-planned ( <i>comprehensive search strategies to seek all available studies</i> ) or iterative ( <i>to seek all available concepts until they theoretical saturation is achieved</i> ).                                                                                                                                                                                        | 8,9,10           |
| 4  | Inclusion criteria    | Specify the inclusion/exclusion criteria ( <i>e.g. in terms of population, language, year limits, type of publication, study type</i> ).                                                                                                                                                                                                                                                                          | 9                |
| 5  | Data sources          | Describe the information sources used ( <i>e.g. electronic databases (MEDLINE, EMBASE, CINAHL, psycINFO, Econlit), grey literature databases (digital thesis, policy reports), relevant organisational websites, experts, information specialists, generic web searches (Google Scholar) hand searching, reference lists</i> ) and when the searches conducted; provide the rationale for using the data sources. | 9                |

| No | Item                       | Guide and description                                                                                                                                                                                                                                                                                                                                                                             | Reported on page |
|----|----------------------------|---------------------------------------------------------------------------------------------------------------------------------------------------------------------------------------------------------------------------------------------------------------------------------------------------------------------------------------------------------------------------------------------------|------------------|
| 6  | Electronic Search strategy | Describe the literature search ( <i>e.g. provide electronic search strategies with population terms, clinical or health topic terms, experiential or social phenomena related terms, filters for qualitative research, and search limits</i> ).                                                                                                                                                   | 9                |
| 7  | Study screening methods    | Describe the process of study screening and sifting ( <i>e.g. title, abstract and full text review, number of independent reviewers who screened studies</i> ).                                                                                                                                                                                                                                   | 9                |
| 8  | Study characteristics      | Present the characteristics of the included studies ( <i>e.g. year of publication, country, population, number of participants, data collection, methodology, analysis, research questions</i> ).                                                                                                                                                                                                 | 9                |
| 9  | Study selection results    | Identify the number of studies screened and provide reasons for study exclusion ( <i>e.g. for comprehensive searching, provide numbers of studies screened and reasons for exclusion indicated in a figure/flowchart; for iterative searching describe reasons for study exclusion and inclusion based on modifications to the research question and/or contribution to theory development</i> ). | 9                |
| 10 | Rationale for appraisal    | Describe the rationale and approach used to appraise the included studies or selected findings ( <i>e.g. assessment of conduct (validity and robustness), assessment of reporting</i>                                                                                                                                                                                                             | 10               |

| No | Item                | Guide and description                                                                                                                                                                                                                                                                                | Reported on page |
|----|---------------------|------------------------------------------------------------------------------------------------------------------------------------------------------------------------------------------------------------------------------------------------------------------------------------------------------|------------------|
|    |                     | <i>(transparency), assessment of content and utility of the findings).</i>                                                                                                                                                                                                                           |                  |
| 11 | Appraisal items     | State the tools, frameworks and criteria used to appraise the studies or selected findings ( <i>e.g. Existing tools: CASP, QARI, COREQ, Mays and Pope [25]; reviewer developed tools; describe the domains assessed: research team, study design, data analysis and interpretations, reporting).</i> | 10               |
| 12 | Appraisal process   | Indicate whether the appraisal was conducted independently by more than one reviewer and if consensus was required.                                                                                                                                                                                  | 10               |
| 13 | Appraisal results   | Present results of the quality assessment and indicate which articles, if any, were weighted/excluded based on the assessment and give the rationale.                                                                                                                                                | NA               |
| 14 | Data extraction     | Indicate which sections of the primary studies were analysed and how were the data extracted from the primary studies? ( <i>e.g. all text under the headings “results /conclusions” were extracted electronically and entered into a computer software).</i>                                         | 10               |
| 15 | Software            | State the computer software used, if any.                                                                                                                                                                                                                                                            | 10               |
| 16 | Number of reviewers | Identify who was involved in coding and analysis.                                                                                                                                                                                                                                                    | 10               |

| No | Item                 | Guide and description                                                                                                                                                                                                                  | Reported on page |
|----|----------------------|----------------------------------------------------------------------------------------------------------------------------------------------------------------------------------------------------------------------------------------|------------------|
| 17 | Coding               | Describe the process for coding of data ( <i>e.g. line by line coding to search for concepts</i> ).                                                                                                                                    | 10               |
| 18 | Study comparison     | Describe how were comparisons made within and across studies ( <i>e.g. subsequent studies were coded into pre-existing concepts, and new concepts were created when deemed necessary</i> ).                                            | 11               |
| 19 | Derivation of themes | Explain whether the process of deriving the themes or constructs was inductive or deductive.                                                                                                                                           | NA               |
| 20 | Quotations           | Provide quotations from the primary studies to illustrate themes/constructs, and identify whether the quotations were participant quotations of the author's interpretation.                                                           | NA               |
| 21 | Synthesis output     | Present rich, compelling and useful results that go beyond a summary of the primary studies ( <i>e.g. new interpretation, models of evidence, conceptual models, analytical framework, development of a new theory or construct</i> ). | 15-19?           |
