# Supplementary material for: Media framing of childhood obesity: a content analysis of UK newspapers from 1996 to 2014
Source: PubMed Central journal article supplement (PMC6500306; doi:10.1136/bmjopen-2018-025646), 2019-04-04

Supplementary figure 1 – Caption <Frequency of newspaper articles about generic, childhood, and adult obesity >

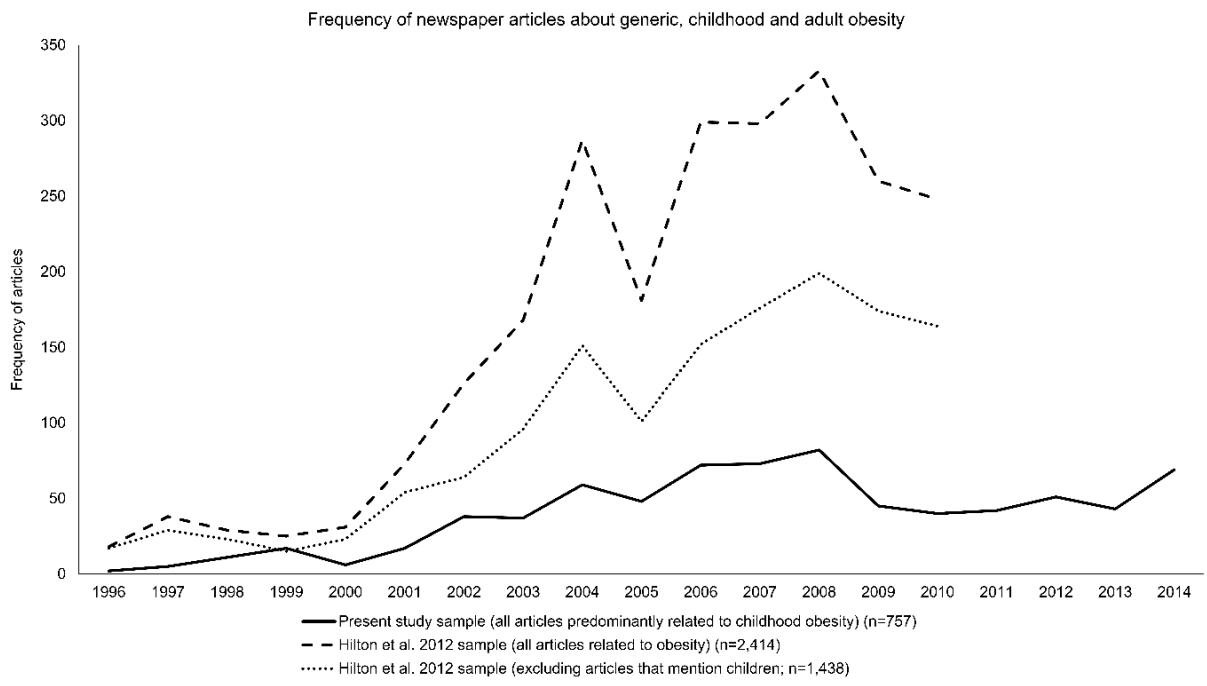

Supplementary figure 2 – Caption < Proportion of articles within years mentioning different categories of drivers and solutions about generic, childhood, and adult obesity >

Proportion of articles within years mentioning different categories of drivers and solutions within articles about generic, childhood and adult obesity

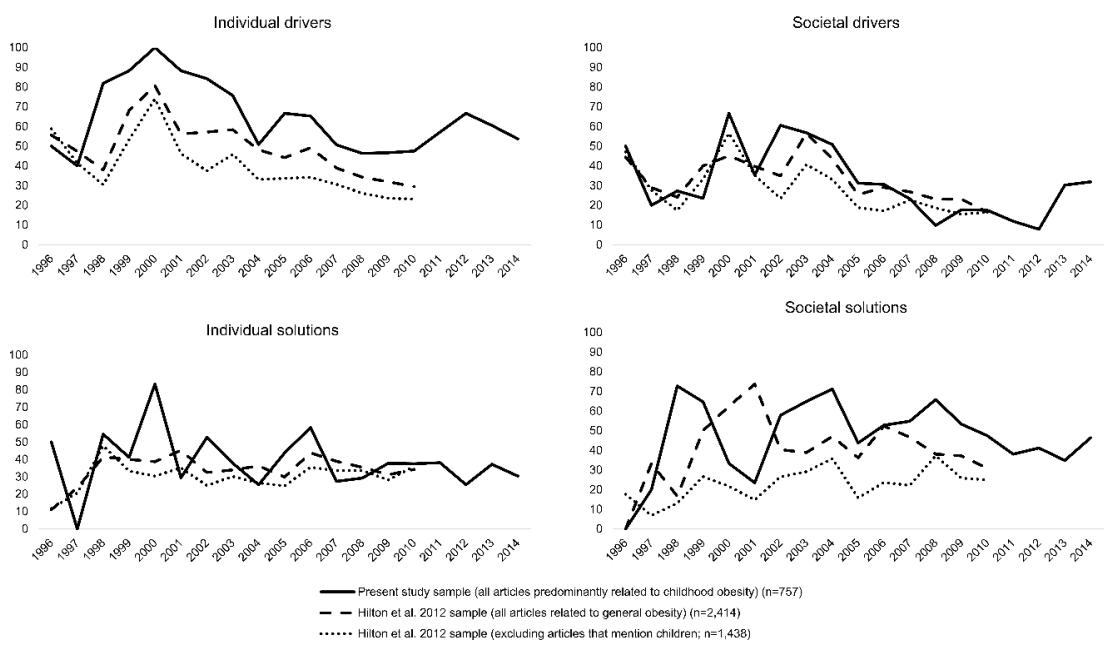

Supplement: bmjopen-2018-025646supp001.pdf [file bmjopen-2018-025646supp001.pdf]
